# Supplementary material for: Fused inverse-normal method for integrated differential expression analysis of RNA-seq data
Source: BMC Bioinformatics. 2022 Aug 5;23:320. doi: 10.1186/s12859-022-04859-9 (PMC9354357; doi:10.1186/s12859-022-04859-9)
Supplement: Supplementary file 4 — Additional file 4. Full list of differentially expressed genes (DEGs) identified in scenario 1 by the fused inverse-normal (FIN) method in glioblastoma (GBM) data application. [file 12859_2022_4859_MOESM4_ESM.csv]

Entrez_gene ID	Symbol	ng_FIN	dir	GSE123892_logFC	GSE151352_logFC	TCGA_GBM_logFC	mean_abslogFC	p_val_FIN	BH_p_value
7153	TOP2A	9.909581639	+++	9.666760909	1.80468601	7.296475027	6.255973982	0	0
51555	PEX5L	10.4156521	---	-9.08717821	-3.908512239	-4.177938992	5.724543147	0	0
6241	RRM2	9.793367128	+++	8.980118778	1.600009521	7.2994589	5.9598624	0	0
386618	KCTD4	8.045724889	-?-	-9.286326423	NA	-3.46726023	6.376793327	4.44E-16	6.17E-15
26289	AK5	10.78746392	---	-8.663425387	-4.379429896	-4.656051215	5.899635499	0	0
9928	KIF14	9.648872198	+++	7.244726133	1.822266819	5.483354389	4.85011578	0	0
9787	DLGAP5	9.98668145	+++	9.412290636	2.043152183	7.150901788	6.202114869	0	0
55355	HJURP	10.24297626	+++	9.137332615	2.25189843	5.979233962	5.789488336	0	0
10643	IGF2BP3	8.412814461	+++	5.809467155	1.441793631	6.229355499	4.493538761	0	0
54478	PIMREG	9.522461698	+++	8.604476496	2.597811326	6.114370634	5.772219486	0	0
10403	NDC80	9.901146325	+++	7.706187128	1.68175662	6.096048464	5.161330738	0	0
64168	NECAB1	10.78529394	---	-6.33937226	-4.430617458	-3.357943557	4.709311092	0	0
8329	HIST1H2AI	5.466170923	+++	7.184999277	2.136054009	4.4461973	4.589083529	2.30E-08	1.37E-07
51514	DTL	8.753324347	+++	6.026112304	1.1453875	4.942885138	4.038128314	0	0
8437	RASAL1	10.70434806	---	-8.107848267	-3.890112352	-5.359451567	5.785804062	0	0
93377	OPALIN	9.696910752	-?-	-13.20532611	NA	-5.023221687	9.114273901	0	0
9700	ESPL1	9.522979856	+++	7.977489036	2.52743351	4.489073375	4.99799864	0	0
4318	MMP9	7.775532039	+++	10.61057098	2.547761622	7.28670863	6.815013743	3.77E-15	4.80E-14
5328	PLAU	6.72979738	+++	6.109284993	1.934009863	4.023693171	4.022329342	8.49E-12	7.74E-11
7465	WEE1	10.39107753	+++	5.536971069	2.484680797	4.110292609	4.043981492	0	0
55872	PBK	9.762289729	+++	8.239350111	1.560176005	7.284538376	5.694688164	0	0
374393	FAM111B	8.793970164	+++	6.905790213	1.142273943	5.941028294	4.663030817	0	0
4605	MYBL2	9.953772383	+++	10.58032117	2.094149755	7.687757743	6.787409555	0	0
4288	MKI67	8.770744488	+++	7.918379084	1.800196572	5.883971607	5.200849088	0	0
51330	TNFRSF12A	7.581344863	+++	7.137350522	2.387970164	3.590472044	4.37193091	1.71E-14	2.04E-13
3775	KCNK1	10.49920423	---	-7.438114446	-4.217621706	-3.821015901	5.158917351	0	0
3236	HOXD10	8.193686973	+++	12.51451787	1.848092432	11.4519969	8.604869065	1.11E-16	1.62E-15
9717	SEC14L5	10.05571636	---	-7.930244689	-2.719066351	-4.051973281	4.900428107	0	0
64151	NCAPG	9.944193243	+++	6.879346407	1.843677856	5.981787387	4.901603883	0	0
134548	SOWAHA	9.696910752	-?-	-6.123695362	NA	-4.157009203	5.140352282	0	0
10112	KIF20A	10.11834515	+++	8.572044153	2.127222114	6.709665883	5.802977383	0	0
154215	NKAIN2	9.670775364	---	-10.41828688	-4.005461095	-3.629388807	6.017712261	0	0
2305	FOXM1	9.738549446	+++	7.413062393	2.199448853	4.876885114	4.829798787	0	0
10630	PDPN	8.0359863	+++	4.780937922	2.179646231	4.394288017	3.78495739	4.44E-16	6.17E-15
9833	MELK	9.691674372	+++	8.026372294	1.372222259	6.903365003	5.433986519	0	0
8318	CDC45	9.567800656	+++	7.675504006	1.994947576	5.691899984	5.120783855	0	0
282973	JAKMIP3	10.90633905	---	-5.85655089	-3.707911194	-3.626294615	4.3969189	0	0
57082	KNL1	9.236399548	+?+	6.172362389	NA	5.293003792	5.73268309	0	0
24137	KIF4A	10.14719579	+++	6.651396225	1.809587522	4.985518761	4.482167503	0	0
51512	GTSE1	9.550092094	+++	6.346389617	1.949158736	5.29390365	4.529817334	0	0
55388	MCM10	8.904438491	+++	7.935830757	2.820714668	4.927001449	5.227848958	0	0
51203	NUSAP1	10.29298057	+++	6.689413406	1.939700513	5.385854902	4.671656274	0	0
701	BUB1B	9.258648586	+++	5.863759848	1.463245116	4.986945675	4.104650213	0	0
7076	TIMP1	5.953967112	+++	5.90906331	1.571358157	3.415624281	3.632015249	1.31E-09	9.28E-09
7422	VEGFA	6.050367303	+++	5.64297045	2.655880843	3.029156016	3.776002436	7.23E-10	5.31E-09
3007	HIST1H1D	5.676427368	+++	4.895047631	1.933057287	3.777492601	3.535199173	6.88E-09	4.43E-08
10788	IQGAP2	9.100196941	+++	5.719855063	1.041906587	4.32425944	3.695340363	0	0
3206	HOXA10	7.75525602	+++	12.61014943	1.36658866	9.102840841	7.693192976	4.44E-15	5.62E-14
50859	SPOCK3	8.458421508	---	-9.84708423	-3.852609893	-3.271716135	5.657136753	0	0
9133	CCNB2	10.03648801	+++	6.658935482	2.014293356	5.219615601	4.630948146	0	0
6913	TBX15	6.866886377	+?+	5.769145839	NA	3.600562653	4.684854246	3.28E-12	3.10E-11
5274	SERPINI1	10.99535612	---	-6.271944615	-4.192669072	-3.912881678	4.792498455	0	0
1281	COL3A1	5.016224228	+-+	8.547881341	-0.347394925	6.248571055	5.047949107	5.27E-07	2.56E-06
64857	PLEKHG2	8.703011891	+++	4.567242219	1.586122364	2.82454376	2.992636114	0	0
11065	UBE2C	10.06676884	+++	8.473778927	2.013589829	7.36041345	5.949260736	0	0
3009	HIST1H1B	5.236063428	+++	8.520516961	2.188781726	4.924260152	5.211186279	8.20E-08	4.49E-07
1282	COL4A1	8.518133543	+++	7.543249397	1.757042449	4.875016035	4.725102627	0	0
3833	KIFC1	9.278511452	+++	6.295714014	1.746815001	5.444662072	4.495730362	0	0
256472	TMEM151A	9.304421158	-?-	-7.278600508	NA	-3.596339299	5.437469904	0	0
54842	MFSD6	10.89630122	---	-3.73742251	-2.154076388	-2.590832998	2.827443965	0	0
1740	DLG2	9.787680174	---	-5.028424754	-0.863584819	-3.964355392	3.285454988	0	0
3204	HOXA7	7.231749338	+++	10.6972069	1.709650061	8.935048464	7.113968474	2.38E-13	2.53E-12
2316	FLNA	7.409089271	+++	4.41656821	1.650229341	2.591130143	2.885975898	6.36E-14	7.18E-13
23601	CLEC5A	6.419760395	+++	8.974512811	1.469164254	3.955203905	4.79962699	6.82E-11	5.64E-10
983	CDK1	9.35925953	+++	5.173466134	1.218420327	4.893802066	3.761896176	0	0
139221	PWWP3B	7.79176378	-?-	-5.693575563	NA	-3.354278186	4.523926875	3.33E-15	4.26E-14
871	SERPINH1	8.718968395	+++	4.989779678	1.885159382	3.86755376	3.58083094	0	0
259266	ASPM	8.615434871	+++	7.64734327	2.073515545	4.837380813	4.852746543	0	0
4015	LOX	6.708277276	+++	6.165283121	3.06107321	4.417595383	4.547983905	9.85E-12	8.91E-11
83879	CDCA7	8.699474687	+++	5.96896921	0.348293531	4.201304453	3.506189065	0	0
3237	HOXD11	7.415667123	+?+	11.18713084	NA	8.971617267	10.07937405	6.05E-14	6.84E-13
9212	AURKB	10.08897269	+++	7.451763165	2.345779856	6.657768093	5.485103705	0	0
1292	COL6A2	5.254566518	+++	4.876189321	1.96283933	3.978914477	3.605981043	7.42E-08	4.08E-07
10396	ATP8A1	10.91303315	---	-4.990823099	-3.211860637	-3.662489707	3.955057814	0	0
100189589	DCTN1-AS1	10.88446294	---	-7.561439795	-4.183826212	-4.233073251	5.326113086	0	0
9829	DNAJC6	11.0715611	---	-4.314638632	-3.211253176	-3.611970548	3.712620785	0	0
123041	SLC24A4	6.731450602	---	-5.343288502	-2.281761379	-2.263208835	3.296086239	8.40E-12	7.66E-11
55165	CEP55	9.748252396	+++	6.232365637	1.668041726	5.392032986	4.43081345	0	0
3200	HOXA3	7.904772586	+++	10.15691427	1.168888233	9.220346747	6.848716416	1.33E-15	1.76E-14
79682	CENPU	9.516432755	+++	5.748515477	1.329689746	5.219353924	4.099186383	0	0
10966	RAB40B	9.97581819	---	-4.514014626	-1.796961213	-2.959192039	3.090055959	0	0
150468	CKAP2L	8.892674036	+++	5.227451429	1.695980213	4.190703309	3.70471165	0	0
80000	GREB1L	4.043401214	-?-	-6.837640425	NA	-1.700174085	4.268907255	2.63E-05	9.50E-05
57571	CARNS1	10.018589	---	-9.695974726	-2.995955972	-4.391690418	5.694540372	0	0
7272	TTK	8.655119205	+++	6.451939457	1.189824096	5.124201064	4.255321539	0	0
8356	HIST1H3J	5.460552529	+++	8.039854002	2.354924432	4.635185114	5.009987849	2.37E-08	1.41E-07
11033	ADAP1	9.696910752	-?-	-5.089034126	NA	-3.589664658	4.339349392	0	0
5872	RAB13	9.467940961	+++	4.135578241	1.353846128	2.712777634	2.734067334	0	0
6281	S100A10	6.825763322	+++	4.787059968	1.879300519	3.49271116	3.386357216	4.37E-12	4.10E-11
8969	HIST1H2AG	7.481023954	+++	6.018884812	2.825435233	3.188483491	4.010934512	3.69E-14	4.25E-13
134265	AFAP1L1	7.556717193	+++	4.211391043	1.786406251	3.027113146	3.00830348	2.07E-14	2.45E-13
3202	HOXA5	8.321709673	+++	10.88911651	1.094424581	9.195137506	7.059559532	0	0
144455	E2F7	9.176849832	+++	7.40777543	2.013530674	4.85516664	4.758824248	0	0
9464	HAND2	6.12890637	+++	8.317415515	1.928434265	7.451276428	5.899042069	4.42E-10	3.34E-09
5924	RASGRF2	11.09830366	---	-5.009771074	-3.585998744	-3.966527024	4.187432281	0	0
10763	NES	8.525458597	+++	5.771343696	2.390279933	3.45255216	3.87139193	0	0
64506	CPEB1	10.66356826	---	-4.268991872	-3.007568752	-2.40166819	3.226076271	0	0
554235	ASPDH	9.177311503	---	-5.550544268	-0.765291192	-3.085342949	3.133726136	0	0
84617	TUBB6	7.393607085	+++	5.053525982	2.351100497	3.010331611	3.471652697	7.15E-14	8.01E-13
56265	CPXM1	7.516031265	+++	8.174237295	2.115632402	4.15036942	4.813413039	2.82E-14	3.29E-13
5923	RASGRF1	10.4854031	---	-8.160243949	-3.981900613	-4.640314978	5.59415318	0	0
3235	HOXD9	7.662601966	+++	10.50351172	1.022943202	9.793747194	7.106734038	9.10E-15	1.12E-13
85453	TSPYL5	8.087173841	---	-4.274926664	-1.827036802	-2.538359177	2.880107548	3.33E-16	4.69E-15
7093	TLL2	6.75692385	---	-4.484425562	-1.685875228	-2.335208358	2.835169716	7.05E-12	6.47E-11
10024	TROAP	9.737195939	+++	11.60734951	1.734996693	6.415815945	6.58605405	0	0
5836	PYGL	8.188546025	+++	3.657538118	1.465261423	3.192921617	2.771907053	1.11E-16	1.62E-15
730130	TMEM229A	3.041217808	-?-	-7.453557484	NA	-1.231184977	4.342371231	0.001178117	0.003059728
2565	GABRG1	9.175458662	-?-	-8.579362952	NA	-4.171074898	6.375218925	0	0
22918	CD93	6.825000927	+++	5.093829508	1.501201969	2.910745104	3.168592194	4.40E-12	4.12E-11
146909	KIF18B	7.18750387	+?+	6.776787444	NA	4.135553366	5.456170405	3.30E-13	3.45E-12
157313	CDCA2	9.466642674	+++	6.445676945	1.390267478	5.661736147	4.499226857	0	0
1058	CENPA	9.890633439	+++	6.465121851	1.863105129	6.02343614	4.783887706	0	0
57471	ERMN	8.303106534	-?-	-10.1476717	NA	-3.499986274	6.823828986	0	0
10721	POLQ	7.541049658	+++	4.815133209	1.137653657	3.343522933	3.098769933	2.33E-14	2.75E-13
84735	CNDP1	6.669498443	---	-8.943070499	-3.339663509	-2.795408726	5.026047578	1.28E-11	1.15E-10
6279	S100A8	4.41455695	+++	10.62240695	0.442308497	3.550302073	4.871672507	5.06E-06	2.09E-05
2019	EN1	7.837378402	+++	8.135937334	1.840482193	8.440697562	6.13903903	2.33E-15	3.03E-14
135112	NCOA7	9.070839517	---	-3.487158104	-0.336462631	-2.697293278	2.173638004	0	0
5077	PAX3	5.124832319	+?+	8.061110383	NA	5.591120312	6.826115348	1.49E-07	7.85E-07
302	ANXA2	8.174625822	+++	5.671518291	2.170461632	4.147782073	3.996587332	1.11E-16	1.62E-15
54821	ERCC6L	7.86998216	+++	7.026391311	1.080503768	3.934741694	4.013878924	1.78E-15	2.33E-14
340554	ZC3H12B	7.376949729	---	-6.330936918	-2.197144766	-2.857408593	3.795163426	8.09E-14	9.01E-13
222537	HS3ST5	7.812422114	---	-7.026589959	-2.160896	-2.774590555	3.987358838	2.78E-15	3.59E-14
1183	CLCN4	10.34907998	---	-3.656821998	-1.940708755	-2.970746964	2.856092572	0	0
26472	PPP1R14B	9.719422357	+++	3.456978919	1.259968251	3.045515648	2.587487606	0	0
4188	MDFI	7.151886937	+++	6.007206262	2.343526914	4.241208315	4.197313831	4.28E-13	4.43E-12
2335	FN1	5.725781602	+++	4.755652995	0.394522828	3.762732521	2.970969448	5.15E-09	3.39E-08
7431	VIM	10.38736247	+++	5.259991937	2.109636255	3.665365892	3.678331361	0	0
1111	CHEK1	8.086009605	+++	4.102697027	1.280671209	2.3459957	2.576454645	3.33E-16	4.69E-15
7035	TFPI	7.28063319	+++	5.153122674	0.811461949	4.260027494	3.408204039	1.66E-13	1.79E-12
220134	SKA1	9.659531108	+++	6.291060877	1.88356706	5.189763138	4.454797025	0	0
55215	FANCI	7.520487742	+++	3.628335664	1.05360247	2.886084571	2.522674235	2.73E-14	3.20E-13
1870	E2F2	8.30495403	+++	8.396255892	1.426773564	5.749736671	5.190922042	0	0
3209	HOXA13	5.434372302	+?+	10.95322834	NA	6.48814232	8.720685329	2.75E-08	1.61E-07
26585	GREM1	4.434114237	-?-	-8.036279085	NA	-1.980451936	5.00836551	4.62E-06	1.93E-05
57467	HHATL	7.156243522	-?-	-6.51323426	NA	-2.896803891	4.705019076	4.15E-13	4.29E-12
11082	ESM1	5.006748534	+++	8.20940076	1.733511218	2.843545152	4.262152377	2.77E-07	1.40E-06
79019	CENPM	7.701807214	+++	5.760199679	1.138372441	4.116486428	3.671686183	6.66E-15	8.27E-14
9493	KIF23	8.460306669	+?+	5.736716513	NA	4.207582719	4.972149616	0	0
9053	MAP7	10.61059552	---	-6.476925084	-2.363816596	-3.026985896	3.955909192	0	0
4609	MYC	6.826619361	+++	3.759679139	2.12562929	2.176002886	2.687103772	4.35E-12	4.07E-11
388523	ZNF728	2.849859272	-?-	-7.263761083	NA	-1.700151561	4.481956322	0.002186929	0.005351898
57664	PLEKHA4	7.48562458	+++	5.232612421	1.85680105	3.388673061	3.492695511	3.56E-14	4.12E-13
4192	MDK	8.922596196	+++	5.857583524	1.497912174	4.127445548	3.827647082	0	0
55723	ASF1B	9.722877593	+++	5.70309331	1.578861738	5.873257261	4.38507077	0	0
332	BIRC5	9.628672207	+++	5.88604287	2.310205291	6.310249779	4.835499314	0	0
79733	E2F8	9.575221233	+?+	6.348790484	NA	6.56363086	6.456210672	0	0
145258	GSC	8.233996571	+++	7.7258263	1.438939926	7.140347172	5.435037799	1.11E-16	1.62E-15
128239	IQGAP3	7.572498545	+++	6.235190435	1.945391411	3.231510436	3.804030761	1.83E-14	2.19E-13
995	CDC25C	8.552065543	+++	6.416164656	1.277211007	4.816741211	4.170038958	0	0
64105	CENPK	8.7589225	+++	4.968227613	1.100662604	4.676011065	3.581633761	0	0
25769	SLC24A2	10.5259971	---	-7.405945083	-3.131802736	-3.679348322	4.739032047	0	0
493869	GPX8	7.094206789	+++	5.653813479	0.892618764	4.927559246	3.82466383	6.50E-13	6.62E-12
115273	RAB42	9.782275589	+++	6.254038915	1.961984299	4.721543247	4.312522153	0	0
9185	REPS2	10.58654747	---	-6.153976167	-3.193546918	-3.975507172	4.441010086	0	0
9180	OSMR	6.103483078	+++	4.631660999	1.739219449	2.597298871	2.989393106	5.19E-10	3.88E-09
8463	TEAD2	6.458339381	+++	5.424457411	1.104048717	3.313826083	3.280777404	5.29E-11	4.45E-10
79968	WDR76	8.311698931	+++	3.595808193	0.963611528	2.972165995	2.510528572	0	0
55117	SLC6A15	9.541253733	---	-7.811936159	-4.33135197	-3.873690592	5.338992907	0	0
3203	HOXA6	7.633269167	+?+	10.23253564	NA	8.805967796	9.519251717	1.14E-14	1.40E-13
6909	TBX2	7.001808159	+++	5.181639189	1.485362923	2.642356721	3.103119611	1.26E-12	1.25E-11
1663	DDX11	5.256373285	+++	3.492164293	1.208285185	1.33610217	2.012183883	7.35E-08	4.05E-07
8351	HIST1H3D	3.189260376	+?+	4.002984994	NA	1.684602875	2.843793934	0.000713187	0.001934254
7041	TGFB1I1	9.828967769	+++	5.840866306	1.627281768	3.569746351	3.679298142	0	0
9674	KIAA0040	7.395558474	+++	4.660055688	1.500462907	3.238473956	3.132997517	7.04E-14	7.90E-13
4118	MAL	9.144600494	---	-8.931125313	-2.955297333	-3.55998463	5.148802425	0	0
9156	EXO1	7.725542334	+?+	5.307125964	NA	3.769530247	4.538328106	5.55E-15	6.95E-14
23017	FAIM2	10.45711894	---	-4.83298381	-2.699039878	-3.519360766	3.683794818	0	0
11004	KIF2C	9.449884062	+++	7.143472676	1.622804319	4.910517818	4.558931604	0	0
338	APOB	2.073533399	-?-	-5.379771433	NA	-0.810705614	3.095238523	0.019061333	0.036919238
5649	RELN	10.3446323	---	-6.747333558	-3.831254931	-4.271529327	4.950039272	0	0
11076	TPPP	10.28729886	---	-6.407989507	-2.781343196	-4.26367845	4.484337051	0	0
8407	TAGLN2	8.416573998	+++	3.556520397	1.648350419	3.213976685	2.8062825	0	0
6280	S100A9	5.011840244	+++	7.112018917	1.135553301	3.475108786	3.907560335	2.70E-07	1.37E-06
55966	AJAP1	10.42817842	---	-5.807880869	-2.83447873	-4.309016094	4.317125231	0	0
56163	RNF17	7.292229503	-??	-7.376271225	NA	NA	7.376271225	1.52E-13	1.65E-12
11275	KLHL2	9.50937825	-?-	-2.807503412	NA	-2.24134109	2.524422251	0	0
60495	HPSE2	3.791206975	-?-	-6.220999651	NA	-1.85447543	4.03773754	7.50E-05	0.000247675
55504	TNFRSF19	9.258934616	+++	4.628177812	2.21497973	3.880316454	3.574491332	0	0
114792	KLHL32	8.710470014	---	-6.019867454	-3.320377888	-2.765866758	4.0353707	0	0
23149	FCHO1	10.00245747	---	-4.607286616	-1.547377971	-3.068521923	3.074395503	0	0
3976	LIF	3.09455018	+?+	8.6024862	NA	1.786601176	5.194543688	0.000985558	0.002599063
130399	ACVR1C	10.66165092	---	-6.49325274	-4.435725819	-4.057106533	4.995361697	0	0
83990	BRIP1	7.253292465	+++	5.088908745	1.405719873	3.353356807	3.282661809	2.03E-13	2.18E-12
933	CD22	10.31850465	---	-7.846956489	-3.856185886	-4.061863773	5.255002049	0	0
3765	KCNJ9	9.992522728	---	-4.042844022	-2.646239862	-3.972388952	3.553824279	0	0
10382	TUBB4A	8.05718308	---	-5.91255172	-2.258387841	-3.154142614	3.775027392	4.44E-16	6.17E-15
1978	EIF4EBP1	10.45527946	+++	4.190460542	2.140176627	3.676286104	3.335641091	0	0
20	ABCA2	10.16594059	---	-4.938067102	-1.936947496	-3.020815766	3.298610121	0	0
4060	LUM	3.837440435	+-+	4.898052208	-1.570187468	4.457437666	3.641892447	0.000124323	0.000394283
84084	RAB6C	9.331203961	-?-	-7.831731437	NA	-2.262439784	5.04708561	0	0
84440	RAB11FIP4	10.54966302	---	-4.352362892	-3.042813307	-3.742061861	3.712412686	0	0
54033	RBM11	8.220995293	-?-	-6.505313335	NA	-3.372382702	4.938848018	1.11E-16	1.62E-15
6608	SMO	7.569671765	+++	3.710300943	1.407089877	3.098628052	2.738672958	1.88E-14	2.24E-13
10460	TACC3	5.96814848	+++	4.555660637	1.660801443	3.962945762	3.393135947	1.20E-09	8.55E-09
8471	IRS4	3.139618322	-?-	-6.591822633	NA	-2.262726279	4.427274456	0.00084584	0.002259563
57554	LRRC7	10.48002494	---	-7.824331012	-4.66367131	-4.43610231	5.641368211	0	0
64714	PDIA2	8.719226541	---	-5.291753415	-1.640437921	-3.281554551	3.404581963	0	0
84733	CBX2	6.077717706	+++	4.395311384	1.080671758	3.309414734	2.928465959	6.10E-10	4.52E-09
55247	NEIL3	7.711311879	+++	5.668527719	0.668804136	4.424509347	3.587280401	6.22E-15	7.75E-14
3915	LAMC1	7.329818053	+++	4.31841333	1.39026382	2.964744484	2.891140544	1.15E-13	1.26E-12
375612	LHFPL3	4.067885179	+++	3.35113771	1.681603129	2.095027924	2.375922921	2.37E-05	8.64E-05
4099	MAG	7.118260791	---	-10.09727126	-2.215989249	-3.346883846	5.220048118	5.46E-13	5.59E-12
23397	NCAPH	8.43596192	+++	4.533709076	1.9115323	4.170044029	3.538428468	0	0
79641	ROGDI	9.825320221	---	-3.018807147	-1.356296819	-2.241656793	2.20558692	0	0
5806	PTX3	6.325938978	+++	7.073860774	2.874450184	4.232077203	4.726796053	1.26E-10	1.01E-09
3576	CXCL8	3.223227867	+++	6.79235706	1.508982798	2.094717565	3.465352474	0.000633773	0.001739481
23704	KCNE4	4.731531174	+++	5.235571082	1.457062274	2.065155624	2.919262993	1.11E-06	5.16E-06
481	ATP1B1	10.97607511	---	-4.03276859	-3.150738521	-2.880508496	3.354671869	0	0
401474	SAMD12	11.18877701	---	-4.756993955	-3.888779864	-4.316052529	4.320608783	0	0
3037	HAS2	8.105270775	+++	4.690303989	1.81799513	4.142481785	3.550260302	2.22E-16	3.17E-15
283431	GAS2L3	8.314831016	+++	4.675385393	1.169033489	3.575875351	3.140098078	0	0
79804	HAND2-AS1	4.888610496	+++	9.623518805	1.647493441	6.498616781	5.923209675	5.08E-07	2.47E-06
56521	DNAJC12	9.512831814	---	-3.544716905	-2.347813031	-2.113964066	2.668831334	0	0
51062	ATL1	10.63714616	---	-3.211892952	-2.166352896	-2.88138276	2.753209536	0	0
4071	TM4SF1	2.001864482	+++	3.594181399	0.022849276	0.773033463	1.463354713	0.022649654	0.042934011
26249	KLHL3	10.18139015	---	-3.193761343	-1.718501056	-2.689161231	2.533807877	0	0
57460	PPM1H	10.75679385	---	-4.114194676	-2.737380934	-3.189339371	3.34697166	0	0
9052	GPRC5A	2.393681294	+++	5.262832588	0.506003944	1.152241707	2.307026079	0.008340118	0.017718276
79993	ELOVL7	5.875662378	---	-4.864431126	-2.943850819	-1.255949404	3.02141045	2.11E-09	1.46E-08
389	RHOC	7.502452999	+?+	3.367471665	NA	2.323802637	2.845637151	3.13E-14	3.63E-13
5818	NECTIN1	9.283670466	---	-3.222996482	-1.074952435	-2.58693812	2.294962346	0	0
2359	FPR3	5.779978247	+++	6.983781277	0.658038118	4.047735387	3.89651826	3.74E-09	2.51E-08
101927459	LINC01608	6.976902663	-??	-12.27272863	NA	NA	12.27272863	1.51E-12	1.48E-11
388403	YPEL2	9.156630061	---	-3.624926544	-0.560104747	-2.227206832	2.137412708	0	0
5567	PRKACB	10.85032506	---	-3.07686519	-2.10126481	-1.88507589	2.354401963	0	0
26051	PPP1R16B	10.32313804	---	-6.018903258	-3.360381	-3.653908466	4.344397574	0	0
3225	HOXC9	6.42997136	+?+	9.791127927	NA	7.743846668	8.767487298	6.38E-11	5.30E-10
8701	DNAH11	5.587836118	+++	3.646584576	2.660275216	2.750578198	3.019145996	1.15E-08	7.16E-08
2494	NR5A2	8.027813394	+++	7.447952509	0.494971065	4.500845493	4.147923022	4.44E-16	6.17E-15
11155	LDB3	10.33397368	---	-8.412807857	-3.70424484	-3.941749256	5.352933984	0	0
57644	MYH7B	9.877913872	---	-4.585451341	-1.847392145	-3.558025599	3.330289695	0	0
158135	TTLL11	9.760308407	---	-3.595357966	-1.368498624	-1.638856672	2.200904421	0	0
57221	ARFGEF3	9.46276706	---	-3.172554412	-1.135544558	-3.26905912	2.525719363	0	0
374946	DRAXIN	3.639989386	+++	5.632758159	1.367609932	1.366766159	2.78904475	0.000136325	0.000429075
1278	COL1A2	4.234804917	+-+	5.667650165	-0.26762719	4.695947426	3.543741594	2.29E-05	8.37E-05
2913	GRM3	10.4332361	---	-5.781719574	-3.848488754	-3.729381763	4.453196697	0	0
4811	NID1	6.335482276	+++	4.112163158	0.575123738	3.684802911	2.790696602	1.18E-10	9.56E-10
157570	ESCO2	8.719128628	+++	4.910770241	1.380742146	5.132499465	3.808003951	0	0
220042	DDIAS	8.915474961	+++	4.268885532	1.681115822	3.635510848	3.195170734	0	0
60484	HAPLN2	7.176755985	---	-6.271463957	-2.841196575	-2.88945494	4.000705157	3.57E-13	3.72E-12
1903	S1PR3	6.892163975	+?+	3.9751267	NA	2.972821291	3.473973996	2.75E-12	2.61E-11
1393	CRHBP	10.44840165	---	-6.586283443	-3.614057467	-3.651712195	4.617351035	0	0
7837	PXDN	6.056672125	+++	4.509374573	1.834671734	2.736279223	3.026775176	6.95E-10	5.11E-09
5334	PLCL1	9.772545162	---	-5.098856668	-2.814148585	-2.75086519	3.554623481	0	0
1133	CHRM5	7.12666563	-?-	-7.006916622	NA	-2.592608159	4.79976239	5.14E-13	5.28E-12
60681	FKBP10	8.625932469	+++	4.226998908	1.491020405	2.990685403	2.902901572	0	0
57537	SORCS2	7.929929034	---	-4.012201273	-1.775074858	-2.215936701	2.66773761	1.11E-15	1.48E-14
151887	CCDC80	7.999981981	+++	3.993921165	1.075918514	3.484231422	2.851357033	6.66E-16	9.09E-15
90853	SPOCD1	7.033926102	+++	5.946880713	3.188829997	5.071202995	4.735637902	1.00E-12	1.00E-11
22891	ZNF365	9.411291475	-?-	-4.060307096	NA	-3.21555913	3.637933113	0	0
54511	HMGCLL1	9.312797045	---	-8.758612254	-4.97320114	-3.431034394	5.720949263	0	0
27296	TP53TG5	9.410325504	-?-	-7.977744249	NA	-2.930011261	5.453877755	0	0
4001	LMNB1	8.343007963	+++	4.47499817	1.463189756	3.549364911	3.162517612	0	0
59	ACTA2	3.820762052	+++	5.080733409	0.018947945	2.386513746	2.495398367	6.65E-05	0.000221906
9911	TMCC2	10.10708114	---	-3.905019129	-2.081883612	-2.766494928	2.917799223	0	0
3226	HOXC10	6.943518902	+?+	9.640244626	NA	9.445328641	9.542786633	1.91E-12	1.85E-11
161725	OTUD7A	10.22520984	---	-4.57939905	-2.788715298	-3.470624261	3.61291287	0	0
92369	SPSB4	6.209261171	+++	4.898258485	1.650713989	3.024754373	3.191242282	2.66E-10	2.06E-09
4072	EPCAM	9.631730182	---	-4.930094441	-2.558351467	-3.035560614	3.508002174	0	0
84504	NKX6-2	6.257352865	---	-8.966551795	-1.753946557	-3.021577253	4.580691868	1.96E-10	1.54E-09
11326	VSIG4	4.306738109	+++	4.687745452	0.006110639	3.698785487	2.797547192	8.28E-06	3.29E-05
4336	MOBP	6.973941955	---	-11.54368006	-3.559110316	-3.236711436	6.11316727	1.54E-12	1.50E-11
90381	TICRR	6.07545046	+++	6.308804603	1.032881782	2.606615868	3.316100751	6.18E-10	4.57E-09
3913	LAMB2	7.14829502	+++	3.167798295	1.206150406	2.008950646	2.127633116	4.39E-13	4.54E-12
105375304	LOC105375304	4.024393828	+-+	4.106478928	-0.228378855	3.268521095	2.534459626	5.71E-05	0.000193489
128218	TMEM125	5.971945547	-?-	-10.12843775	NA	-2.990233108	6.559335428	1.17E-09	8.37E-09
768	CA9	5.450365948	+++	8.721507807	1.402459625	5.368465284	5.164144239	2.51E-08	1.48E-07
55356	SLC22A15	9.996357838	---	-5.486232155	-3.066878473	-2.578277481	3.710462703	0	0
4155	MBP	6.909851639	---	-8.540917183	-1.35405899	-3.037176395	4.310717522	2.43E-12	2.32E-11
333	APLP1	9.780691426	---	-5.447212644	-1.60057381	-2.831008265	3.292931573	0	0
22802	CLCA4	5.931853559	-?-	-10.44724335	NA	-3.079909469	6.763576411	1.50E-09	1.06E-08
93185	IGSF8	9.760828022	---	-2.81610899	-1.143476322	-2.069254295	2.009613202	0	0
2149	F2R	9.438729436	+++	5.858786712	1.307103193	4.775479877	3.980456594	0	0
221294	NT5DC1	7.972466372	---	-5.048203145	-2.485284926	-1.856547233	3.130011768	7.77E-16	1.05E-14
301	ANXA1	7.106494095	+++	4.973802622	1.161826636	4.197952383	3.444527214	5.95E-13	6.08E-12
11117	EMILIN1	5.060868386	+++	4.099646767	1.901962651	2.315665957	2.772425125	2.09E-07	1.08E-06
11130	ZWINT	7.196159207	+++	4.000167172	1.545799521	2.480779767	2.675582153	3.10E-13	3.25E-12
23031	MAST3	9.845538807	---	-4.455229389	-1.700729648	-3.714197679	3.290052239	0	0
79885	HDAC11	10.07392449	---	-3.594895065	-1.719517776	-2.529439395	2.614617412	0	0
100302640	LINC00882	3.960657227	-?-	-3.33235959	NA	-1.059615307	2.195987448	3.74E-05	0.000131451
5522	PPP2R2C	9.361924476	-?-	-6.472746946	NA	-4.49228539	5.482516168	0	0
2146	EZH2	9.481689631	+++	4.688150014	1.124640245	4.571271942	3.461354067	0	0
2028	ENPEP	7.096662277	+++	5.516752279	0.455815455	3.47253783	3.148368521	6.39E-13	6.51E-12
4313	MMP2	7.40101658	+++	3.630425934	1.872886541	3.974518361	3.159276945	6.76E-14	7.60E-13
9332	CD163	5.293270502	+++	6.032313403	0.871560473	4.621963423	3.841945766	6.01E-08	3.35E-07
3224	HOXC8	6.150848403	+?+	8.439496139	NA	7.203326966	7.821411553	3.85E-10	2.93E-09
56992	KIF15	7.681666059	+++	4.707099806	1.568646658	3.404589035	3.2267785	7.88E-15	9.73E-14
3910	LAMA4	5.339840566	+++	3.23682542	0.333937485	2.465103812	2.011955572	4.65E-08	2.64E-07
101929595	LOC101929595	5.963985244	-?-	-6.184913223	NA	-2.521490212	4.353201717	1.23E-09	8.76E-09
27286	SRPX2	7.129518321	+++	5.365061559	2.238678572	5.322317443	4.308685858	5.04E-13	5.17E-12
83714	NRIP2	9.349392485	-?-	-5.723229002	NA	-2.411861505	4.067545253	0	0
83903	HASPIN	8.296641279	+++	4.966210734	2.008893603	4.19330798	3.722804106	0	0
6262	RYR2	10.6349127	---	-7.528261876	-5.623823683	-5.709966889	6.287350816	0	0
6622	SNCA	10.49871756	---	-5.746599407	-2.763399321	-4.116948805	4.208982511	0	0
9951	HS3ST4	9.343866511	-?-	-8.207096513	NA	-4.251875563	6.229486038	0	0
119391	GSTO2	10.62242789	---	-4.157153248	-2.913241075	-2.82388253	3.298092284	0	0
29923	HILPDA	4.427387772	+?+	4.00197777	NA	2.25994316	3.130960465	4.77E-06	1.98E-05
10085	EDIL3	9.386574128	---	-7.29509194	-3.527267419	-3.147951414	4.656770258	0	0
85236	HIST1H2BK	3.70116775	+-+	3.068516137	-0.211509376	1.691811557	1.657279023	0.00021461	0.000650071
1080	CFTR	4.383599045	-?-	-8.51958174	NA	-1.636680912	5.078131326	5.84E-06	2.39E-05
4958	OMD	1.975111325	-?-	-5.04485455	NA	-0.920813791	2.98283417	0.024127758	0.045495716
3227	HOXC11	6.46190432	+?+	9.826592652	NA	10.13495217	9.980772411	5.17E-11	4.35E-10
105369203	LOC105369203	7.401668496	+?+	5.66540646	NA	4.850855406	5.258130933	6.73E-14	7.57E-13
79801	SHCBP1	7.51300013	+++	3.862489558	0.975769634	2.831007789	2.556422327	2.89E-14	3.37E-13
5168	ENPP2	8.464971318	---	-7.430560665	-1.480374575	-3.274453067	4.061796103	0	0
5888	RAD51	7.578956617	+-+	4.377352653	-0.199851522	3.895205909	2.824136695	3.49E-14	4.03E-13
6495	SIX1	5.688025267	+++	6.084440602	1.212363678	4.36692771	3.887910663	6.43E-09	4.17E-08
3676	ITGA4	5.731066723	+++	4.191605976	1.085942638	3.045104655	2.774217756	4.99E-09	3.29E-08
1017	CDK2	9.341446802	+++	4.153725257	1.105597502	3.555341261	2.93822134	0	0
5118	PCOLCE	5.600625825	+++	4.971942285	2.144912004	3.933399528	3.683417939	1.07E-08	6.67E-08
348487	FAM131C	4.75199536	---	-4.695026768	-2.038924667	-1.502416112	2.745455849	1.01E-06	4.69E-06
116362	RBP7	6.915049597	---	-6.943098505	-2.761044218	-1.942040759	3.882061161	2.34E-12	2.24E-11
23224	SYNE2	4.802358698	+++	2.84879067	1.125500573	1.139301736	1.704530993	7.84E-07	3.71E-06
3213	HOXB3	6.541287608	+?+	9.073251437	NA	7.291893528	8.182572483	3.05E-11	2.63E-10
10507	SEMA4D	10.25808468	---	-5.146738124	-2.240228855	-3.045417251	3.47746141	0	0
341640	FREM2	5.315267104	+++	3.921183316	2.328648813	2.455279954	2.901704028	5.33E-08	2.99E-07
3310	HSPA6	5.444239757	+++	4.488406508	1.374991557	3.262968428	3.042122164	2.60E-08	1.53E-07
114876	OSBPL1A	10.74772828	---	-2.891763234	-2.104854912	-1.883988426	2.293535524	0	0
140803	TRPM6	9.320721244	-?-	-6.473335916	NA	-3.07581068	4.774573298	0	0
5803	PTPRZ1	5.713755153	+++	3.602922644	0.834916811	2.359080219	2.265639891	5.53E-09	3.62E-08
4199	ME1	4.882973587	---	-3.856390915	-1.828416499	-1.608086514	2.430964643	5.22E-07	2.54E-06
10982	MAPRE2	9.806188466	---	-2.630191389	-1.373947149	-1.47741576	1.827184766	0	0
3006	HIST1H1C	5.235125352	+++	2.884109775	1.482995649	2.337046037	2.234717153	8.24E-08	4.51E-07
1995	ELAVL3	5.789207096	-?-	-2.826312685	NA	-2.022578555	2.42444562	3.54E-09	2.38E-08
3955	LFNG	6.720749201	+++	4.426842542	2.189634139	2.839873315	3.152116666	9.04E-12	8.22E-11
929	CD14	5.190293957	+++	3.892009089	1.693328949	2.308341293	2.631226443	1.05E-07	5.67E-07
9252	RPS6KA5	9.357970652	---	-3.773250334	-2.395894075	-1.9173373	2.695493903	0	0
27197	GPR82	7.424775732	+-+	6.761904242	-0.59014179	5.684871523	4.345639185	1.13E-13	1.24E-12
55243	KIRREL1	6.034438492	+++	4.895126741	1.773670993	2.148753985	2.939183906	7.98E-10	5.83E-09
5241	PGR	6.152458879	-?-	-4.756927126	NA	-2.378278564	3.567602845	3.81E-10	2.90E-09
169611	OLFML2A	5.569554863	+++	4.287600443	1.074488179	1.996933268	2.453007297	1.28E-08	7.88E-08
729359	PLIN4	6.52544879	-?-	-3.532377544	NA	-2.437662273	2.985019908	3.39E-11	2.91E-10
3205	HOXA9	5.598431955	+?+	11.77995076	NA	8.381606836	10.0807788	1.08E-08	6.75E-08
143879	KBTBD3	3.301624153	---	-2.825465959	-1.651611837	-0.372391605	1.6164898	0.000480634	0.001353862
26499	PLEK2	6.543573114	+?+	7.182504611	NA	3.274361974	5.228433292	3.00E-11	2.60E-10
6457	SH3GL3	10.40755146	---	-8.139025162	-5.081674582	-4.196195697	5.805631814	0	0
11013	TMSB15A	5.640531839	+++	6.822590301	2.780400062	5.61481977	5.072603378	8.48E-09	5.39E-08
4323	MMP14	7.209614907	+++	4.654532607	1.689841455	3.956859906	3.433744656	2.81E-13	2.95E-12
4069	LYZ	5.10967397	+-+	4.839526166	-0.23545935	4.390980581	3.155322032	3.23E-07	1.62E-06
8614	STC2	5.819479366	+++	4.875895833	2.91000381	3.107067033	3.630988892	2.95E-09	2.01E-08
57165	GJC2	9.117813809	---	-5.356316676	-2.130123822	-3.233228903	3.573223134	0	0
145282	MIPOL1	3.072384897	---	-4.222821356	-1.591413211	-1.066340157	2.293524908	0.001061779	0.002784831
283999	TMEM235	9.298124823	-?-	-8.929271486	NA	-4.670795114	6.8000333	0	0
92312	MEX3A	6.127867299	+++	4.599112936	0.927604899	3.976884007	3.167867281	4.45E-10	3.36E-09
1063	CENPF	6.523585056	+++	5.574367879	1.698976128	3.462138581	3.578494196	3.43E-11	2.94E-10
9902	MRC2	6.586703705	+++	3.27085422	2.139388759	2.903198839	2.771147273	2.25E-11	1.97E-10
3199	HOXA2	6.722650981	+?+	7.758322168	NA	9.280705821	8.519513994	8.92E-12	8.12E-11
10485	C1orf61	3.413386803	+++	2.662689757	0.309297189	1.555804728	1.509263891	0.000320804	0.000936787
150771	ITPRIPL1	8.592586168	+?+	4.05285093	NA	3.288909865	3.670880397	0	0
10205	MPZL2	4.584700695	+++	5.741178862	1.05854536	1.894161177	2.8979618	2.27E-06	9.97E-06
5653	KLK6	5.585706883	-?-	-9.651979176	NA	-2.797366761	6.224672969	1.16E-08	7.24E-08
219539	YPEL4	10.01838363	---	-4.008096866	-2.177412664	-2.874935052	3.020148194	0	0
143503	OR51E1	5.377349202	+?+	6.175826309	NA	4.218534931	5.19718062	3.78E-08	2.17E-07
653604	HIST2H3D	3.758150428	++?	4.447690808	0.61619313	NA	2.531941969	8.56E-05	0.000279715
5630	PRPH	6.425769148	+++	7.233467517	2.060991027	3.56537097	4.286609838	6.56E-11	5.43E-10
64901	RANBP17	3.813410709	---	-4.336605713	-3.355996963	-1.327945173	3.006849283	6.85E-05	0.000228125
55314	TMEM144	8.180446295	---	-6.964805634	-3.949896528	-2.546250893	4.486984351	1.11E-16	1.62E-15
54751	FBLIM1	6.54809815	+++	4.951447387	2.290332091	3.343733224	3.528504234	2.91E-11	2.52E-10
5046	PCSK6	6.347014538	---	-7.594620439	-2.488239516	-2.543615559	4.208825171	1.10E-10	8.89E-10
221150	SKA3	7.324118317	+++	4.453358187	0.749207555	4.186511343	3.129692362	1.20E-13	1.31E-12
54504	CPVL	5.457341424	+-+	3.951909289	-0.166821632	3.372087428	2.49693945	4.83E-08	2.73E-07
101929074	PIK3CD-AS2	5.776833054	+?+	6.505942435	NA	3.971386273	5.238664354	3.81E-09	2.55E-08
8365	HIST1H4H	2.86593104	+++	2.945516741	1.344931652	0.750935156	1.680461183	0.002078924	0.005114924
92291	CAPN13	8.860687175	-?-	-7.10742423	NA	-3.825598012	5.466511121	0	0
85458	DIXDC1	10.21660323	---	-3.17994381	-1.624269262	-2.140503718	2.314905596	0	0
5860	QDPR	10.7855787	---	-4.054582541	-2.666825044	-2.304698338	3.008701974	0	0
768206	PRCD	6.428537466	-?-	-5.251051404	NA	-2.29573121	3.773391307	6.44E-11	5.35E-10
56995	TULP4	9.908220512	---	-2.629323971	-1.238809675	-2.072944168	1.980359271	0	0
10411	RAPGEF3	10.12335197	---	-3.638433064	-1.88657312	-2.581458327	2.702154837	0	0
3678	ITGA5	6.611378469	+++	3.858424369	1.635248184	3.036943879	2.843538811	1.90E-11	1.68E-10
322	APBB1	9.877603121	---	-2.526430954	-1.41742404	-2.242200901	2.062018632	0	0
100996301	FOXD3-AS1	8.125963464	+?+	9.526459246	NA	7.644803789	8.585631518	2.22E-16	3.17E-15
56256	SERTAD4	3.156885119	---	-4.398426379	-1.959010781	-0.922137019	2.426524726	0.000797321	0.00214182
6474	SHOX2	9.268580951	+++	8.346129657	1.710502419	8.621945896	6.226192658	0	0
83698	CALN1	10.23514857	---	-6.694169901	-4.10859656	-4.432587157	5.078451206	0	0
111	ADCY5	9.792227619	---	-3.390810161	-2.300669143	-3.230927715	2.974135673	0	0
182	JAG1	6.309622569	+++	4.471899393	1.146848412	2.560239252	2.726329019	1.40E-10	1.12E-09
9055	PRC1	6.464166529	+++	3.587149154	1.576740958	2.113885776	2.425925296	5.09E-11	4.29E-10
25806	VAX2	5.403236084	+?+	4.594064489	NA	2.928493308	3.761278898	3.27E-08	1.90E-07
675	BRCA2	7.053773825	+++	4.104627679	1.451309487	2.737428536	2.764455234	8.71E-13	8.75E-12
7020	TFAP2A	4.916539193	+++	5.47069442	1.539360513	3.908130054	3.639394996	4.40E-07	2.16E-06
100505576	LINC00672	6.175518928	---	-4.747049489	-2.697585205	-1.935315289	3.126649995	3.30E-10	2.52E-09
5228	PGF	5.279825141	+++	5.007085736	1.06032215	2.858514691	2.975307526	6.47E-08	3.59E-07
3672	ITGA1	5.310138396	+-+	3.569682566	-0.066947135	2.357947125	1.998192275	1.10E-07	5.90E-07
23166	STAB1	5.413506297	+++	4.208683253	1.662229778	2.387416994	2.752776675	3.09E-08	1.80E-07
64411	ARAP3	5.749447843	+++	3.316203511	1.608382258	2.027932848	2.317506206	4.48E-09	2.98E-08
55323	LARP6	9.846722397	---	-3.5472065	-1.229476253	-1.979101128	2.25192796	0	0
115584	SLC5A11	8.564238295	---	-8.487800498	-3.729825124	-3.510859493	5.242828372	0	0
79739	TTLL7	10.80314334	---	-3.974817961	-2.559050782	-2.741379114	3.091749285	0	0
9651	PLCH2	9.832339875	---	-5.341769187	-2.789715535	-3.692954519	3.941479747	0	0
641	BLM	5.316051213	+?+	3.355545565	NA	2.074204459	2.714875012	5.30E-08	2.98E-07
2770	GNAI1	9.106856516	---	-4.236133682	-2.535530407	-2.440740432	3.070801507	0	0
9771	RAPGEF5	10.01413505	---	-4.741736856	-1.721952726	-3.196514343	3.220067975	0	0
2700	GJA3	5.07304937	+?+	7.588028346	NA	4.532786113	6.06040723	1.96E-07	1.02E-06
4171	MCM2	7.072847067	+++	3.020660628	1.216996992	2.614180197	2.283945939	7.59E-13	7.68E-12
57709	SLC7A14	9.256255865	-?-	-6.382232286	NA	-4.040989266	5.211610776	0	0
100131320	RAB6C-AS1	6.978236883	-?-	-7.17765205	NA	-3.349910009	5.263781029	1.49E-12	1.47E-11
4481	MSR1	6.108624798	+++	3.64266916	0.266059203	3.976359577	2.628362647	5.02E-10	3.77E-09
1955	MEGF9	8.083484938	---	-2.965551873	-1.449611038	-1.365329389	1.926830766	3.33E-16	4.69E-15
274	BIN1	10.09989398	---	-3.428104482	-2.61316044	-2.299236492	2.780167138	0	0
9824	ARHGAP11A	7.794212557	+++	3.70320204	1.035085477	3.117993552	2.618760357	3.22E-15	4.13E-14
3426	CFI	5.647126791	+++	5.43375363	0.939550781	3.364805	3.24603647	8.16E-09	5.20E-08
55273	TMEM100	4.430122413	+++	4.209560419	0.989142187	2.393138695	2.530613767	4.71E-06	1.96E-05
4340	MOG	5.227197619	-?-	-9.838319913	NA	-2.675920063	6.257119988	8.60E-08	4.69E-07
347735	SERINC2	6.390365254	+++	4.369171291	1.440428194	3.713483676	3.174361054	8.27E-11	6.77E-10
5730	PTGDS	7.810154118	---	-6.410385327	-2.072287093	-2.826241081	3.769637834	2.89E-15	3.72E-14
4320	MMP11	4.317204069	+?+	4.052201014	NA	2.888972912	3.470586963	7.90E-06	3.15E-05
4998	ORC1	8.570168613	+++	4.799939094	1.185983816	4.30634009	3.430754333	0	0
116496	NIBAN1	6.465423574	+++	4.203306451	1.404423064	3.09555147	2.901093662	5.05E-11	4.26E-10
374986	MIGA1	9.958032901	---	-2.90500518	-1.839790222	-2.231396588	2.32539733	0	0
158399	ZNF483	10.75097243	---	-3.525535042	-3.027340991	-2.510660418	3.021178817	0	0
9976	CLEC2B	5.284616932	+++	4.033563674	1.313492626	2.577317801	2.641458034	6.30E-08	3.50E-07
3800	KIF5C	10.43600604	---	-2.705236793	-2.75597927	-3.099061134	2.853425732	0	0
5414	SEPTIN4	10.21239342	---	-5.756076328	-3.574721838	-3.13775609	4.156184752	0	0
1192	CLIC1	8.263554886	+++	4.419913366	1.675640848	3.362632825	3.152729013	1.11E-16	1.62E-15
2775	GNAO1	9.706512409	---	-3.89171135	-1.569241438	-2.735194172	2.732048987	0	0
222166	MTURN	10.27648556	---	-4.633388413	-3.11456492	-2.884267871	3.544073735	0	0
9625	AATK	9.816382476	---	-5.444856239	-2.458798901	-3.793057378	3.898904172	0	0
10150	MBNL2	9.907188522	---	-3.574175998	-1.384725053	-2.009233814	2.322711622	0	0
7018	TF	7.1013594	---	-6.661644625	-3.0633046	-2.602748805	4.109232677	6.18E-13	6.31E-12
1284	COL4A2	7.29398054	+++	5.862774144	1.633686881	3.875045772	3.790502266	1.50E-13	1.63E-12
29015	SLC43A3	8.137691422	+?+	3.507032423	NA	2.820618329	3.163825376	2.22E-16	3.17E-15
55861	DBNDD2	8.889187892	-?-	-5.984338181	NA	-2.944740422	4.464539301	0	0
121256	TMEM132D	9.236403344	-?-	-8.172631919	NA	-5.459472813	6.816052366	0	0
387758	FIBIN	7.092688358	+++	3.12603736	1.476928174	2.142010261	2.248325265	6.58E-13	6.68E-12
80303	EFHD1	6.791729278	---	-5.480804232	-2.234874836	-1.949356491	3.22167852	5.54E-12	5.13E-11
8999	CDKL2	10.52236331	---	-6.138540205	-3.549739271	-3.884774291	4.524351255	0	0
7045	TGFBI	6.686644344	+++	6.881583712	2.239557003	5.128646481	4.749929065	1.14E-11	1.03E-10
283848	CES4A	10.30219368	---	-6.003831737	-3.310666669	-3.93584168	4.416780029	0	0
2113	ETS1	3.845531208	+-+	3.005933172	-0.038863945	1.375821288	1.473539468	0.000120292	0.000382622
123606	NIPA1	10.15229489	---	-3.540072298	-1.633874552	-2.401061205	2.525002685	0	0
50940	PDE11A	5.170668511	-?-	-6.159194573	NA	-2.178642861	4.168918717	1.17E-07	6.26E-07
26082	LINC02249	5.894038154	+??	5.327625894	NA	NA	5.327625894	1.88E-09	1.32E-08
4327	MMP19	4.825979719	+++	6.97009667	2.948214095	2.543322143	4.153877636	6.97E-07	3.32E-06
30008	EFEMP2	5.85362545	+?+	3.020000943	NA	2.240902014	2.630451478	2.40E-09	1.66E-08
2894	GRID1	7.382645431	---	-2.796688658	-1.327328036	-1.840548463	1.988188386	7.76E-14	8.66E-13
5327	PLAT	4.592513761	+++	4.804646741	0.530056512	2.077646572	2.470783275	2.19E-06	9.63E-06
977	CD151	7.370615162	+++	4.125024782	1.731425581	2.393879795	2.750110053	8.49E-14	9.43E-13
10926	DBF4	8.074144717	+++	3.038651335	1.079490395	2.570859558	2.229667096	3.33E-16	4.69E-15
55010	PARPBP	7.308245665	+++	3.101472288	0.982816763	2.717495412	2.267261488	1.35E-13	1.47E-12
81930	KIF18A	9.243480881	+++	4.87358882	1.766807391	4.578779444	3.739725218	0	0
100507140	LINC01792	5.893142839	-?-	-6.973184821	NA	-3.010448691	4.991816756	1.89E-09	1.32E-08
4854	NOTCH3	5.060688919	+++	3.510256629	1.159587353	1.691562464	2.120468815	2.09E-07	1.08E-06
1052	CEBPD	5.624607521	+++	3.47327754	1.249478243	2.322108591	2.348288125	9.30E-09	5.89E-08
57142	RTN4	10.10882307	---	-2.603968288	-1.600943795	-1.299665799	1.834859294	0	0
54510	PCDH18	4.25961025	+-+	3.169109993	-0.17330218	1.983972997	1.775461723	2.05E-05	7.55E-05
791114	PWRN1	5.822353839	-??	-6.914570953	NA	NA	6.914570953	2.90E-09	1.98E-08
2882	GPX7	8.397084254	+++	2.898401986	1.025993814	3.177137875	2.367177892	0	0
8970	HIST1H2BJ	4.590700017	+++	3.408429821	3.073388673	1.928902461	2.803573652	2.21E-06	9.71E-06
3488	IGFBP5	4.882217573	+++	2.901522073	1.662455961	2.122741257	2.228906431	5.24E-07	2.55E-06
102524628	RASGRF2-AS1	5.808211349	-??	-5.342256999	NA	NA	5.342256999	3.16E-09	2.15E-08
101930421	LOC101930421	5.959706615	-?-	-8.67283483	NA	-2.883214258	5.778024544	1.26E-09	8.98E-09
157506	RDH10	5.310635853	+++	3.387423069	0.823264823	3.109791501	2.440159798	5.46E-08	3.06E-07
10314	LANCL1	10.12814746	---	-3.382186618	-1.63758277	-1.871271095	2.297013494	0	0
57475	PLEKHH1	9.988595285	---	-4.886909174	-2.466428775	-3.143991175	3.499109708	0	0
222698	NKAPL	5.177191673	---	-3.947624244	-1.521251458	-1.582544766	2.350473489	1.13E-07	6.06E-07
4036	LRP2	8.271406511	---	-8.192764392	-3.565630648	-3.387472497	5.048622512	1.11E-16	1.62E-15
3233	HOXD4	6.016358717	+?+	9.163729762	NA	6.712245855	7.937987809	8.92E-10	6.48E-09
9467	SH3BP5	7.048819705	---	-2.649271459	-0.516373248	-2.12447891	1.763374539	9.02E-13	9.05E-12
57698	SHTN1	9.409106751	---	-4.849748246	-1.429030094	-2.632540478	2.970439606	0	0
6579	SLCO1A2	10.01808854	---	-7.771124236	-4.806382097	-3.312974534	5.296826956	0	0
22875	ENPP4	6.095910634	---	-5.254377794	-3.152259842	-1.678472755	3.361703463	5.44E-10	4.06E-09
23136	EPB41L3	8.592923144	---	-3.868600602	-0.616081379	-2.747404274	2.410695418	0	0
23242	COBL	6.219742482	---	-2.874102708	-1.524650305	-1.646852905	2.015201973	2.49E-10	1.93E-09
3832	KIF11	6.624380949	+++	3.416203508	0.801525815	2.885966412	2.367898578	1.74E-11	1.54E-10
5354	PLP1	7.132721829	---	-7.414623848	-3.141804947	-2.787615416	4.448014737	4.92E-13	5.06E-12
7881	KCNAB1	10.59542651	---	-5.189430902	-3.861855016	-3.388472532	4.14658615	0	0
6452	SH3BP2	6.741941693	+++	2.531245342	1.52579584	1.408022764	1.821687982	7.81E-12	7.15E-11
286411	LINC00632	4.423240686	-?-	-5.888338938	NA	-2.107023805	3.997681371	4.86E-06	2.02E-05
203190	LGI3	9.64588895	---	-6.884815894	-3.279044108	-3.800421085	4.654760362	0	0
11167	FSTL1	7.479849512	+++	3.538114005	0.920726592	2.890490549	2.449777048	3.72E-14	4.29E-13
85360	SYDE1	9.395492768	+++	3.38616542	1.382526551	2.693929471	2.487540481	0	0
4833	NME4	9.519067921	+++	2.837683839	1.51024193	2.001545778	2.116490516	0	0
63827	BCAN	4.295196883	+++	2.759057563	1.37525405	2.183583599	2.10596507	8.73E-06	3.46E-05
79845	RNF122	5.589117951	+++	3.692098112	0.56685583	2.392612749	2.217188897	1.14E-08	7.11E-08
55603	TENT5A	6.531363912	+++	3.027814741	0.685056001	3.241268296	2.318046346	3.26E-11	2.80E-10
56662	VTRNA1-3	5.737425435	+??	6.436353321	NA	NA	6.436353321	4.81E-09	3.18E-08
83461	CDCA3	7.009503568	+++	3.417463935	2.196789161	2.216783236	2.610345444	1.20E-12	1.19E-11
121457	IKBIP	8.502588688	+++	3.162744483	1.066385657	3.0444402	2.424523447	0	0
10110	SGK2	8.668098466	---	-5.396898741	-1.317999813	-2.701157961	3.138685505	0	0
9899	SV2B	9.196305502	-?-	-8.23773269	NA	-5.501498513	6.869615601	0	0
64943	NT5DC2	8.304443244	+++	3.170981414	1.813186344	2.854087989	2.612751916	0	0
100129543	ZNF730	3.155858565	+++	3.385243061	0.350865232	1.825697871	1.853935388	0.000800132	0.002148742
5305	PIP4K2A	10.76714962	---	-5.016185656	-3.294113357	-2.897007906	3.735768973	0	0
64778	FNDC3B	6.878605934	+++	2.793060471	1.165816621	2.288242636	2.082373243	3.02E-12	2.86E-11
80005	DOCK5	8.472853579	---	-5.909463808	-2.784083735	-2.681513725	3.791687089	0	0
6659	SOX4	4.91855752	+++	3.96163743	0.332565437	3.190622928	2.494941931	4.36E-07	2.14E-06
10841	FTCD	5.440880702	---	-3.930144493	-1.703038909	-1.630013789	2.421065731	2.65E-08	1.56E-07
5590	PRKCZ	10.11440387	---	-3.068133404	-3.2175475	-3.501028325	3.26223641	0	0
2060	EPS15	8.421943693	---	-2.442016623	-0.757848326	-1.293290723	1.497718557	0	0
55789	DEPDC1B	6.782054096	+++	3.317481694	1.006680124	3.418364981	2.580842266	5.92E-12	5.48E-11
221061	FAM171A1	10.06681319	---	-2.861750594	-1.857274659	-2.260747082	2.326590778	0	0
9627	SNCAIP	5.582380997	+++	3.269228315	0.849953543	2.420305123	2.179828994	1.19E-08	7.37E-08
54	ACP5	3.855767881	+++	4.292677339	0.483306658	2.900594757	2.558859585	5.77E-05	0.000195137
220108	FAM124A	9.232230714	---	-5.533935827	-1.939865764	-2.424619906	3.299473832	0	0
64077	LHPP	7.059201511	---	-3.871096378	-1.111257373	-1.939234422	2.307196058	8.37E-13	8.43E-12
7757	ZNF208	3.792704536	---	-5.137232179	-2.281866725	-1.75739732	3.058832074	7.45E-05	0.000246364
7004	TEAD4	5.567028307	+++	4.349246904	2.462114777	1.555368754	2.788910145	1.30E-08	7.99E-08
6472	SHMT2	8.298840936	+++	2.746756577	1.986912437	2.04622129	2.259963435	0	0
9540	TP53I3	7.716238513	+++	4.533367415	0.923386254	2.587593515	2.681449061	6.00E-15	7.50E-14
5129	CDK18	6.334810379	---	-4.921060468	-1.379760187	-1.957941823	2.752920826	1.19E-10	9.59E-10
259232	NALCN	9.869044753	---	-3.363105174	-2.863132822	-2.946689975	3.057642657	0	0
118442	GPR62	9.241139971	---	-8.228128835	-2.243986534	-3.505123378	4.659079583	0	0
100289650	PSG8-AS1	5.63453641	-??	-6.600624448	NA	NA	6.600624448	8.78E-09	5.57E-08
389072	PLEKHM3	10.12984347	---	-2.310699875	-1.26223294	-2.492326661	2.021753159	0	0
64798	DEPTOR	6.158203237	---	-5.021133222	-2.118911609	-1.481639928	2.87389492	3.68E-10	2.80E-09
285555	STPG2	7.16844019	--?	-4.109209448	-3.738685199	NA	3.923947323	3.79E-13	3.94E-12
150209	AIFM3	8.655425337	---	-4.600813605	-3.739120313	-3.293210684	3.877714867	0	0
1277	COL1A1	5.064124407	+++	6.582629772	2.178873352	5.400517123	4.720673416	2.05E-07	1.06E-06
1909	EDNRA	4.803356928	+-+	3.839036267	-0.240955374	2.222216153	2.100735931	1.56E-06	7.06E-06
57185	NIPAL3	10.23325265	---	-4.435422392	-2.221597657	-2.54053537	3.065851806	0	0
4303	FOXO4	8.01983002	---	-3.193919273	-1.328570435	-1.640712956	2.054400888	5.55E-16	7.63E-15
1293	COL6A3	3.470247813	+?+	6.959460114	NA	4.100740289	5.530100202	0.000259989	0.000773632
10733	PLK4	6.127538856	+++	3.057491974	1.176226814	2.053397089	2.095705292	4.46E-10	3.37E-09
8502	PKP4	8.601490928	---	-2.989971137	-2.85823604	-1.760588702	2.536265293	0	0
83719	YPEL3	6.517067975	---	-2.410252799	-0.435845539	-1.211135248	1.352411195	3.58E-11	3.07E-10
59084	ENPP5	3.676088067	---	-5.642990106	-3.501859872	-0.85830867	3.334386216	0.000118419	0.00037719
666	BOK	8.146816817	-?-	-5.384788479	NA	-2.803316067	4.094052273	2.22E-16	3.17E-15
340419	RSPO2	6.934861801	---	-6.228193298	-3.525275164	-2.849727844	4.201065435	2.03E-12	1.96E-11
8632	DNAH17	8.805283739	---	-6.716578709	-1.664248338	-2.531158905	3.637328651	0	0
23492	CBX7	9.916248186	---	-3.060748942	-2.118609758	-2.969740371	2.716366357	0	0
4838	NODAL	4.601265429	+?+	5.730311831	NA	3.315345286	4.522828559	2.10E-06	9.28E-06
3381	IBSP	6.01782244	+++	8.056107743	2.531249887	5.933138433	5.506832021	8.84E-10	6.42E-09
9582	APOBEC3B	7.617179379	+?+	6.92359794	NA	5.20318019	6.063389065	1.30E-14	1.58E-13
100124700	HOTAIR	5.781525754	+?+	11.0535257	NA	9.023149938	10.03833782	3.70E-09	2.49E-08
3280	HES1	4.981568583	+++	3.029728985	1.670725533	1.209342362	1.969932294	3.15E-07	1.58E-06
25790	CFAP45	3.451525887	+++	4.019905599	0.860250973	2.453056769	2.444404447	0.000278713	0.000823726
10052	GJC1	7.509995798	+++	4.167076307	0.514310184	2.346846923	2.342744471	2.95E-14	3.44E-13
6664	SOX11	5.687346917	+++	5.190489342	0.981441168	3.95884564	3.376925383	6.45E-09	4.18E-08
9123	SLC16A3	5.680122265	+++	3.074889248	2.257459143	2.152446839	2.494931743	6.73E-09	4.35E-08
9735	KNTC1	6.054426721	+++	2.474083881	0.736302593	2.050549176	1.753645217	7.05E-10	5.18E-09
9644	SH3PXD2A	7.185942886	---	-3.199287633	-1.50562951	-2.080583725	2.261833623	3.34E-13	3.49E-12
5831	PYCR1	6.722289875	+++	3.128759848	1.700319339	1.871588657	2.233555948	8.94E-12	8.13E-11
4239	MFAP4	4.984453791	+++	5.668346704	1.185483854	3.182248604	3.34535972	3.11E-07	1.56E-06
8692	HYAL2	8.722896104	+++	2.616785568	0.988839844	2.318299651	1.974641688	0	0
115701	ALPK2	3.138921145	+?+	7.347729878	NA	2.780685113	5.064207495	0.000847855	0.002264286
771	CA12	5.382448772	+++	6.70365125	1.41913551	3.894375575	4.005720778	3.67E-08	2.11E-07
85445	CNTNAP4	8.403206531	---	-7.045919644	-4.005420144	-3.467419298	4.839586362	0	0
150590	C2orf15	4.808939373	-?-	-3.591633794	NA	-1.375914337	2.483774066	7.59E-07	3.60E-06
133584	EGFLAM	5.059493891	+?+	5.25433027	NA	3.171880088	4.213105179	2.10E-07	1.08E-06
401548	SNX30	7.942181649	---	-2.316598412	-1.020977317	-1.7090515	1.682209076	9.99E-16	1.34E-14
255187	SH3TC2-DT	5.507421938	-??	-5.783143149	NA	NA	5.783143149	1.82E-08	1.10E-07
100874362	HOXB-AS1	5.477908745	+?+	6.489384209	NA	5.421823818	5.955604013	2.15E-08	1.29E-07
2705	GJB1	4.716714875	-?-	-7.03357956	NA	-2.371982999	4.702781279	1.20E-06	5.52E-06
29941	PKN3	4.047238721	+++	3.450582395	0.370711967	1.229837884	1.683710749	2.59E-05	9.36E-05
1164	CKS2	7.552554852	+++	3.566712415	0.795325654	3.934244434	2.765427501	2.13E-14	2.52E-13
145864	HAPLN3	5.532485201	+++	4.35957146	0.72674767	2.312341926	2.466220352	1.58E-08	9.62E-08
56245	C21orf62	6.418315674	+++	6.624021043	1.811387625	4.270409069	4.235272579	6.89E-11	5.68E-10
388650	DIPK1A	6.86499481	---	-2.66259962	-1.513581502	-1.18678047	1.787653864	3.32E-12	3.14E-11
11226	GALNT6	7.941264323	---	-5.119169726	-1.286512134	-2.432511137	2.946064332	9.99E-16	1.34E-14
163175	LGI4	6.391659243	---	-3.505258786	-2.019832461	-2.156379667	2.560490304	8.20E-11	6.72E-10
2123	EVI2A	5.42122562	---	-5.82753714	-3.095388446	-1.482161897	3.468362494	2.96E-08	1.73E-07
80119	PIF1	6.006232724	+++	4.912549099	0.825103122	3.16621619	2.967956137	9.49E-10	6.86E-09
79628	SH3TC2	9.795184771	---	-6.134846216	-2.889650078	-2.850140303	3.958212199	0	0
54210	TREM1	5.773568446	+++	6.721136331	2.4945253	4.791543713	4.669068448	3.88E-09	2.60E-08
79789	CLMN	10.47988677	---	-4.679273751	-2.610319133	-2.411030731	3.233541205	0	0
57520	HECW2	10.42398775	---	-2.281370398	-2.332521444	-2.477768251	2.363886698	0	0
525	ATP6V1B1	7.003855961	+++	5.183864021	1.992139565	4.299085374	3.825029654	1.25E-12	1.23E-11
5158	PDE6B	6.075968675	-?-	-4.366516121	NA	-1.518279905	2.942398013	6.16E-10	4.56E-09
10529	NEBL	6.066741732	---	-4.203780844	-3.014682898	-1.509474261	2.909312668	6.53E-10	4.82E-09
140876	RIPOR3	4.357018711	+++	3.947523054	1.04477382	2.333292196	2.441863023	6.59E-06	2.67E-05
23348	DOCK9	10.64903652	---	-3.419246548	-2.567558449	-2.57099374	2.852599579	0	0
9021	SOCS3	2.875840933	+++	5.841152164	1.760497511	1.004697494	2.86878239	0.002014764	0.004973099
3161	HMMR	7.552683136	+?+	3.789550391	NA	4.184931868	3.98724113	2.13E-14	2.52E-13
51090	PLLP	6.962934578	---	-5.140954643	-2.774369808	-2.059752813	3.325025755	1.67E-12	1.62E-11
6373	CXCL11	3.157771924	+++	8.169668488	0.00930198	3.977606686	4.052192385	0.000794899	0.002137285
152926	PPM1K	9.142891261	---	-2.115026789	-1.835335775	-1.62889761	1.859753391	0	0
11270	NRM	9.137464587	+?+	3.34800649	NA	3.291330888	3.319668689	0	0
1780	DYNC1I1	9.653224959	---	-5.073915518	-3.765384311	-3.373048001	4.07078261	0	0
59338	PLEKHA1	10.83814696	---	-2.77724476	-2.454699859	-2.46353047	2.565158363	0	0
83875	BCO2	4.273390275	---	-3.239244907	-2.204567947	-0.91265461	2.118822488	9.63E-06	3.79E-05
57462	MYORG	5.67948841	---	-2.748041836	-1.226783628	-1.538277793	1.837701086	6.75E-09	4.36E-08
151648	SGO1	8.449243846	+++	5.610927455	1.480783568	5.227842789	4.106517937	0	0
5480	PPIC	7.458006971	+++	3.662315844	0.795456673	2.983382525	2.480385014	4.40E-14	5.03E-13
5910	RAP1GDS1	8.54634546	---	-2.162519389	-1.080251568	-1.20407674	1.482282566	0	0
1124	CHN2	9.183603656	---	-3.765082203	-2.374484685	-2.070611113	2.736726	0	0
283987	HID1	9.564924861	---	-3.07104617	-1.44711169	-2.630904832	2.383020897	0	0
7412	VCAM1	5.427779266	+++	4.341651957	1.248180445	2.989057697	2.859630033	2.85E-08	1.67E-07
10420	TESK2	7.863357675	---	-4.023038684	-1.454107448	-1.524565702	2.333903945	1.89E-15	2.47E-14
55450	CAMK2N1	9.774489306	---	-2.856681156	-1.504301792	-2.574937093	2.311973347	0	0
222223	KIAA1324L	7.620088687	---	-4.283912213	-2.714147711	-2.041992201	3.013350708	1.27E-14	1.54E-13
5796	PTPRK	8.920577906	---	-2.723389703	-1.871691033	-1.599088756	2.064723164	0	0
9705	ST18	7.904152871	---	-6.77139345	-3.486770809	-3.080768241	4.446310833	1.33E-15	1.76E-14
7057	THBS1	2.47336323	+++	4.863560149	0.706430913	1.606973893	2.392321652	0.006692401	0.014536448
84962	AJUBA	8.119084691	+++	4.829674249	2.146886442	3.088093732	3.354884808	2.22E-16	3.17E-15
2300	FOXL1	2.212787742	+?+	5.297794308	NA	0.877112051	3.087453179	0.013456141	0.02716592
57124	CD248	6.600828477	+++	4.892763187	1.328441141	3.483134405	3.234779578	2.04E-11	1.79E-10
54809	SAMD9	5.079815909	+?+	2.576343089	NA	2.536722706	2.556532897	1.89E-07	9.82E-07
51176	LEF1	4.747753097	+-+	2.591684783	-0.524330613	2.004315486	1.706776961	2.06E-06	9.11E-06
3234	HOXD8	6.61295604	+?+	10.67122938	NA	8.448517203	9.559873293	1.88E-11	1.66E-10
151174	LINC02610	4.256183408	-?-	-4.43891639	NA	-1.609742682	3.024329536	1.04E-05	4.06E-05
11174	ADAMTS6	5.488301572	+++	3.231053435	0.252529522	2.796747097	2.093443351	2.03E-08	1.22E-07
342035	GLDN	6.085583241	---	-5.730388592	-2.119547544	-1.919578422	3.256504853	5.80E-10	4.31E-09
55647	RAB20	6.938112632	+++	3.404897337	1.825763295	2.350562112	2.527074248	1.99E-12	1.92E-11
83592	AKR1E2	3.065474854	-?-	-3.663692623	NA	-1.199408692	2.431550658	0.001086623	0.002845504
81031	SLC2A10	6.119883621	+++	3.185018343	0.88587151	2.44163355	2.170841134	4.68E-10	3.53E-09
58473	PLEKHB1	5.987042447	---	-4.034184562	-1.880278414	-1.442698757	2.452387245	1.07E-09	7.67E-09
103689912	TBX2-AS1	6.464241794	+?+	5.63779709	NA	3.193236431	4.41551676	5.09E-11	4.29E-10
7164	TPD52L1	4.780475987	---	-3.322120202	-2.747718836	-1.245242585	2.438360541	8.74E-07	4.10E-06
5318	PKP2	4.537697732	---	-5.591120223	-2.728394859	-1.737152846	3.352222643	2.84E-06	1.23E-05
27022	FOXD3	5.753905461	+?+	8.943641608	NA	6.546305948	7.744973778	4.36E-09	2.90E-08
5136	PDE1A	10.35583542	---	-5.622584978	-3.946826351	-4.071989999	4.547133776	0	0
83871	RAB34	4.948105977	+++	3.305646652	1.379806226	1.920856966	2.202103281	3.75E-07	1.86E-06
7132	TNFRSF1A	6.563564021	+++	2.781182396	1.30705123	1.897599523	1.995277717	2.63E-11	2.29E-10
9046	DOK2	4.459805001	+++	4.519263751	1.005563685	2.622876782	2.715901406	4.10E-06	1.72E-05
24139	EML2	8.476038186	---	-2.89882519	-0.774428076	-1.937864426	1.870372564	0	0
9728	SECISBP2L	10.07434387	---	-3.281275683	-1.57385564	-1.885876513	2.247002612	0	0
285800	PRR18	10.21861535	---	-5.359158615	-2.947454187	-3.392737296	3.899783366	0	0
5396	PRRX1	7.098869786	+++	2.753826566	0.9657632	2.774789366	2.164793044	6.29E-13	6.41E-12
699	BUB1	9.43632655	+++	4.925072633	1.7170255	5.339344594	3.993814242	0	0
7163	TPD52	4.720629345	---	-2.50712094	-0.823009173	-1.166132204	1.498754106	1.18E-06	5.43E-06
56904	SH3GLB2	8.975478519	---	-2.076061172	-0.693090425	-1.851640739	1.540264112	0	0
3198	HOXA1	7.843283212	+?+	4.726322295	NA	6.967111328	5.846716812	2.22E-15	2.89E-14
541468	LURAP1	5.868734496	---	-2.70976623	-0.78477356	-1.039119304	1.511219698	2.20E-09	1.52E-08
3013	HIST1H2AD	3.370979154	+?+	3.717268427	NA	2.624357665	3.170813046	0.000374508	0.001080174
283849	EXOC3L1	3.532921174	+++	5.57866634	1.087957776	0.787098029	2.484574048	0.000205497	0.000624782
100129794	SLC25A21-AS1	3.637106935	---	-5.248241095	-1.700292693	-1.678606483	2.875713424	0.000137859	0.000433456
7079	TIMP4	6.377980977	+++	3.56597266	1.13697035	4.455516713	3.052819908	8.97E-11	7.33E-10
253982	ASPHD1	9.643915521	---	-4.845693668	-1.827997406	-2.853376022	3.175689032	0	0
2036	EPB41L1	10.2040958	---	-2.797642947	-1.624605376	-2.614881357	2.345709893	0	0
3690	ITGB3	5.222162186	+?+	4.166947798	NA	3.018070625	3.592509211	8.84E-08	4.81E-07
151647	TAFA4	8.607828891	---	-7.322345588	-2.90670641	-3.37234497	4.533798989	0	0
26271	FBXO5	7.711913923	+++	2.852492018	1.279464674	2.510315717	2.214090803	6.22E-15	7.75E-14
7105	TSPAN6	7.184153859	+-+	3.14201061	-0.04103245	3.067346206	2.083463089	6.76E-13	6.86E-12
26047	CNTNAP2	9.881001384	---	-6.620701214	-4.037568849	-4.262243019	4.97350436	0	0
29028	ATAD2	6.313689985	+++	2.534835445	0.931523602	1.967093973	1.811151007	1.36E-10	1.09E-09
6844	VAMP2	9.617473615	---	-2.924488177	-1.630237437	-2.58826562	2.380997078	0	0
346389	MACC1	6.571783399	+++	4.57099035	1.544101779	3.533190928	3.216094352	2.49E-11	2.17E-10
10135	NAMPT	5.068486742	+++	3.027839086	1.468432234	3.009412747	2.501894689	2.00E-07	1.04E-06
400451	FAM174B	9.738621762	---	-2.812899013	-1.400503347	-2.298316248	2.170572869	0	0
3383	ICAM1	2.746952845	+++	4.194055595	1.571405722	0.906460312	2.223973876	0.003007589	0.007102114
23500	DAAM2	4.936130486	---	-4.821217444	-2.80643998	-1.513937164	3.047198196	3.98E-07	1.97E-06
81624	DIAPH3	6.624760856	+++	4.208142882	2.06821569	2.366281603	2.880880058	1.74E-11	1.54E-10
23440	OTP	6.042787928	+?+	8.912130898	NA	7.043996969	7.978063933	7.57E-10	5.55E-09
9853	RUSC2	9.469818703	---	-2.598213124	-1.031538532	-2.609614697	2.079788784	0	0
374654	KIF7	4.169306801	+++	2.656576523	0.908173419	1.024439957	1.529729966	1.53E-05	5.79E-05
7044	LEFTY2	5.467575286	+?+	5.9458204	NA	4.808931274	5.377375837	2.28E-08	1.36E-07
80381	CD276	8.360641904	+++	3.004708137	1.367128312	2.718047626	2.363294691	0	0
10512	SEMA3C	2.690157489	---	-3.44046984	-1.466008205	-0.849242189	1.918573412	0.003570915	0.008281792
9768	PCLAF	8.695684855	+?+	4.102047981	NA	5.357651895	4.729849938	0	0
10797	MTHFD2	7.65636312	+++	2.629863981	1.466081775	3.193729375	2.42989171	9.55E-15	1.17E-13
2263	FGFR2	6.891586598	-?-	-4.082602684	NA	-2.036293957	3.059448321	2.76E-12	2.62E-11
3212	HOXB2	5.653984291	+?+	10.23303836	NA	6.444931719	8.338985042	7.84E-09	5.01E-08
51148	CERCAM	10.0142037	---	-4.035475628	-2.269046076	-2.452728356	2.919083353	0	0
25834	MGAT4C	3.975412654	-?-	-5.377688281	NA	-1.959009002	3.668348641	3.51E-05	0.000124133
221458	KIF6	4.539893402	---	-7.088181865	-4.441797971	-1.273436355	4.267805397	2.81E-06	1.22E-05
3371	TNC	7.523339794	+++	4.471279511	2.487354034	3.947265514	3.635299686	2.66E-14	3.13E-13
1289	COL5A1	4.596316077	+++	4.089730474	1.507254772	3.817608878	3.138198041	2.15E-06	9.48E-06
10170	DHRS9	3.289323229	---	-4.540870459	-4.532351931	-0.773006132	3.282076174	0.000502143	0.001409248
6790	AURKA	8.276794898	+++	2.934164487	2.329926152	3.25662085	2.840237163	1.11E-16	1.62E-15
1062	CENPE	6.008617461	+++	3.288941013	0.701806754	2.831723013	2.274156927	9.36E-10	6.78E-09
283078	MKX	2.233885455	-?-	-7.640176195	NA	-1.311756244	4.47596622	0.012745305	0.025882057
961	CD47	6.230123837	---	-2.08759051	-1.173386295	-0.865281686	1.375419497	2.33E-10	1.82E-09
8840	CCN4	3.760232213	+?+	6.417962968	NA	3.323816901	4.870889935	8.49E-05	0.000277596
2121	EVC	4.215571255	+++	2.655217476	1.278812064	1.485524085	1.806517875	1.25E-05	4.80E-05
23145	SSPO	3.749427366	---	-3.611095603	-0.887846334	-1.264228437	1.921056791	8.86E-05	0.000288853
5932	RBBP8	8.450542007	+++	2.376216574	0.71859891	2.59381508	1.896210188	0	0
5178	PEG3	9.084682052	-?-	-2.821833864	NA	-2.988610937	2.905222401	0	0
645784	ANKRD36BP2	6.612149322	-?-	-4.780054692	NA	-3.303690479	4.041872586	1.89E-11	1.67E-10
124602	KIF19	7.090726356	---	-5.758685977	-3.329725542	-2.749156882	3.945856134	6.67E-13	6.77E-12
5588	PRKCQ	9.062827203	---	-5.294876494	-2.220365893	-2.465702041	3.326981476	0	0
79172	CENPO	3.88490213	+-+	2.364936534	-0.085252014	0.985944864	1.145377804	0.000102371	0.000329744
8795	TNFRSF10B	5.630860911	+++	3.670873287	1.01052154	2.120624265	2.267339698	8.97E-09	5.69E-08
2014	EMP3	8.167088448	+++	4.571567381	2.254930034	3.693803212	3.506766876	1.11E-16	1.62E-15
53637	S1PR5	8.888198475	-?-	-6.548905076	NA	-3.298687775	4.923796425	0	0
5696	PSMB8	6.803074067	+?+	3.21288145	NA	2.955494997	3.084188223	5.12E-12	4.77E-11
256435	ST6GALNAC3	2.721812948	---	-4.474755424	-2.359892446	-0.378857976	2.404501949	0.003246244	0.007597107
83872	HMCN1	4.104055448	+?+	3.772783983	NA	2.734759381	3.253771682	2.03E-05	7.49E-05
2177	FANCD2	7.100470314	+++	3.310302325	0.854440432	2.943881947	2.369541568	6.22E-13	6.34E-12
288	ANK3	10.45395412	---	-4.820747636	-4.687974806	-4.008445522	4.505722655	0	0
2995	GYPC	4.319303673	+++	3.289959542	0.245541152	2.24083143	1.925444041	7.83E-06	3.13E-05
163255	ZNF540	9.077250916	-?-	-2.788462385	NA	-2.309419613	2.548940999	0	0
23022	PALLD	6.705946863	+++	2.676561567	0.967336272	2.00941703	1.88443829	1.00E-11	9.04E-11
170954	PPP1R18	8.081494358	+++	2.487296196	1.238191222	1.953963727	1.893150382	3.33E-16	4.69E-15
22822	PHLDA1	5.581718735	+++	2.621928002	0.862000418	2.117582214	1.867170211	1.19E-08	7.39E-08
94274	PPP1R14A	5.240547497	---	-5.097290458	-1.882046379	-1.700765762	2.893367533	8.01E-08	4.39E-07
147906	DACT3	8.038252445	---	-2.158931628	-1.049898425	-1.749635154	1.652821736	4.44E-16	6.17E-15
10265	IRX5	6.169496655	+?+	5.797157065	NA	5.581561945	5.689359505	3.43E-10	2.61E-09
9517	SPTLC2	6.964368047	---	-3.378287025	-1.193490858	-1.219245597	1.93034116	1.65E-12	1.61E-11
196410	METTL7B	7.852684212	+++	4.963196948	3.039406456	5.692562341	4.565055248	2.00E-15	2.61E-14
124976	SPNS2	7.360816257	---	-2.626673198	-0.687133408	-2.017089786	1.776965464	9.14E-14	1.01E-12
146691	TOM1L2	9.227187269	---	-2.155351809	-0.641242286	-1.974854289	1.590482795	0	0
4828	NMB	6.232376698	+++	3.46598525	1.380729044	3.647900109	2.831538134	2.30E-10	1.79E-09
115704	EVI5L	7.779343497	---	-2.078526675	-0.239748139	-1.632816369	1.317030394	3.66E-15	4.67E-14
3207	HOXA11	6.278162356	+?+	9.734587952	NA	9.532714468	9.63365121	1.71E-10	1.36E-09
8633	UNC5C	6.942464592	---	-5.533436089	-2.296167581	-2.556440862	3.462014844	1.93E-12	1.86E-11
4815	NINJ2	6.256507936	---	-5.47965487	-2.283129913	-1.88515045	3.215978411	1.97E-10	1.55E-09
6444	SGCD	5.581504329	---	-6.363785957	-1.9173707	-2.418288662	3.566481773	1.19E-08	7.40E-08
341	APOC1	6.30993879	+++	2.94997685	1.532112833	3.627938356	2.703342679	1.40E-10	1.12E-09
131578	LRRC15	4.001668059	+?+	9.209421788	NA	5.417140963	7.313281375	3.14E-05	0.00011209
825	CAPN3	6.437420817	-?-	-4.270939816	NA	-2.567805369	3.419372593	6.08E-11	5.06E-10
54899	PXK	10.20586048	---	-4.411248631	-1.894883352	-1.848589332	2.718240438	0	0
23287	AGTPBP1	10.35682526	---	-3.617311917	-2.402183548	-1.971140765	2.66354541	0	0
9837	GINS1	6.318623652	+++	3.32975476	0.426902746	2.639344493	2.132000666	1.32E-10	1.06E-09
9363	RAB33A	3.975770092	---	-3.501465085	-1.479047327	-1.402411644	2.127641352	3.51E-05	0.000123995
6440	SFTPC	7.404407651	---	-5.653154732	-2.379900287	-2.771178675	3.601411231	6.58E-14	7.43E-13
9472	AKAP6	10.40502034	---	-2.307404512	-2.073030718	-2.327833956	2.236089729	0	0
285	ANGPT2	6.974127094	+++	5.10105322	0.755575951	3.80630595	3.220978374	1.54E-12	1.50E-11
4642	MYO1D	7.705968883	---	-4.46016056	-2.380622489	-2.141860714	2.994214588	6.44E-15	8.02E-14
94031	HTRA3	4.161967912	+?+	4.128952612	NA	2.201990949	3.16547178	1.58E-05	5.96E-05
55038	CDCA4	6.839177241	+?+	2.795721659	NA	2.73924953	2.767485595	3.98E-12	3.74E-11
1104	RCC1	9.38812637	+++	2.660771718	1.369987915	2.69768019	2.242813275	0	0
890	CCNA2	8.529030081	+++	2.981678961	1.151881586	4.061218344	2.731592964	0	0
113451	AZIN2	5.759533072	-?-	-2.996552072	NA	-1.278830848	2.13769146	4.22E-09	2.81E-08
1137	CHRNA4	6.773790037	-?-	-4.216215368	NA	-3.313657826	3.764936597	6.27E-12	5.78E-11
254778	VXN	4.931103411	---	-2.366867219	-1.556889326	-1.255130589	1.726295712	4.09E-07	2.02E-06
3101	HK3	4.508726509	+++	4.857020389	1.669933644	2.200556695	2.909170243	3.26E-06	1.40E-05
3491	CCN1	3.260547638	+++	3.546336099	1.23174023	1.593092955	2.123723095	0.000555986	0.001545204
283455	KSR2	9.066513505	---	-6.99220442	-3.462535137	-4.129029218	4.861256258	0	0
85363	TRIM5	7.861465456	+++	2.9329592	0.749616154	2.877500229	2.186691861	1.89E-15	2.47E-14
283120	H19	6.237111726	+++	10.54199939	5.391630728	7.395595103	7.776408408	2.23E-10	1.74E-09
1894	ECT2	5.763699712	+++	2.678823625	0.810433557	1.768600161	1.752619114	4.11E-09	2.75E-08
6187	RPS2	9.637947565	+++	2.076837785	1.138295031	2.507163272	1.907432029	0	0
51776	MAP3K20	5.575613078	+++	2.371908263	0.369111215	1.29962551	1.346881662	1.23E-08	7.63E-08
10804	GJB6	7.435267166	-?-	-6.353994193	NA	-4.279699877	5.316847035	5.22E-14	5.94E-13
51196	PLCE1	2.657610982	+++	2.497196168	0.393592062	0.566102634	1.152296954	0.003934834	0.009018456
6900	CNTN2	9.108429459	---	-7.046590032	-2.605067792	-3.584652715	4.412103513	0	0
3627	CXCL10	4.827655165	+++	6.67452637	0.765344175	4.888620083	4.109496876	6.91E-07	3.29E-06
3490	IGFBP7	5.461083989	+-+	4.072596021	-0.050099746	3.221867457	2.448187741	4.73E-08	2.68E-07
23564	DDAH2	5.666418925	+++	2.442525251	1.276345978	1.039108797	1.585993342	7.29E-09	4.69E-08
22974	TPX2	8.215544017	+++	4.833716615	1.628880555	3.906395998	3.456331056	1.11E-16	1.62E-15
285780	LY86-AS1	9.054615019	-?-	-9.028028642	NA	-4.671298505	6.849663573	0	0
2151	F2RL2	4.588098392	+?+	5.385996252	NA	3.962177877	4.674087064	2.24E-06	9.83E-06
781	CACNA2D1	7.805714055	---	-4.11268383	-1.788717685	-2.683620208	2.861673908	3.00E-15	3.85E-14
51338	MS4A4A	4.984113928	+++	3.916900912	0.309984485	4.097029806	2.774638401	3.11E-07	1.56E-06
7516	XRCC2	5.897709795	+++	3.164508673	1.11962669	2.498226871	2.260787412	1.84E-09	1.29E-08
400961	PAIP2B	8.665282846	---	-6.258243251	-3.772254711	-2.717157372	4.249218444	0	0
55182	RNF220	9.927956642	---	-2.513568997	-1.96046069	-1.429894354	1.96797468	0	0
8605	PLA2G4C	5.890735698	---	-2.716310667	-0.828862101	-1.314052252	1.619741673	1.92E-09	1.34E-08
220965	FAM13C	10.23371124	---	-3.76522622	-2.749084258	-2.373600581	2.96263702	0	0
9260	PDLIM7	5.826075691	+++	3.167107314	1.582813038	1.888276856	2.212732403	2.84E-09	1.93E-08
4017	LOXL2	6.118376742	+++	4.267213499	1.755575321	4.105669098	3.376152639	4.73E-10	3.56E-09
653082	ZDHHC11B	5.119614922	-?-	-3.306381564	NA	-2.028991773	2.667686668	1.53E-07	8.05E-07
10783	NEK6	5.698314491	+++	2.642998995	1.957970574	1.587211501	2.062727023	6.05E-09	3.94E-08
79152	FA2H	7.675236347	---	-7.819271967	-2.342020942	-3.453204365	4.538165758	8.22E-15	1.01E-13
9671	WSCD2	9.048316318	-?-	-6.734456097	NA	-5.027509459	5.880982778	0	0
492311	IGIP	9.712639516	---	-2.300493287	-1.645423751	-1.928833303	1.958250114	0	0
91775	NXPE3	9.21153817	---	-3.151291221	-1.907178533	-1.678030135	2.245499963	0	0
2781	GNAZ	9.49882899	---	-2.348884257	-1.239879785	-2.197824933	1.928862992	0	0
28232	SLCO3A1	5.703869486	---	-4.070645998	-1.906215133	-1.60494225	2.527267793	5.86E-09	3.82E-08
64946	CENPH	7.516347635	+++	3.173787684	1.149669077	2.957921751	2.42712617	2.82E-14	3.29E-13
10457	GPNMB	3.582232983	+++	3.652642186	0.24443051	2.238973356	2.045348684	0.000170335	0.000527419
64762	GAREM1	4.604153534	---	-2.554992657	-0.64861633	-0.875394744	1.35966791	2.07E-06	9.17E-06
715	C1R	5.101777145	+?+	4.591214188	NA	3.150249261	3.870731725	1.68E-07	8.80E-07
11274	USP18	4.021621884	+-+	3.033847589	-0.359819665	1.938729706	1.777465654	5.78E-05	0.000195455
993	CDC25A	5.526877911	+++	4.718535272	0.813218801	2.707656654	2.746470242	1.63E-08	9.91E-08
23321	TRIM2	10.11204522	---	-2.507665372	-3.166847809	-1.859378224	2.511297135	0	0
123283	TARSL2	10.19213794	---	-3.019546476	-1.878371191	-1.975275302	2.291064323	0	0
80045	GPR157	4.40217597	+++	3.415193609	1.429436909	1.789356042	2.211328853	5.36E-06	2.21E-05
118932	ANKRD22	3.97081244	+-+	5.710236992	-0.638892341	2.539550407	2.962893247	7.16E-05	0.000237522
143425	SYT9	6.219242365	---	-7.359434466	-3.101361278	-2.430232619	4.297009454	2.50E-10	1.94E-09
9738	CCP110	10.16802157	---	-3.011803727	-1.54824044	-1.900334843	2.15345967	0	0
4641	MYO1C	4.041848693	+++	2.23948016	0.225469461	1.334365977	1.266438533	2.65E-05	9.56E-05
57007	ACKR3	5.950062956	+++	2.884849306	0.732023887	2.102667447	1.906513547	1.34E-09	9.50E-09
101954276	RNVU1-6	4.945312955	+??	4.084527786	NA	NA	4.084527786	3.80E-07	1.88E-06
1475	CSTA	6.549317837	+?+	5.060988488	NA	5.090134579	5.075561533	2.89E-11	2.51E-10
163071	ZNF114	3.986346433	+++	2.944074672	0.255769804	1.753787943	1.651210806	3.35E-05	0.000118942
9423	NTN1	6.711446041	+++	3.040400919	1.629285699	2.686192339	2.451959652	9.64E-12	8.73E-11
51659	GINS2	7.209474849	+++	3.119663525	1.231835098	3.18120555	2.510901391	2.81E-13	2.95E-12
2905	GRIN2C	7.909314398	---	-3.84845994	-2.312117939	-2.838929943	2.999835941	1.33E-15	1.76E-14
84790	TUBA1C	8.913351416	+++	3.041535611	2.126879705	4.216343097	3.128252804	0	0
23233	EXOC6B	9.887380565	---	-2.195314356	-1.224674958	-1.363962741	1.594650685	0	0
2173	FABP7	4.830664012	+++	4.680519477	1.836872763	2.493348983	3.003580408	6.80E-07	3.25E-06
55584	CHRNA9	4.20511137	+?+	9.237230495	NA	3.745206827	6.491218661	1.30E-05	5.01E-05
133	ADM	4.509690665	+++	5.326961528	2.647961694	2.276035981	3.416986401	3.25E-06	1.39E-05
4046	LSP1	5.166770951	+++	3.343368474	1.484131458	2.105742384	2.311080772	1.19E-07	6.38E-07
745	MYRF	7.247447732	---	-6.458637584	-1.996651418	-3.123858167	3.859715723	2.12E-13	2.27E-12
1318	SLC31A2	4.344969577	-?-	-4.373428462	NA	-1.514251769	2.943840116	6.96E-06	2.81E-05
55652	SLC48A1	7.537528768	---	-3.266099858	-0.760513256	-1.556031748	1.86088162	2.40E-14	2.83E-13
5820	PVT1	6.545569787	+?+	2.981941671	NA	2.380412679	2.681177175	2.96E-11	2.57E-10
55613	MTMR8	2.955877381	---	-3.044952943	-2.230587019	-0.65308831	1.976209424	0.001558905	0.003939203
150356	CHADL	4.290469819	---	-4.799489034	-0.668951103	-1.54028183	2.336240656	8.91E-06	3.53E-05
5360	PLTP	5.606103464	+++	2.256915794	1.677013591	2.439598431	2.124509272	1.03E-08	6.48E-08
5329	PLAUR	4.173238791	+++	3.602805195	1.338814256	1.64772058	2.196446677	1.50E-05	5.70E-05
256006	ANKRD31	3.134309489	-?-	-3.641250425	NA	-1.311800911	2.476525668	0.000861295	0.002294491
123920	CMTM3	9.24833946	+++	3.344657288	1.228093332	3.215867771	2.59620613	0	0
643680	MS4A4E	5.434227561	+?+	5.853149657	NA	4.18542045	5.019285053	2.75E-08	1.61E-07
347	APOD	3.139820846	---	-5.84021625	-3.395226063	-0.665384923	3.300275745	0.000845256	0.002258708
6792	CDKL5	9.028657421	-?-	-3.525355051	NA	-3.897298622	3.711326836	0	0
25878	MXRA5	4.658685689	+++	5.418305316	1.277899794	4.388369919	3.694858343	1.59E-06	7.19E-06
25987	TSKU	4.746836356	+?+	3.672322298	NA	1.887252383	2.779787341	1.03E-06	4.80E-06
54941	RNF125	4.760481493	-?-	-5.134251728	NA	-1.452404975	3.293328352	9.66E-07	4.51E-06
256126	SYCE2	3.843568437	+++	4.379423632	1.877916503	1.031681066	2.429673733	6.06E-05	0.000203966
55728	N4BP2	4.649670114	+++	2.114025521	0.524538556	0.964324643	1.200962907	1.66E-06	7.49E-06
85315	PAQR8	6.061457242	---	-3.860990878	-3.103547009	-1.326717731	2.763751873	6.74E-10	4.97E-09
9362	CPNE6	9.026862651	-?-	-6.689927786	NA	-4.863196163	5.776561974	0	0
1266	CNN3	7.218480729	+++	2.877836661	0.793164035	2.366645189	2.012548629	2.63E-13	2.78E-12
58516	SINHCAF	7.655003496	+++	3.37910681	1.044811581	3.870611138	2.764843176	9.66E-15	1.18E-13
9232	PTTG1	7.994492329	+++	4.744249905	1.328896574	3.667922306	3.247022928	6.66E-16	9.09E-15
4439	MSH5	3.890511612	+?+	2.953997267	NA	1.83289815	2.393447709	5.00E-05	0.00017161
79929	MAP6D1	8.296722393	---	-3.644849156	-1.992334898	-2.306468665	2.64788424	0	0
57562	CEP126	6.118343642	---	-4.944895	-1.829438004	-2.149347643	2.974560216	4.73E-10	3.56E-09
56977	STOX2	9.598103262	---	-2.363792333	-1.967055788	-2.465880379	2.265576167	0	0
1267	CNP	9.248288651	---	-4.255621705	-1.295047652	-2.493215874	2.681295077	0	0
398	ARHGDIG	9.699513777	---	-4.339886986	-2.915799339	-3.946380106	3.734022144	0	0
770	CA11	10.27396477	---	-4.416011447	-3.011375947	-3.528107349	3.651831581	0	0
56849	TCEAL7	4.653198455	---	-2.174463591	-1.675443415	-1.040869467	1.630258825	1.63E-06	7.37E-06
10865	ARID5A	3.910686643	+++	2.294722208	1.158232841	0.884852356	1.445935801	4.60E-05	0.000159169
9891	NUAK1	10.24973444	---	-3.149834574	-2.086300522	-3.024241583	2.753458893	0	0
80336	PABPC1L	5.316280535	+++	2.710372107	1.326556255	2.503648147	2.18019217	5.30E-08	2.98E-07
55176	SEC61A2	9.999516706	---	-2.049849826	-1.802060551	-1.913119519	1.921676632	0	0
6004	RGS16	2.559796791	+++	2.806569704	0.997604757	0.756541014	1.520238492	0.005236669	0.011669254
64782	AEN	6.270782005	+++	3.125938549	1.495868292	1.765691536	2.129166126	1.80E-10	1.42E-09
3741	KCNA5	3.54804114	-?-	-4.122652429	NA	-1.811180053	2.966916241	0.000194054	0.000592646
7005	TEAD3	5.271001059	+++	3.8529147	1.149689729	2.129381792	2.377328741	6.78E-08	3.75E-07
646424	SPINK8	6.552363476	+?+	5.248043414	NA	4.913231436	5.080637425	2.83E-11	2.46E-10
7414	VCL	4.050209261	+?+	2.451107781	NA	1.243467859	1.84728782	2.56E-05	9.26E-05
5355	PLP2	7.087540287	+++	3.742950222	1.627158818	4.141708512	3.170605851	6.83E-13	6.92E-12
55194	EVA1B	5.883932094	+?+	3.915582305	NA	2.510923349	3.213252827	2.00E-09	1.40E-08
8027	STAM	8.533636444	---	-1.988079513	-1.374809502	-1.249599495	1.53749617	0	0
805	CALM2	4.139439393	---	-1.954483299	-1.703126238	-0.532380824	1.396663454	1.74E-05	6.52E-05
9926	LPGAT1	10.28385965	---	-2.096756193	-2.379475862	-1.872844643	2.116358899	0	0
57447	NDRG2	4.9005072	---	-2.391133948	-2.236811337	-1.059952375	1.895965886	4.78E-07	2.34E-06
3991	LIPE	9.316446784	---	-4.132717536	-1.648192542	-2.812076072	2.864328717	0	0
80832	APOL4	5.946924989	+++	4.982704324	1.291417699	4.598316444	3.624146156	1.37E-09	9.67E-09
145447	ABHD12B	4.217069219	-?-	-4.447255705	NA	-1.256781806	2.852018756	1.24E-05	4.78E-05
7169	TPM2	4.379840179	+++	3.378324538	1.192579023	1.914847474	2.161917012	5.94E-06	2.43E-05
23313	KIAA0930	8.194178173	---	-2.744820128	-1.498486413	-1.564972625	1.936093055	1.11E-16	1.62E-15
441631	TSPAN11	4.981643666	+++	3.119124998	1.283707179	1.975318227	2.126050135	3.15E-07	1.58E-06
11031	RAB31	5.793038307	+++	2.429599157	0.256776278	1.650477839	1.445617758	3.46E-09	2.33E-08
9263	STK17A	7.207292606	+++	3.226206637	1.983228802	2.344634483	2.518023307	2.85E-13	3.00E-12
1464	CSPG4	4.711520291	+++	2.801297538	1.521409543	1.712283536	2.011663539	1.23E-06	5.66E-06
6751	SSTR1	9.011172026	-?-	-9.867439942	NA	-4.928092465	7.397766203	0	0
4283	CXCL9	4.693927187	+?+	4.388944349	NA	4.929069662	4.659007006	1.34E-06	6.13E-06
6591	SNAI2	4.789140434	+++	3.319763595	1.764645731	2.595957254	2.560122193	8.37E-07	3.94E-06
84034	EMILIN2	6.171827752	+++	3.207159167	2.125074581	2.675393597	2.669209115	3.38E-10	2.58E-09
199221	DZIP1L	6.740569695	+?+	2.798196526	NA	1.976725482	2.387461004	7.89E-12	7.22E-11
9398	CD101	4.084565097	+++	4.154403845	0.837170416	1.255164752	2.082246337	2.21E-05	8.09E-05
10644	IGF2BP2	5.57384179	+++	5.129252057	1.909568047	4.082557632	3.707125912	1.25E-08	7.70E-08
3339	HSPG2	5.220348878	+++	3.566230537	1.295130761	2.646110694	2.502490664	8.93E-08	4.86E-07
118429	ANTXR2	6.251303371	+++	2.859652886	0.566151193	2.735487043	2.053763707	2.04E-10	1.59E-09
3105	HLA-A	5.941447205	+++	2.937182319	1.664986616	2.636139366	2.412769433	1.41E-09	9.99E-09
55640	FLVCR2	5.443709972	+++	3.81066219	0.049225555	2.495641525	2.118509756	2.61E-08	1.54E-07
283420	CLEC9A	3.407064596	---	-3.72510904	-1.952297785	-1.115717864	2.264374896	0.000328328	0.000957536
56899	ANKS1B	9.728009018	---	-4.513653639	-3.576206715	-3.331799111	3.807219822	0	0
3760	KCNJ3	10.2437588	---	-7.243177241	-5.816417415	-4.44052898	5.833374545	0	0
89891	WDR34	6.417876164	+++	2.535626883	1.174299817	1.880609679	1.863512126	6.91E-11	5.70E-10
800	CALD1	6.996182815	+++	2.558083719	0.872955991	2.306262419	1.912434043	1.32E-12	1.30E-11
7368	UGT8	4.926191366	---	-6.461111234	-3.267684354	-2.062802488	3.930532692	4.19E-07	2.06E-06
79925	SPEF2	4.30941393	---	-3.513362756	-2.186732096	-1.413915727	2.37133686	8.18E-06	3.26E-05
4355	MPP2	8.892405093	---	-2.605210141	-0.978484838	-2.066997522	1.883564167	0	0
57478	USP31	10.09633758	---	-2.601081574	-1.480404639	-1.901723676	1.994403296	0	0
4023	LPL	6.039668723	+++	3.80601931	1.4115373	3.663644033	2.960400214	7.72E-10	5.65E-09
6543	SLC8A2	8.999530714	-?-	-7.074629517	NA	-5.211916682	6.143273099	0	0
407014	MIR25	5.002538287	+?+	5.003022677	NA	2.370722862	3.686872769	2.83E-07	1.43E-06
2633	GBP1	6.202039636	+++	4.456148043	1.60379364	3.67056691	3.243502864	2.79E-10	2.15E-09
5813	PURA	7.558967684	-?-	-2.041958734	NA	-1.174842769	1.608400751	2.03E-14	2.41E-13
1838	DTNB	9.41081341	---	-2.111524236	-1.116786326	-1.961794075	1.730034879	0	0
3628	INPP1	6.32067591	---	-2.851998016	-1.540709388	-0.836263159	1.742990188	1.30E-10	1.05E-09
64167	ERAP2	3.13853732	+++	3.322207515	0.173223495	2.455909183	1.983780064	0.000848967	0.002266592
55503	TRPV6	8.996890714	-?-	-5.748207353	NA	-4.147568894	4.947888123	0	0
7161	TP73	4.032783473	+?+	4.539227424	NA	2.944328702	3.741778063	2.76E-05	9.91E-05
54757	FAM20A	3.478949148	+++	3.899057912	0.80893382	2.332874737	2.34695549	0.000251692	0.000751629
9895	TECPR2	6.938945509	---	-2.003837696	-0.336351207	-1.566227505	1.302138803	1.98E-12	1.91E-11
81610	FAM83D	5.661489347	+++	3.646055846	1.357949378	2.846864938	2.61695672	7.50E-09	4.81E-08
2166	FAAH	9.754083511	---	-3.814054819	-2.036961915	-2.868343198	2.906453311	0	0
2012	EMP1	5.061968657	+++	4.486940578	1.475132782	2.266691769	2.74292171	2.07E-07	1.07E-06
221883	HOXA11-AS	5.331882219	+?+	8.548541564	NA	7.271062974	7.909802269	4.86E-08	2.75E-07
5359	PLSCR1	5.478352287	+++	2.447944091	0.426165743	2.353295705	1.742468513	2.15E-08	1.28E-07
140688	NOL4L	5.292699186	---	-2.178619904	-0.49080255	-1.346333049	1.338585168	6.03E-08	3.36E-07
6929	TCF3	6.714443585	+++	2.331123698	1.42398081	1.906139733	1.887081414	9.44E-12	8.56E-11
4953	ODC1	7.209774262	+++	2.717117072	1.152419544	2.053787637	1.974441418	2.80E-13	2.95E-12
7408	VASP	7.752124999	+++	2.263200307	1.505588211	1.753420193	1.840736237	4.55E-15	5.74E-14
11215	AKAP11	9.806688725	---	-2.227757168	-1.448114407	-2.127543577	1.934471718	0	0
84253	GARNL3	9.615042267	---	-2.312651953	-1.497638436	-2.447748646	2.086013012	0	0
2213	FCGR2B	5.133603097	+?+	4.372874931	NA	4.579266097	4.476070514	1.42E-07	7.53E-07
10898	CPSF4	5.717256289	+++	2.100426369	0.650109782	1.179633548	1.310056566	5.41E-09	3.55E-08
3201	HOXA4	6.185969783	+?+	8.430782621	NA	8.603275486	8.517029054	3.09E-10	2.37E-09
641700	ECSCR	5.857662146	+?+	4.245027949	NA	2.771090099	3.508059024	2.35E-09	1.62E-08
64641	EBF2	4.130819503	+?+	4.906984195	NA	4.331310697	4.619147446	1.81E-05	6.75E-05
3559	IL2RA	4.510233546	+?+	10.06083271	NA	5.927073386	7.993953049	3.24E-06	1.39E-05
11328	FKBP9	6.498784004	+++	2.639349013	1.250264264	1.890563964	1.926725747	4.05E-11	3.45E-10
143872	ARHGAP42	5.666481495	+++	2.70178581	0.531542689	1.679466612	1.63759837	7.29E-09	4.69E-08
26034	IPCEF1	10.67532362	---	-4.732847719	-3.842919352	-4.063295211	4.213020761	0	0
5638	PRRG1	7.712165377	-?-	-4.979981759	NA	-1.934641866	3.457311812	6.22E-15	7.75E-14
26240	FAM50B	5.747355188	---	-3.389332207	-0.790548147	-1.799161969	1.993014108	4.53E-09	3.01E-08
57406	ABHD6	5.481733375	---	-3.104981426	-1.170124346	-1.063405084	1.779503619	2.11E-08	1.26E-07
5819	NECTIN2	5.425635803	+++	2.306600629	1.079765584	1.432703973	1.606356729	2.89E-08	1.69E-07
23558	WBP2	6.947095688	---	-1.963053437	-0.808230253	-1.108924045	1.293402578	1.86E-12	1.81E-11
51761	ATP8A2	10.33123931	---	-6.529812148	-5.609537965	-5.317800973	5.819050362	0	0
5579	PRKCB	9.86861666	---	-5.374384369	-3.124394326	-4.389076661	4.295951785	0	0
23387	SIK3	9.378566131	---	-2.474245473	-0.982346406	-1.876378903	1.777656928	0	0
3625	INHBB	3.289476148	+++	3.105309317	1.213636383	1.020720153	1.779888618	0.00050187	0.001408698
9119	KRT75	3.317987396	+?+	8.35854687	NA	3.511732895	5.935139883	0.000453343	0.001283304
57381	RHOJ	5.634480572	+++	3.064556543	1.234181797	1.996109636	2.098282659	8.78E-09	5.57E-08
101927359	LOC101927359	4.518924958	-?-	-3.812323079	NA	-1.474302615	2.643312847	3.11E-06	1.34E-05
153328	SLC25A48	4.41547711	---	-5.506814881	-2.327641253	-1.756206091	3.196887409	5.04E-06	2.09E-05
171523	CYP2T1P	8.767685364	-?-	-4.15886373	NA	-2.084226848	3.121545289	0	0
10083	USH1C	2.102413679	-?-	-6.809187339	NA	-1.166552635	3.987869987	0.017758527	0.034659785
3017	HIST1H2BD	3.335275693	+++	2.38472391	1.23466322	0.962158014	1.527181714	0.000426074	0.001213805
27345	KCNMB4	5.145484087	---	-3.358938018	-1.482399321	-1.408973792	2.083437044	1.33E-07	7.10E-07
441459	ANKRD18B	4.949859362	-?-	-4.828710017	NA	-2.832599913	3.830654965	3.71E-07	1.84E-06
56833	SLAMF8	5.157360595	+++	4.709471047	1.253497211	3.501341645	3.154769968	1.25E-07	6.69E-07
2634	GBP2	6.405722333	+++	4.919425607	1.736958633	3.224090012	3.293491418	7.48E-11	6.15E-10
27087	B3GAT1	6.528549966	---	-2.346638779	-1.059485562	-1.835422266	1.747182202	3.32E-11	2.85E-10
2006	ELN	6.293850267	+++	2.904642903	1.970605381	2.952241112	2.609163132	1.55E-10	1.23E-09
780852	SNORD3B-2	4.641637961	+??	5.703442231	NA	NA	5.703442231	1.73E-06	7.77E-06
441869	ANKRD65	6.636894893	---	-4.251684875	-1.41724002	-2.034916971	2.567947289	1.60E-11	1.42E-10
286827	TRIM59	-5.096581948	-+-	-5.095965508	1.550809479	-1.852851033	2.833208673	3.46E-07	1.72E-06
22849	CPEB3	10.77566383	---	-4.027991304	-3.572362905	-3.736824536	3.779059582	0	0
93663	ARHGAP18	5.384133638	+++	2.983604604	0.566762618	2.068223215	1.872863479	3.64E-08	2.10E-07
202559	KHDRBS2	9.524192125	---	-5.218449171	-4.641640635	-3.830073632	4.563387813	0	0
55853	IDI2-AS1	4.106607214	-?-	-2.936457854	NA	-1.773014623	2.354736239	2.01E-05	7.41E-05
219333	USP12	9.442830018	---	-1.831525438	-1.103751668	-1.560531263	1.49860279	0	0
8994	LIMD1	6.791942616	+++	2.735247129	0.90040608	2.09005777	1.908570326	5.53E-12	5.13E-11
1718	DHCR24	6.308172181	---	-3.420074927	-2.043553326	-1.700904322	2.388177525	1.41E-10	1.13E-09
342510	CD300E	2.914600543	+?+	5.912011811	NA	2.331654054	4.121832933	0.00178072	0.004439681
9518	GDF15	5.675937039	+++	8.693078503	2.585197872	4.203536588	5.160604321	6.90E-09	4.44E-08
6843	VAMP1	9.826796195	---	-2.334116256	-4.713487962	-2.201373618	3.082992612	0	0
9706	ULK2	7.326836656	---	-2.064122101	-1.154743936	-1.384877584	1.534581207	1.18E-13	1.29E-12
55276	PGM2	7.517325897	+-+	2.165783485	-0.098395078	1.678340809	1.314173124	5.60E-14	6.35E-13
23232	TBC1D12	8.443071636	---	-3.568996534	-1.604240163	-1.434065609	2.202434102	0	0
1116	CHI3L1	6.004073258	+++	6.468584947	2.815277529	6.191911927	5.158591468	9.62E-10	6.95E-09
54892	NCAPG2	5.67492174	+++	2.28435479	1.024744054	1.607902754	1.639000533	6.94E-09	4.47E-08
5098	PCDHGC3	2.843310966	+?+	2.007141463	NA	1.096524651	1.551833057	0.002232374	0.005446375
57650	CIP2A	4.746216865	+++	2.267665709	1.01849844	1.192425585	1.492863245	1.04E-06	4.82E-06
115572	TENT5B	3.483907827	+?+	5.051930545	NA	2.30336386	3.677647202	0.000247075	0.000738684
11015	KDELR3	3.17936189	+++	4.334333588	0.122480386	2.596608291	2.351140755	0.000737998	0.00199652
23432	GPR161	3.564722342	+++	2.492555635	0.296809507	1.176971201	1.322112115	0.000182121	0.000559279
8642	DCHS1	3.757781846	+++	2.218866064	0.852302196	1.066609053	1.379259104	8.57E-05	0.000280078
4974	OMG	7.533457504	---	-4.767235606	-3.798422032	-2.168624943	3.578094194	2.48E-14	2.92E-13
6801	STRN	7.136357649	---	-2.928754528	-1.229306153	-1.165148041	1.774402907	4.79E-13	4.93E-12
257194	NEGR1	10.54666409	---	-6.448081031	-4.478221211	-4.012884075	4.979728773	0	0
202	CRYBG1	3.810550205	+++	3.697802932	1.484285979	2.333848808	2.505312573	6.93E-05	0.000230614
1026	CDKN1A	4.501699233	+++	3.902960811	1.821997587	1.646302601	2.457087	3.37E-06	1.44E-05
72	ACTG2	2.943165349	+-+	5.387761033	-1.833283317	3.77952998	3.66685811	0.003248749	0.007601997
1465	CSRP1	4.388617624	---	-3.387411978	-1.37347282	-0.999413489	1.920099429	5.70E-06	2.34E-05
200407	CREG2	10.26609434	---	-6.825388565	-5.101980517	-5.142119944	5.689829675	0	0
266722	HS6ST3	8.967305528	-?-	-6.863494657	NA	-4.512765712	5.688130185	0	0
3485	IGFBP2	8.30456565	+++	6.650415346	2.134553008	5.860058874	4.881675743	0	0
221400	TDRD6	6.629594084	---	-4.222374599	-2.07717745	-1.932386874	2.743979641	1.68E-11	1.49E-10
26052	DNM3	10.34476703	---	-2.760968065	-2.737745638	-3.129367304	2.876027002	0	0
9745	ZNF536	8.677505721	---	-4.43455211	-2.193884859	-3.522877058	3.383771343	0	0
100506725	LOC100506725	6.69300839	-?-	-5.106617386	NA	-2.261316765	3.683967075	1.09E-11	9.86E-11
10435	CDC42EP2	7.904149326	-?-	-3.434789826	NA	-1.893126063	2.663957945	1.33E-15	1.76E-14
56884	FSTL5	8.964795076	-?-	-7.62370086	NA	-4.457849627	6.040775243	0	0
5764	PTN	5.516082482	+++	2.574877775	1.364325245	1.99899116	1.97939806	1.73E-08	1.05E-07
1154	CISH	4.478522136	+++	3.481026383	0.760940867	2.454848935	2.232272062	3.76E-06	1.59E-05
143162	FRMPD2	7.543681755	-?-	-4.677380289	NA	-2.906645919	3.792013104	2.29E-14	2.70E-13
3214	HOXB4	5.683381251	+?+	8.150297513	NA	8.531937714	8.341117614	6.60E-09	4.27E-08
359845	RFLNB	2.717343722	+?+	3.501206835	NA	1.021292804	2.261249819	0.003290411	0.007688681
10385	BTN2A2	8.970599554	+++	2.561366686	0.917696201	2.27213661	1.917066499	0	0
284403	WDR62	4.299544859	+++	2.961242148	1.453709633	1.715241114	2.043397632	8.56E-06	3.39E-05
1604	CD55	5.374776598	---	-3.431068569	-2.04336211	-1.353929752	2.276120144	3.83E-08	2.20E-07
112597	CYTOR	4.807698865	+++	3.768398487	1.44495786	2.123940341	2.445765563	7.63E-07	3.62E-06
56990	CDC42SE2	6.173821606	---	-1.829121536	-1.300478612	-0.800333061	1.309977736	3.33E-10	2.55E-09
83641	FAM107B	7.775842102	-?-	-4.385086927	NA	-2.091331597	3.238209262	3.77E-15	4.80E-14
286097	MICU3	10.34976088	---	-2.378684612	-2.258566513	-3.000225084	2.545825403	0	0
11067	DEPP1	3.898756723	+++	4.4265722	1.170679364	1.680751646	2.42600107	4.83E-05	0.000166432
26298	EHF	2.121299572	-?-	-3.599944748	NA	-0.927034102	2.263489425	0.0169483	0.033262764
5331	PLCB3	4.237377247	+++	2.128958941	0.711915019	0.987328413	1.276067457	1.13E-05	4.39E-05
84918	LRP11	9.589034312	---	-2.102620398	-1.125082523	-2.304590601	1.844097841	0	0
100128385	FAM225B	2.525871267	+?+	4.648145277	NA	1.858296924	3.253221101	0.005770588	0.012727399
64376	IKZF5	6.997862681	---	-2.707989706	-1.34893473	-1.013207199	1.690043878	1.30E-12	1.28E-11
132864	CPEB2	7.370822749	---	-2.497582937	-1.655148293	-1.305520382	1.819417204	8.48E-14	9.43E-13
4122	MAN2A2	9.201705591	---	-2.30880904	-0.898890812	-1.72747723	1.645059027	0	0
196394	AMN1	7.946720921	---	-2.088829869	-2.120528274	-1.373899987	1.861086043	9.99E-16	1.34E-14
9348	NDST3	6.206331631	-?-	-7.472450361	NA	-3.435712893	5.454081627	2.71E-10	2.10E-09
387763	C11orf96	2.732777725	+++	2.87149997	0.99823315	0.711379252	1.527037457	0.003140135	0.007379901
19	ABCA1	5.49316576	+++	2.786628175	0.777525968	2.159191424	1.907781856	1.97E-08	1.19E-07
23429	RYBP	7.181913589	---	-2.292779622	-0.267898848	-1.252944336	1.271207602	3.44E-13	3.59E-12
64849	SLC13A3	6.905520139	---	-3.622481481	-2.079438175	-1.710680758	2.470866805	2.50E-12	2.39E-11
80705	TSGA10	5.663052265	---	-2.86870824	-1.882597098	-0.93166457	1.894323302	7.44E-09	4.77E-08
4281	MID1	3.657790072	+?+	2.299539637	NA	1.024620383	1.66208001	0.0001272	0.000402429
55026	TMEM255A	5.483248521	+++	3.011228695	1.120167424	2.071032831	2.067476317	2.09E-08	1.25E-07
101928509	LINC02268	2.079671542	+?+	4.573995633	NA	2.028377343	3.301186488	0.018777835	0.036439505
5789	PTPRD	7.625224757	---	-3.141608298	-0.1749021	-2.385916657	1.900809018	1.22E-14	1.49E-13
11095	ADAMTS8	8.099033911	---	-3.646145492	-1.907871981	-2.78554224	2.779853238	2.22E-16	3.17E-15
90634	N4BP2L1	5.486762153	---	-1.899870488	-1.035175546	-0.990969548	1.308671861	2.05E-08	1.23E-07
6525	SMTN	3.054906601	+++	2.582852176	0.347092182	1.023083439	1.317675932	0.001125653	0.0029368
306	ANXA3	6.31798045	---	-3.395558389	-3.919524412	-1.821007061	3.045363288	1.33E-10	1.06E-09
7128	TNFAIP3	3.771967078	+++	2.790272514	1.196717687	1.35921037	1.782066857	8.10E-05	0.00026614
55680	RUFY2	9.680348666	---	-2.031549402	-1.147612323	-1.53389398	1.571018568	0	0
9235	IL32	5.077205675	+?+	4.254097783	NA	2.935159689	3.594628736	1.92E-07	9.94E-07
400073	C12orf76	6.65743553	---	-2.263930184	-0.110001917	-1.421311834	1.265081312	1.39E-11	1.25E-10
54933	RHBDL2	7.830777992	---	-4.762260867	-2.438086889	-1.510342718	2.903563492	2.44E-15	3.17E-14
7015	TERT	4.669800494	+?+	4.191986682	NA	5.088231841	4.640109261	1.51E-06	6.84E-06
80013	MINDY3	6.452080392	---	-1.776992719	-2.539445161	-0.868675909	1.728371263	5.52E-11	4.62E-10
54718	BTN2A3P	7.604318225	+++	2.87419449	0.418224633	3.067048559	2.119822561	1.43E-14	1.73E-13
5287	PIK3C2B	2.772271317	---	-2.680832906	-0.7021512	-1.159117125	1.514033744	0.002783331	0.006635864
27147	DENND2A	5.818528042	+++	2.253939293	1.27045074	1.723791583	1.749393872	2.97E-09	2.02E-08
1291	COL6A1	4.599582863	+++	2.926541591	1.715416413	2.671642132	2.437866712	2.12E-06	9.34E-06
400043	LINC02381	6.447607547	+++	2.851043068	1.253812156	2.842428711	2.315761312	5.68E-11	4.75E-10
1306	COL15A1	2.663227108	+-+	3.430809948	-0.914271252	2.482363776	2.275814992	0.007739516	0.01655949
285313	IGSF10	6.431988653	---	-3.44264781	-1.288608885	-2.20970766	2.313654785	6.30E-11	5.24E-10
27106	ARRDC2	3.690613512	---	-2.922791435	-1.266943819	-0.788336853	1.659357369	0.000111857	0.00035747
753	LDLRAD4	7.276436195	---	-2.288297365	-0.231674554	-1.533710233	1.351227384	1.71E-13	1.85E-12
84441	MAML2	7.439266127	+++	2.183169454	0.805381656	2.140796516	1.709782542	5.06E-14	5.77E-13
8526	DGKE	10.11096287	---	-3.667212697	-2.766528575	-3.72813733	3.387292867	0	0
6277	S100A6	6.663261404	+++	3.601192921	1.404300835	2.826369686	2.610621147	1.34E-11	1.20E-10
3486	IGFBP3	6.262989879	+++	6.770301672	3.002308845	4.470068828	4.747559782	1.89E-10	1.49E-09
6175	RPLP0	8.728726524	+++	2.044469199	0.989696529	3.04621242	2.026792716	0	0
53344	CHIC1	9.8363703	---	-1.899318842	-2.134079771	-2.044234698	2.02587777	0	0
84695	LOXL3	8.535482943	+++	2.57165476	1.373126588	2.328979357	2.091253568	0	0
6121	RPE65	5.552362221	+++	5.494052266	1.685877918	3.744603787	3.641511324	1.41E-08	8.64E-08
3239	HOXD13	6.077131062	+++	11.75495392	1.593019974	9.91679109	7.75492166	6.12E-10	4.53E-09
4163	MCC	4.700714245	+++	2.746652004	1.006095363	1.105615983	1.61945445	1.30E-06	5.94E-06
8531	YBX3	6.689718309	+++	3.349530257	1.563221292	2.177497728	2.363416426	1.12E-11	1.01E-10
170689	ADAMTS15	4.990709441	+++	4.193046693	1.872297419	2.86988823	2.97841078	3.01E-07	1.52E-06
441179	LOC441179	4.529595923	+?+	11.04216454	NA	5.217474536	8.129819536	2.95E-06	1.27E-05
5337	PLD1	6.106102691	-?-	-4.365788851	NA	-1.929079221	3.147434036	5.10E-10	3.82E-09
4675	NAP1L3	10.08583802	---	-2.840897721	-2.151692542	-2.72527942	2.572623228	0	0
64005	MYO1G	4.654007095	+?+	3.295738143	NA	2.77210711	3.033922626	1.63E-06	7.35E-06
100131096	TNRC6C-AS1	5.263019769	---	-3.685852925	-2.169229689	-1.547199354	2.467427323	7.09E-08	3.91E-07
7782	SLC30A4	8.945130385	---	-1.872280687	-1.883636193	-1.118419042	1.624778641	0	0
100422986	MIR3125	4.448273134	+??	3.73782885	NA	NA	3.73782885	4.33E-06	1.81E-05
129049	SGSM1	9.347782667	---	-4.634486131	-2.074482815	-3.894529665	3.534499537	0	0
3290	HSD11B1	4.60459356	---	-4.875207297	-2.714183095	-1.758898536	3.116096309	2.07E-06	9.15E-06
147841	SPC24	7.634189308	+++	5.868356	1.775238406	4.160780771	3.934791725	1.13E-14	1.38E-13
23335	WDR7	9.917083842	---	-1.850420695	-1.3437751	-2.195320417	1.796505404	0	0
56975	FAM20C	4.469880885	+++	2.470457339	1.475896555	1.896650905	1.947668266	3.91E-06	1.65E-05
79956	ERMP1	6.185400406	---	-2.682425779	-0.456957263	-1.275524592	1.471635878	3.10E-10	2.37E-09
84302	TMEM246	8.315107574	---	-3.514879565	-1.779491549	-3.318942087	2.871104401	0	0
144811	LACC1	5.994810523	---	-3.630923044	-3.042403614	-1.645435403	2.772920687	1.02E-09	7.34E-09
9322	TRIP10	7.655657187	+++	2.644925593	1.319633771	2.080782807	2.015114057	9.66E-15	1.18E-13
22841	RAB11FIP2	9.644339856	---	-1.91899138	-1.087055823	-1.933406111	1.646484438	0	0
440519	ZNF724	3.750723689	+++	2.388897255	0.585101157	1.446955589	1.473651334	8.82E-05	0.000287557
8714	ABCC3	6.530672069	+++	5.553459621	3.545272595	5.285041883	4.794591366	3.27E-11	2.81E-10
100128927	ZBTB42	5.957809027	+?+	3.530354844	NA	2.669505109	3.099929976	1.28E-09	9.08E-09
5982	RFC2	7.449000974	+++	2.037195032	0.935685542	1.804208362	1.592362979	4.71E-14	5.38E-13
7955	RNF217-AS1	4.421727241	-??	-3.62307303	NA	NA	3.62307303	4.90E-06	2.03E-05
4886	NPY1R	6.641120028	-?-	-5.968390258	NA	-3.114035988	4.541213123	1.56E-11	1.38E-10
101926904	LINC01265	3.887581983	+?+	3.780422191	NA	2.11033917	2.94538068	5.06E-05	0.000173434
23593	HEBP2	5.74412317	+++	2.292399172	0.538218724	1.65671974	1.495779212	4.62E-09	3.07E-08
2861	GPR37	7.356386989	---	-6.189724776	-2.300116506	-2.236928612	3.575589965	9.45E-14	1.04E-12
4942	OAT	10.04371343	---	-1.884313232	-1.521882504	-1.550788401	1.652328045	0	0
51279	C1RL	5.03405462	+++	3.261069942	1.166912148	2.204524226	2.210835439	2.40E-07	1.23E-06
6274	S100A3	5.204951142	+?+	6.781877678	NA	3.366257234	5.074067456	9.70E-08	5.26E-07
712	C1QA	5.406970228	+++	2.92464452	1.497429281	2.734186071	2.385419957	3.20E-08	1.86E-07
401562	LCNL1	6.191344022	-?-	-4.839022865	NA	-2.8872407	3.863131783	2.98E-10	2.29E-09
23621	BACE1	6.428037076	---	-2.781139357	-0.694176397	-1.080579829	1.518631861	6.46E-11	5.36E-10
4130	MAP1A	10.0208867	---	-2.575761491	-2.305550498	-3.197130554	2.692814181	0	0
50515	CHST11	3.856889743	+++	2.015355833	0.664271292	0.821208847	1.166945324	5.74E-05	0.000194424
4170	MCL1	5.418025154	+++	2.122222412	0.679305438	1.141843606	1.314457152	3.01E-08	1.76E-07
56829	ZC3HAV1	6.099297547	+++	2.280644023	0.676723979	1.603051244	1.520139749	5.33E-10	3.97E-09
400619	LINC00511	6.351883347	+++	2.783652584	1.186147936	2.623585924	2.197795482	1.06E-10	8.62E-10
378884	NHLRC1	7.444900742	---	-3.062438808	-1.075265503	-2.322812506	2.153505606	4.85E-14	5.54E-13
221927	BRAT1	5.613454986	+++	1.873924268	1.094190711	1.217246841	1.395120607	9.92E-09	6.24E-08
5352	PLOD2	5.738491695	+++	2.264955914	1.762759938	2.191577136	2.073097663	4.78E-09	3.16E-08
84904	ARHGEF39	6.141833157	+++	3.78563849	0.828685481	2.718971306	2.444431759	4.08E-10	3.10E-09
55033	FKBP14	4.378089973	+++	1.967589439	0.272728207	1.158178058	1.132831902	5.99E-06	2.44E-05
389337	ARHGEF37	6.535739415	---	-3.456382627	-1.520342235	-1.763092068	2.246605643	3.16E-11	2.73E-10
26508	HEYL	3.017568716	+++	3.596008268	0.141913331	1.257359403	1.665093667	0.001274056	0.003277295
6422	SFRP1	2.677333647	---	-5.482939235	-0.757116141	-1.608011419	2.616022265	0.003710535	0.00856763
79712	GTDC1	10.05691195	---	-1.728815859	-1.74529231	-1.227256167	1.567121445	0	0
348654	GEN1	3.567998607	+++	2.008622025	0.151061109	1.235614329	1.131765821	0.000179859	0.000553448
151295	SLC23A3	4.377921478	+??	3.460698103	NA	NA	3.460698103	5.99E-06	2.45E-05
89795	NAV3	9.99173157	---	-4.103594348	-2.831261243	-2.894580169	3.276478587	0	0
79630	C1orf54	4.390511474	+-+	2.701321852	-0.162269356	2.042603703	1.635398304	1.13E-05	4.39E-05
6275	S100A4	5.513605582	+++	4.345753443	0.758656923	3.997412751	3.033941039	1.76E-08	1.07E-07
7301	TYRO3	9.29016522	---	-2.16343206	-1.259816427	-2.033441534	1.818896674	0	0
116443	GRIN3A	8.922871041	-?-	-6.217238498	NA	-4.583779874	5.400509186	0	0
29068	ZBTB44	7.51995675	---	-1.789709606	-0.490649797	-1.185327559	1.155228987	2.74E-14	3.21E-13
64285	RHBDF1	4.365938408	+++	2.339595144	0.92243595	1.2331695	1.498400198	6.33E-06	2.57E-05
57718	PPP4R4	8.92214209	-?-	-6.182125507	NA	-4.914427844	5.548276675	0	0
8916	HERC3	9.593187888	---	-1.956091834	-1.06456241	-1.570081382	1.530245209	0	0
5627	PROS1	5.849506523	+++	3.95376384	0.704147991	3.137590492	2.598500774	2.47E-09	1.70E-08
1808	DPYSL2	-4.999614236	-+-	-2.005067567	0.813050205	-1.214698429	1.344272067	5.74E-07	2.77E-06
91107	TRIM47	5.721579266	+++	2.50357096	1.404867528	1.862166259	1.923534916	5.28E-09	3.47E-08
401145	CCSER1	10.10426874	---	-4.826416678	-3.931732999	-3.708573967	4.155574548	0	0
29978	UBQLN2	7.593075571	---	-1.847550548	-0.218701943	-1.075302897	1.047185129	1.57E-14	1.88E-13
55332	DRAM1	6.246635427	+++	3.238494095	1.04303344	2.366768216	2.216098584	2.10E-10	1.64E-09
3306	HSPA2	9.286902783	---	-5.253799918	-2.300823369	-2.766826298	3.440483195	0	0
90865	IL33	3.114304491	+++	2.733937072	0.403300339	1.343213846	1.493483752	0.000921896	0.00244349
10758	TRAF3IP2	4.601090936	+++	2.798561551	0.484472947	1.313203128	1.532079208	2.10E-06	9.28E-06
4256	MGP	4.524222228	+?+	4.428749723	NA	3.648152756	4.03845124	3.03E-06	1.30E-05
6558	SLC12A2	9.761890578	---	-3.111950773	-1.997530255	-1.792631964	2.30070433	0	0
6941	TCF19	7.712428279	+++	3.085177919	1.665261297	3.295146853	2.681862023	6.22E-15	7.75E-14
23446	SLC44A1	4.231411177	---	-3.672367556	-2.00034171	-0.785449844	2.152719704	1.16E-05	4.50E-05
10399	RACK1	8.653997185	+++	1.974086484	1.240727526	2.026214797	1.747009603	0	0
25937	WWTR1	6.897221828	+++	2.845128192	2.145305213	2.68787224	2.559435215	2.65E-12	2.53E-11
36	ACADSB	9.947759321	---	-1.883044102	-1.98327671	-1.723042888	1.863121233	0	0
185	AGTR1	3.007258832	+?+	5.932862937	NA	2.326068854	4.129465895	0.001318076	0.003381978
2	A2M	3.882829062	+++	2.17527221	0.037803561	2.009041831	1.407372534	5.16E-05	0.000176563
83540	NUF2	7.874219519	+++	3.530893442	1.572478602	4.267179945	3.12351733	1.67E-15	2.18E-14
140707	BRI3BP	8.227360147	---	-1.789831364	-0.290464474	-1.375289857	1.151861898	1.11E-16	1.62E-15
645323	LINC00461	3.335662113	+-+	2.208027351	-0.285768049	1.443560155	1.312451852	0.000850965	0.002270604
2324	FLT4	4.653662942	+++	3.841454795	0.698112543	1.99373897	2.177768769	1.63E-06	7.36E-06
1482	NKX2-5	7.091482151	+?+	9.525341768	NA	9.922561246	9.723951507	6.63E-13	6.74E-12
64122	FN3K	8.94451657	---	-2.219823004	-0.875241302	-1.894338094	1.663134133	0	0
23769	FLRT1	5.194390234	-?-	-3.024597694	NA	-2.113286317	2.568942006	1.03E-07	5.55E-07
57224	NHSL1	4.118863674	+++	2.115630416	0.789633978	1.11305751	1.339440635	1.90E-05	7.07E-05
7106	TSPAN4	6.521420669	+++	2.824463851	1.114293384	1.639508819	1.859422018	3.48E-11	2.99E-10
114299	PALM2	8.91377306	-?-	-3.517668797	NA	-3.415644146	3.466656471	0	0
2491	CENPI	7.046012087	+++	2.704916242	0.855996759	3.040646291	2.200519764	9.21E-13	9.23E-12
813	CALU	6.26614023	+++	2.057302089	0.91952945	2.292593799	1.756475113	1.85E-10	1.46E-09
23148	NACAD	7.781605459	---	-2.479306032	-0.678846989	-1.878800416	1.678984479	3.55E-15	4.53E-14
57158	JPH2	3.261487438	+?+	3.60167135	NA	1.746495848	2.674083599	0.000554147	0.001540324
7056	THBD	2.507028173	+++	3.154490269	0.871342298	1.120194731	1.715342433	0.00608755	0.013360691
91624	NEXN	4.735899257	+++	2.669823353	0.234155095	2.440185594	1.781388014	1.09E-06	5.06E-06
4168	MCF2	7.83875224	-?-	-5.125379181	NA	-3.363629907	4.244504544	2.22E-15	2.89E-14
5954	RCN1	6.45347288	+?+	2.608456294	NA	1.882534622	2.245495458	5.47E-11	4.58E-10
10252	SPRY1	5.12752026	+?+	3.81493337	NA	2.688340028	3.251636699	1.47E-07	7.76E-07
284656	EPHA10	8.910753808	-?-	-4.469048671	NA	-3.919898826	4.194473749	0	0
255104	TMCO4	3.78034204	+++	2.976330114	0.030888717	1.788838081	1.598685637	7.83E-05	0.000257993
1033	CDKN3	5.598039516	+++	3.883930791	0.955947066	2.491879279	2.443919045	1.08E-08	6.76E-08
51029	DESI2	5.952683924	+++	1.851117775	0.585578535	1.946797258	1.461164523	1.32E-09	9.35E-09
1956	EGFR	5.243644684	+++	6.378793471	1.988266412	5.446613304	4.604557729	7.87E-08	4.32E-07
1800	DPEP1	6.307654819	+?+	10.71443323	NA	6.78855652	8.751494875	1.42E-10	1.13E-09
26470	SEZ6L2	6.531405522	---	-4.614880128	-1.292322363	-2.204386552	2.703863014	3.26E-11	2.80E-10
63895	PIEZO2	6.735864028	---	-4.54858274	-3.887894948	-2.20614963	3.54754244	8.15E-12	7.45E-11
4660	PPP1R12B	10.16251706	---	-2.113385461	-1.92031533	-2.020436956	2.018045916	0	0
85442	KNDC1	9.373682453	---	-4.4642208	-1.841809268	-3.463831726	3.256620598	0	0
27445	PCLO	9.92975555	---	-7.226004504	-3.261958289	-4.640261378	5.04274139	0	0
114800	CCDC85A	10.03323557	---	-5.514053075	-4.214424826	-4.097978842	4.608818914	0	0
4478	MSN	7.510710313	+++	2.457511814	1.187541964	2.338963624	1.994672467	2.94E-14	3.43E-13
90050	FAM181A	2.778711857	+++	2.991560259	1.095212638	1.08468269	1.723818529	0.002728746	0.006519037
1969	EPHA2	4.338164453	+++	4.393069323	1.514372085	1.521702152	2.476381187	7.18E-06	2.89E-05
4016	LOXL1	4.500705334	+++	4.010989683	1.783253826	3.198453782	2.997565763	3.39E-06	1.45E-05
4085	MAD2L1	6.012855104	+++	2.588527944	1.017554356	2.375521269	1.993867856	9.11E-10	6.61E-09
26030	PLEKHG3	9.697782159	---	-3.461766763	-1.762217608	-2.771556195	2.665180189	0	0
9220	TIAF1	7.22054911	-?-	-2.864922846	NA	-2.070245097	2.467583971	2.59E-13	2.74E-12
4921	DDR2	3.896470244	+++	2.562350482	0.890871589	1.692630894	1.715284322	4.88E-05	0.00016787
7439	BEST1	4.054580113	---	-3.343825196	-0.204972944	-1.353346528	1.634048223	2.51E-05	9.10E-05
11101	ATE1	9.839698537	---	-1.891306292	-2.105821731	-1.404288255	1.800472093	0	0
146802	SLC47A2	4.801676316	+++	5.554587329	1.297501309	3.763379881	3.538489506	7.87E-07	3.72E-06
653061	GOLGA8S	4.287168528	-??	-3.00610523	NA	NA	3.00610523	9.05E-06	3.58E-05
255877	BCL6B	2.621006029	+++	3.876291657	0.102977212	1.024660365	1.667976411	0.004383536	0.009939885
8324	FZD7	6.339312468	+++	3.240495605	2.159907362	2.914098405	2.771500458	1.15E-10	9.33E-10
3725	JUN	2.274955286	+++	1.92813275	2.250244994	0.305983429	1.494787058	0.011454306	0.023568769
26128	KIF1BP	9.673810035	---	-1.787527612	-1.277332936	-1.231313575	1.432058041	0	0
63967	CLSPN	4.516017616	+++	3.856524272	1.411606253	1.873877585	2.38066937	3.15E-06	1.35E-05
727851	RGPD8	4.681391371	-?-	-2.770535837	NA	-1.326910953	2.048723395	1.42E-06	6.48E-06
342865	VSTM2B	6.968051184	-?-	-5.54825517	NA	-3.43560867	4.49193192	1.61E-12	1.57E-11
4741	NEFM	10.13101235	---	-7.834332892	-7.047008807	-5.047160601	6.6428341	0	0
92922	CCDC102A	5.835450801	+++	3.086712217	1.549014634	2.034548983	2.223425278	2.68E-09	1.84E-08
196527	ANO6	6.927536086	+++	2.934761671	0.757206333	2.115426101	1.935798035	2.14E-12	2.06E-11
55092	TMEM51	5.617762278	+++	2.611720265	0.930138282	1.562449184	1.70143591	9.67E-09	6.10E-08
29774	POM121L9P	5.167023262	+++	4.555328687	2.240352895	3.317161538	3.370947707	1.19E-07	6.38E-07
3659	IRF1	5.047899089	+++	3.026052942	1.356563103	1.644544523	2.009053523	2.23E-07	1.15E-06
4837	NNMT	5.602682384	+++	5.87341213	2.11723358	5.57623312	4.522292944	1.06E-08	6.60E-08
948	CD36	3.038106715	+-+	2.709213005	-0.127261807	3.088255121	1.974909978	0.002380696	0.005769113
9670	IPO13	8.918799049	---	-2.477887532	-0.59555404	-1.379531005	1.484324192	0	0
85366	MYLK2	2.73928742	+++	2.800121978	0.404917427	0.982016643	1.395685349	0.003078626	0.007252094
4172	MCM3	6.928679337	+++	1.819560864	1.23447576	1.737347536	1.597128053	2.12E-12	2.05E-11
7852	CXCR4	6.107676832	+++	3.220426383	0.664667418	3.036079408	2.307057736	5.05E-10	3.79E-09
408263	FNDC9	8.900729162	-?-	-5.079930768	NA	-4.053214801	4.566572784	0	0
2785	GNG3	10.41265348	---	-6.591997259	-5.101111743	-3.957577397	5.216895466	0	0
84152	PPP1R1B	5.061415979	---	-2.720340793	-2.253050353	-2.172242007	2.381877718	2.08E-07	1.07E-06
11145	PLAAT3	5.403012085	---	-3.691565629	-1.390583318	-1.222565479	2.101571475	3.28E-08	1.90E-07
7791	ZYX	6.422724258	+++	2.26940046	1.400960934	2.049943141	1.906768178	6.69E-11	5.54E-10
94	ACVRL1	3.739282987	+++	2.755692913	0.341473723	1.296705384	1.464624007	9.23E-05	0.000299961
90529	STPG1	5.716876226	---	-3.115682444	-1.281931637	-1.848981055	2.082198379	5.43E-09	3.56E-08
10954	PDIA5	5.757951911	+++	2.964762373	0.57000742	2.649108634	2.061292809	4.26E-09	2.84E-08
2535	FZD2	5.168912384	+?+	3.008525209	NA	2.24115621	2.624840709	1.18E-07	6.32E-07
6424	SFRP4	5.326900591	+++	3.669514535	0.853198438	4.032025773	2.851579582	5.00E-08	2.82E-07
84823	LMNB2	4.197825747	+++	2.006522828	1.554807425	0.986990393	1.516106882	1.35E-05	5.15E-05
286186	LINC01299	7.535675112	-?-	-6.665262455	NA	-4.228579846	5.446921151	2.43E-14	2.87E-13
79745	CLIP4	9.016326677	---	-1.984551481	-1.431862901	-1.429792424	1.615402269	0	0
12	SERPINA3	3.914185941	+?+	4.0713359	NA	2.331705593	3.201520747	4.54E-05	0.000157159
440279	UNC13C	8.897377445	-?-	-7.027486104	NA	-4.629892001	5.828689052	0	0
30061	SLC40A1	4.470420316	+-+	2.251526652	-0.018461633	2.857437389	1.709141891	7.81E-06	3.12E-05
8340	HIST1H2BL	4.24446545	+??	4.624736401	NA	NA	4.624736401	1.10E-05	4.26E-05
56901	NDUFA4L2	5.177627307	+++	3.501949677	1.177567063	2.407613804	2.362376848	1.12E-07	6.05E-07
2050	EPHB4	5.7744371	+++	2.935560146	1.289786526	2.567350225	2.264232299	3.86E-09	2.59E-08
1466	CSRP2	6.808869486	+++	3.282762856	1.217942588	3.239614298	2.580106581	4.92E-12	4.59E-11
677839	SNORA71C	4.101201039	++?	3.23165169	1.151310935	NA	2.191481313	2.06E-05	7.58E-05
122773	KLHDC1	5.389681054	-?-	-2.212485659	NA	-1.021123915	1.616804787	3.53E-08	2.04E-07
5547	PRCP	4.758425871	+++	2.373060248	0.023063493	2.073999669	1.490041136	9.76E-07	4.55E-06
51690	LSM7	6.032584723	+++	2.087161386	1.118033958	1.716230749	1.640475364	8.07E-10	5.89E-09
139081	MAGEC3	4.22620252	-??	-4.882964124	NA	NA	4.882964124	1.19E-05	4.60E-05
157567	ANKRD46	5.843279603	---	-1.885858866	-2.258984147	-1.079047173	1.741296729	2.56E-09	1.76E-08
259217	HSPA12A	10.46782284	---	-3.601901989	-3.782439254	-3.679857036	3.688066093	0	0
9581	PREPL	8.893123655	-?-	-2.21627385	NA	-2.283012354	2.249643102	0	0
51123	ZNF706	4.060871774	---	-1.669638879	-1.127106644	-0.38481965	1.060521724	2.44E-05	8.88E-05
2805	GOT1	10.17112552	---	-2.953772768	-2.411909801	-2.892009697	2.752564089	0	0
216	ALDH1A1	2.829186754	---	-3.248793639	-2.604413562	-0.537306806	2.130171336	0.002333323	0.00566324
9576	SPAG6	3.927263851	---	-3.755549726	-2.599209574	-1.412304109	2.589021136	4.30E-05	0.000149268
1646	AKR1C2	2.245893331	-?-	-4.198029265	NA	-1.176293129	2.687161197	0.012355421	0.025190864
5502	PPP1R1A	5.220946098	---	-3.811211164	-2.448528727	-2.213835835	2.824525242	8.90E-08	4.84E-07
6036	RNASE2	4.881493344	+++	4.050589679	0.770192021	3.871037713	2.897273138	5.26E-07	2.55E-06
2637	GBX2	4.524203289	+?+	4.673260614	NA	4.60688248	4.640071547	3.03E-06	1.30E-05
9262	STK17B	5.870351675	+-+	2.144100576	-0.09318805	2.32470548	1.520664702	4.35E-09	2.90E-08
345557	PLCXD3	9.661129921	---	-5.331739062	-3.89088689	-3.858948819	4.360524923	0	0
5347	PLK1	7.309892175	+++	2.480482797	1.723145151	3.368617464	2.524081804	1.34E-13	1.46E-12
10609	P3H4	6.779814952	+++	2.645950814	1.268825883	1.820773828	1.911850175	6.02E-12	5.56E-11
255394	TCP11L2	2.611169462	---	-3.057827662	-1.032756838	-0.40627859	1.498954363	0.004511658	0.010211446
80162	PGGHG	3.144618552	+++	2.227977659	0.516811765	1.295966485	1.346918636	0.000831518	0.002225196
1006	CDH8	10.32894419	---	-4.610444794	-5.12026973	-4.198721509	4.643145344	0	0
8914	TIMELESS	6.749835814	+++	2.519626427	1.076055848	2.315503947	1.970395408	7.40E-12	6.79E-11
197257	LDHD	6.918795208	---	-3.057232949	-1.394544721	-1.902884691	2.118220787	2.28E-12	2.19E-11
9912	ARHGAP44	10.35636532	---	-5.366675354	-4.183490049	-4.341533012	4.630566138	0	0
2331	FMOD	4.211205824	+++	6.292416091	0.881761557	4.438783169	3.870986939	1.27E-05	4.89E-05
285962	WEE2-AS1	5.664378472	+++	2.305411902	0.215714722	2.41245509	1.644527238	7.38E-09	4.73E-08
5552	SRGN	3.633959003	+-+	2.49793923	-0.078255237	2.436348719	1.670847728	0.000279105	0.000824752
259230	SGMS1	7.582229156	---	-2.33789583	-1.692770681	-1.19022149	1.740296	1.70E-14	2.03E-13
222236	NAPEPLD	7.674971562	---	-2.019941776	-1.70376134	-0.939512915	1.554405344	8.33E-15	1.03E-13
7157	TP53	7.911367268	+++	2.592187944	1.451648637	2.578990257	2.207608946	1.22E-15	1.62E-14
401251	SAPCD1	4.695472426	+?+	3.180437278	NA	2.510364614	2.845400946	1.33E-06	6.08E-06
3300	DNAJB2	8.927037279	---	-1.969172121	-0.592334804	-1.684042988	1.415183305	0	0
6282	S100A11	6.109180141	+++	2.861101334	0.702977248	3.328428405	2.297502329	5.01E-10	3.76E-09
148534	TMEM56	8.77516911	---	-3.760496052	-3.41968002	-2.443113953	3.207763342	0	0
23604	DAPK2	5.601677776	---	-3.361829285	-2.218710803	-1.338566744	2.306368944	1.06E-08	6.63E-08
6781	STC1	3.397315675	+++	5.84966995	1.928141179	2.102372961	3.293394697	0.000340252	0.000989476
100874323	HOXA10-AS	3.45201436	+?+	8.638375036	NA	5.48463766	7.061506348	0.000278209	0.000822369
8871	SYNJ2	9.656179925	---	-3.924793978	-1.835230238	-2.95418038	2.904734865	0	0
2687	GGT5	4.551453158	+++	2.981807109	0.958519499	1.493902685	1.811409764	2.66E-06	1.16E-05
3263	HPX	2.602501812	+++	3.141004156	0.669337775	1.010573588	1.60697184	0.004627316	0.010439677
128414	NKAIN4	2.786300914	+++	2.758658913	0.918273692	1.756012731	1.810981779	0.002665668	0.006386096
100506211	MIR210HG	3.802439511	+?+	2.960118719	NA	1.994072236	2.477095477	7.16E-05	0.000237522
5494	PPM1A	9.362813465	---	-1.680593564	-1.034629371	-1.372143415	1.36245545	0	0
9447	AIM2	3.88143259	+?+	3.890424175	NA	2.807094877	3.348759526	5.19E-05	0.000177348
26507	CNNM1	10.0399439	---	-7.590911047	-5.055001927	-4.585555627	5.743822867	0	0
280	AMY2B	3.193652757	---	-2.091069517	-1.897072067	-0.563032379	1.517057988	0.000702425	0.001909874
85417	CCNB3	2.481154524	-?-	-3.549338701	NA	-1.012321998	2.28083035	0.006547879	0.014249574
90627	STARD13	6.26299601	---	-1.772064539	-1.081105085	-1.202267345	1.351812323	1.89E-10	1.49E-09
2530	FUT8	5.287345387	---	-2.670608111	-2.050889753	-0.703542355	1.808346739	6.21E-08	3.45E-07
3556	IL1RAP	5.234252908	+++	3.694798692	1.522392874	2.465401963	2.56086451	8.28E-08	4.53E-07
258010	SVIP	5.488929161	---	-3.955889458	-1.895919938	-1.593610983	2.481806793	2.02E-08	1.22E-07
9124	PDLIM1	4.834295354	+++	4.3519976	0.676569754	2.366586293	2.465051216	6.68E-07	3.19E-06
3070	HELLS	5.297222135	+++	2.653939949	0.536316575	2.492709827	1.894322117	5.88E-08	3.28E-07
23504	RIMBP2	8.881855442	-?-	-5.913883875	NA	-4.564784614	5.239334244	0	0
839	CASP6	8.360031929	+++	2.5108315	0.677711384	2.375066421	1.854536435	0	0
373	TRIM23	9.562253766	---	-1.629739842	-1.245934535	-1.623079336	1.499584571	0	0
4582	MUC1	5.739539605	+++	4.155525694	1.437206671	2.68749862	2.760076995	4.75E-09	3.14E-08
2122	MECOM	2.411888652	+++	2.681249201	0.066016499	1.018063975	1.255109891	0.007935064	0.016944234
56650	CLDND1	6.208345001	---	-3.756657557	-2.67020003	-1.291904536	2.572920708	2.68E-10	2.07E-09
85441	HELZ2	3.453490952	+++	3.031196213	0.433340384	1.594330018	1.686288872	0.00027669	0.000818805
29119	CTNNA3	5.962010192	---	-5.20845445	-3.190356651	-2.188726802	3.529179301	1.25E-09	8.86E-09
78995	C17orf53	7.008168268	+++	2.676078161	1.523860399	2.177563416	2.125833992	1.21E-12	1.20E-11
23308	ICOSLG	3.379396735	---	-3.490931152	-0.928799944	-1.308491824	1.90940764	0.000363225	0.001050612
64795	RMND5A	6.991056089	---	-1.772702897	-1.170607574	-1.136404869	1.359905113	1.36E-12	1.34E-11
85414	SLC45A3	7.223355286	---	-4.314979132	-2.228896029	-2.499771891	3.014549017	2.54E-13	2.69E-12
64850	ETNPPL	5.498183766	---	-4.806640424	-3.420308457	-2.425799429	3.550916103	1.92E-08	1.16E-07
286262	TPRN	8.11997359	---	-2.605531548	-0.186508834	-1.882613697	1.558218026	2.22E-16	3.17E-15
79006	METRN	4.1721192	+++	2.11651086	0.897866297	1.455038905	1.489805354	1.51E-05	5.72E-05
5725	PTBP1	9.221701029	+++	2.044628229	1.334347437	2.052016628	1.810330765	0	0
5351	PLOD1	6.682681762	+++	1.938561264	1.596780318	1.855396733	1.796912772	1.17E-11	1.05E-10
1016	CDH18	7.936426156	-?-	-7.34985374	NA	-4.109698159	5.72977595	9.99E-16	1.34E-14
85457	CIPC	6.863346864	---	-1.785906493	-0.582042286	-1.209542624	1.192497134	3.36E-12	3.18E-11
63901	FAM111A	7.188064856	+++	2.492123792	0.487454785	2.523811396	1.834463324	3.29E-13	3.44E-12
221914	GPC2	3.994614515	+++	3.70883353	1.016706319	2.639881895	2.455140581	3.24E-05	0.000115134
54443	ANLN	7.803332561	---	-3.912532115	-2.637657703	-1.98916036	2.846450059	3.00E-15	3.85E-14
54829	ASPN	3.557801213	+-+	4.76756255	-0.269168041	3.677441779	2.904724124	0.000373972	0.00107897
79850	FAM57A	6.754722783	+++	2.627915663	1.374974185	1.651790784	1.884893544	7.16E-12	6.57E-11
54567	DLL4	2.692071885	+++	3.329492335	0.764057855	0.650212326	1.581254172	0.003550482	0.008239619
151246	SGO2	7.085904892	+++	2.260406463	1.047972259	2.362733791	1.890370838	6.91E-13	7.00E-12
285220	EPHA6	8.874735306	-?-	-7.940926761	NA	-4.792884329	6.366905545	0	0
56660	KCNK12	9.681966553	---	-6.303649542	-2.986703039	-3.925317505	4.405223362	0	0
55220	KLHDC8A	5.8764987	+++	5.021321375	1.359715171	3.559072579	3.313369708	2.10E-09	1.46E-08
55240	STEAP3	7.037866732	+++	4.092546394	2.160747365	4.006564677	3.419952812	9.76E-13	9.77E-12
6405	SEMA3F	3.861040399	+++	3.634961661	1.131706651	1.676840898	2.147836403	5.65E-05	0.000191575
84467	FBN3	2.778132849	+?+	3.790960779	NA	2.338259207	3.064609993	0.002733613	0.006529228
57823	SLAMF7	4.69921153	+?+	3.839023889	NA	3.425221582	3.632122736	1.31E-06	5.98E-06
9725	TMEM63A	8.69520454	---	-3.811472051	-1.587960138	-2.264487637	2.554639942	0	0
54847	SIDT1	7.259366333	---	-3.771552722	-3.001784143	-2.269908107	3.014414991	1.94E-13	2.08E-12
11280	SCN11A	4.010118182	-?-	-3.057247825	NA	-1.515510564	2.286379194	3.03E-05	0.000108333
85415	RHPN2	3.759994959	+++	3.012933208	0.495940173	1.396914047	1.635262476	8.50E-05	0.00027781
27347	STK39	6.03980929	---	-1.842409402	-1.009480741	-0.940697256	1.2641958	7.71E-10	5.65E-09
1117	CHI3L2	4.479732267	+++	7.150430769	0.851695298	4.778882764	4.260336277	3.74E-06	1.58E-05
57509	MTUS1	4.684956271	-?-	-3.69914549	NA	-1.207425898	2.453285694	1.40E-06	6.38E-06
6261	RYR1	6.786214198	---	-2.919478804	-1.908334654	-1.875007966	2.234273808	5.76E-12	5.33E-11
101928079	SLC44A3-AS1	4.206353985	+?+	2.967273562	NA	1.605424588	2.286349075	1.30E-05	4.99E-05
6935	ZEB1	3.788387478	+++	2.409087343	0.898686579	0.984536882	1.430770268	7.58E-05	0.000250412
26232	FBXO2	9.174204292	---	-3.959549341	-2.703606971	-3.083214236	3.248790183	0	0
54149	C21orf91	5.773451429	---	-4.689912688	-2.659996293	-1.642334768	2.997414583	3.88E-09	2.60E-08
2180	ACSL1	2.767015038	---	-2.867509269	-0.908728384	-0.721390261	1.499209305	0.002828607	0.006725893
55771	PRR11	8.845109738	+++	2.370715512	1.588271295	2.819942698	2.259643168	0	0
11200	CHEK2	7.311982984	+?+	2.493093991	NA	2.666499753	2.579796872	1.32E-13	1.43E-12
113115	MTFR2	7.632028292	+?+	3.196671336	NA	3.40959994	3.303135638	1.15E-14	1.41E-13
8754	ADAM9	5.528467432	+++	2.061447506	0.902411759	1.911501231	1.625120165	1.62E-08	9.83E-08
10234	LRRC17	4.416089802	+++	3.344961773	0.598878786	3.183053068	2.375631209	5.03E-06	2.08E-05
5738	PTGFRN	5.412042167	+++	3.159579799	1.42295987	1.644073531	2.075537733	3.12E-08	1.81E-07
80763	SPX	3.33030575	-?-	-4.529659909	NA	-1.801451254	3.165555582	0.000433753	0.001233187
861	RUNX1	3.99149378	+++	2.335739151	0.125087886	2.419814699	1.626880579	3.28E-05	0.00011657
201895	SMIM14	4.259737258	---	-1.769670201	-1.024029109	-0.505552181	1.099750497	1.02E-05	4.00E-05
56978	PRDM8	8.572390728	---	-3.006331074	-3.034203271	-3.090014652	3.043516332	0	0
891	CCNB1	7.194719641	+++	2.991421427	1.757261423	3.0174109	2.588697917	3.13E-13	3.28E-12
158471	PRUNE2	3.165457326	---	-2.204160822	-0.868134718	-0.743481727	1.271925756	0.000774197	0.002085822
221074	SLC39A12	5.268790121	---	-3.79510705	-2.931464506	-1.845536459	2.857369338	6.87E-08	3.80E-07
6272	SORT1	7.370143525	---	-2.137696478	-1.32123081	-1.32395694	1.594294743	8.53E-14	9.46E-13
9844	ELMO1	6.565068236	---	-3.29243256	-1.521001477	-1.779925814	2.197786617	2.60E-11	2.27E-10
1890	TYMP	5.037388509	+++	3.256846544	1.408739938	2.230612736	2.298733073	2.36E-07	1.21E-06
5137	PDE1C	7.012161782	---	-3.288161967	-1.894608476	-2.117590939	2.433453794	1.17E-12	1.17E-11
105	ADARB2	8.862953321	-?-	-5.632530807	NA	-3.96969673	4.801113769	0	0
56241	SUSD2	4.176834595	+++	3.48044434	0.678674235	2.548587864	2.235902147	1.48E-05	5.62E-05
6319	SCD	8.532799364	---	-3.456409558	-1.380483149	-2.136768328	2.324553678	0	0
146057	TTBK2	9.5369171	---	-1.815851097	-1.385398704	-2.078014132	1.759754644	0	0
2736	GLI2	4.1741881	+?+	3.287832827	NA	2.350193972	2.8190134	1.50E-05	5.68E-05
529	ATP6V1E1	7.85729909	---	-1.875466095	-1.118573397	-1.309820853	1.434620115	2.00E-15	2.61E-14
160335	TMTC2	4.887513414	---	-3.30873133	-1.221521184	-1.077420627	1.869224381	5.11E-07	2.48E-06
4487	MSX1	5.721681847	+++	2.79355106	1.225529722	1.919377342	1.979486041	5.27E-09	3.47E-08
4685	NCAM2	7.703108666	---	-3.398971669	-2.056785328	-2.247236931	2.567664643	6.66E-15	8.27E-14
100506311	HOTAIRM1	6.677158623	+?+	4.861672873	NA	6.003837112	5.432754993	1.22E-11	1.09E-10
51104	ABHD17B	7.717261117	---	-2.725575147	-2.035556668	-1.295744698	2.018958838	6.00E-15	7.50E-14
10955	SERINC3	8.554325432	---	-1.655067296	-0.964341101	-1.051807884	1.22373876	0	0
169044	COL22A1	4.046651686	+++	4.843379099	1.320698839	2.930858614	3.031645517	2.60E-05	9.38E-05
29953	TRHDE	8.860305719	-?-	-6.810304751	NA	-5.485493853	6.147899302	0	0
51294	PCDH12	4.783611492	+++	4.233749702	1.134607313	1.795670775	2.388009263	8.61E-07	4.04E-06
100506474	LOC100506474	5.179990184	+++	4.625544036	1.799494955	3.092992649	3.172677213	1.11E-07	5.98E-07
10008	KCNE3	5.38990751	+++	3.306839965	0.537546553	2.475061	2.106482506	3.52E-08	2.04E-07
10801	SEPTIN9	5.839867704	+++	2.452326042	1.807168592	1.032041258	1.763845297	2.61E-09	1.80E-08
89853	MVB12B	5.792979284	---	-2.476614934	-1.490025685	-1.329700478	1.765447032	3.46E-09	2.33E-08
148808	MFSD4A	10.29933242	---	-5.189568237	-4.163157631	-4.117627577	4.490117815	0	0
159195	USP54	6.797615545	---	-3.576699347	-2.216277516	-1.531413052	2.441463305	5.32E-12	4.94E-11
3422	IDI1	8.102479842	---	-1.870106264	-2.175782845	-1.347312614	1.797733908	2.22E-16	3.17E-15
101929637	NTM-AS1	5.468641756	-?-	-6.750132043	NA	-2.640370881	4.695251462	2.27E-08	1.35E-07
51277	DNAJC27	8.966246397	---	-1.614898311	-0.924490479	-1.837729141	1.45903931	0	0
148641	SLC35F3	8.856951333	-?-	-5.662860006	NA	-4.19074152	4.926800763	0	0
79616	CCNJL	3.963811665	+-+	2.952451447	-0.032102089	1.642045771	1.542199769	7.38E-05	0.000243988
222008	VSTM2A	4.072590798	---	-7.014561159	-3.172467978	-2.316564409	4.167864515	2.32E-05	8.49E-05
90113	VWA5B2	8.856648041	-?-	-5.174175166	NA	-3.766645046	4.470410106	0	0
11240	PADI2	4.190995307	---	-4.452702985	-1.044086378	-1.342557723	2.279782362	1.39E-05	5.30E-05
10398	MYL9	3.362847609	+++	3.394048063	0.330463795	1.854577034	1.859696298	0.000385715	0.001110051
2023	ENO1	3.090725261	+++	1.799524408	1.069296706	0.477968593	1.115596569	0.000998341	0.002630503
10231	RCAN2	8.548043362	---	-4.577087827	-2.928062904	-2.952299982	3.485816904	0	0
58986	TMEM8A	6.143836777	+++	1.867458116	0.898492929	1.347886415	1.371279153	4.03E-10	3.06E-09
144423	GLT1D1	9.556249759	---	-5.443979064	-2.500242295	-4.443759336	4.129326898	0	0
8744	TNFSF9	4.250301908	-?-	-2.657376755	NA	-1.804918564	2.23114766	1.07E-05	4.16E-05
5037	PEBP1	7.132575602	---	-1.751783404	-0.986255879	-1.076330873	1.271456719	4.92E-13	5.06E-12
55313	CPPED1	3.854630505	---	-2.499393235	-0.79985775	-0.915631006	1.404960664	5.80E-05	0.000195902
23678	SGK3	4.124512678	-?-	-3.102276925	NA	-0.959236508	2.030756716	1.86E-05	6.92E-05
5937	RBMS1	5.532445268	+++	2.264865793	0.647548753	1.909677437	1.607363994	1.58E-08	9.62E-08
26119	LDLRAP1	4.624048441	---	-3.711461524	-0.812164836	-1.245803869	1.923143409	1.88E-06	8.40E-06
79989	TTC26	6.549457943	+++	1.885701207	0.83772031	2.010061022	1.577827513	2.89E-11	2.51E-10
9796	PHYHIP	8.852626563	-?-	-6.903547863	NA	-4.64111073	5.772329297	0	0
154761	LOC154761	5.417353327	+?+	3.607505776	NA	3.523903748	3.565704762	3.02E-08	1.76E-07
1573	CYP2J2	4.256075083	---	-3.57218791	-2.647174521	-0.977952476	2.399104969	1.04E-05	4.06E-05
3791	KDR	3.510415007	+++	2.716389619	0.282720099	1.23946942	1.412859713	0.000223704	0.000674315
286144	TRIQK	3.554275279	---	-2.241347355	-1.497630446	-0.65719335	1.465390384	0.000189511	0.000579545
55143	CDCA8	8.137786725	+++	3.285371874	1.766277465	4.191505937	3.081051759	2.22E-16	3.17E-15
51053	GMNN	5.829417743	+++	2.100070671	0.199773048	2.213910703	1.504584807	2.78E-09	1.90E-08
55553	SOX6	2.944626551	+++	1.952541355	0.562668571	1.215144066	1.243451331	0.001616723	0.004071262
2217	FCGRT	7.355786456	+++	1.971080962	0.97130494	2.401659641	1.781348514	9.49E-14	1.05E-12
7447	VSNL1	10.2202995	---	-7.442599848	-5.633320478	-4.790469119	5.955463148	0	0
1841	DTYMK	7.751616448	+++	2.038040808	1.467793395	2.37509848	1.960310894	4.55E-15	5.74E-14
1687	GSDME	6.445329661	+++	1.872572781	1.177709132	1.401138346	1.483806753	5.77E-11	4.81E-10
79844	ZDHHC11	2.962947935	-?-	-2.586126779	NA	-1.101724585	1.843925682	0.001523541	0.003857825
6529	SLC6A1	9.044980255	---	-2.301814021	-2.487058057	-2.4643777	2.417749926	0	0
84168	ANTXR1	5.533904064	+-+	1.876989476	-0.048490365	1.924949105	1.283476316	3.13E-08	1.82E-07
170371	TMEM273	3.665802989	---	-3.782540984	-2.255213341	-0.904468306	2.314074211	0.000123282	0.000391183
3756	KCNH1	9.661934927	---	-2.818781701	-2.129813548	-3.933207885	2.960601045	0	0
64423	INF2	8.927164096	---	-2.53067877	-0.777127119	-1.932915038	1.746906976	0	0
815	CAMK2A	9.938200611	---	-7.486519234	-5.844550923	-5.170837566	6.167302574	0	0
6493	SIM2	2.347566136	+++	5.126676863	0.497720048	1.337667763	2.320688225	0.009448259	0.019805982
116173	CMTM5	5.263901954	---	-4.046836893	-1.908569434	-1.657400162	2.537602163	7.05E-08	3.90E-07
5426	POLE	4.266218301	+++	1.978662961	0.787119709	1.288435236	1.351405969	9.94E-06	3.90E-05
89801	PPP1R3F	9.295151188	---	-2.199861538	-1.774338949	-2.348235145	2.107478544	0	0
1298	COL9A2	4.426807719	---	-3.386530732	-0.368454969	-1.454300919	1.736428873	4.78E-06	1.99E-05
3385	ICAM3	4.603703894	+?+	2.839028576	NA	2.063798734	2.451413655	2.08E-06	9.18E-06
2787	GNG5	8.546538088	+++	2.152781962	0.667282072	2.727466031	1.849176688	0	0
28965	SLC27A6	2.929644781	-?-	-6.019985978	NA	-1.437218178	3.728602078	0.001696748	0.004248831
10349	ABCA10	2.899456229	---	-2.585074124	-1.776540965	-0.943214334	1.768276474	0.001869053	0.004637185
11339	OIP5	8.043483785	+++	3.208678377	1.699272331	4.053413378	2.987121362	4.44E-16	6.17E-15
2561	GABRB2	8.84687813	-?-	-7.550324734	NA	-4.936799894	6.243562314	0	0
58472	SQOR	5.085440598	+++	2.534679028	0.303985426	2.309991253	1.716218569	1.83E-07	9.56E-07
5961	PRPH2	8.846272941	-?-	-4.245695514	NA	-3.875277958	4.060486736	0	0
3217	HOXB7	6.324694746	+?+	8.402459776	NA	7.940640784	8.17155028	1.27E-10	1.02E-09
169792	GLIS3	4.706941744	+++	2.346283658	0.927087895	2.068789959	1.780720504	1.26E-06	5.78E-06
5531	PPP4C	8.381301463	+++	1.710070204	0.898620635	1.853591278	1.487427372	0	0
54715	RBFOX1	8.845270325	-?-	-6.389783707	NA	-5.011855573	5.70081964	0	0
4214	MAP3K1	5.081196205	+++	1.93116106	0.650696472	1.667661452	1.416506328	1.88E-07	9.76E-07
1622	DBI	5.217652016	+++	2.622291236	0.447658256	2.288342612	1.786097368	9.06E-08	4.93E-07
57188	ADAMTSL3	4.449094256	---	-3.257533671	-2.634227272	-1.286644878	2.39280194	4.31E-06	1.80E-05
3162	HMOX1	4.450640531	+++	3.726281048	0.967945442	2.697116323	2.463780938	4.28E-06	1.79E-05
10000	AKT3	6.476534839	---	-1.811077881	-2.414985244	-1.350129163	1.858730763	4.69E-11	3.98E-10
4860	PNP	5.224340775	+++	2.018479181	0.623913237	1.511546451	1.38464629	8.74E-08	4.76E-07
58476	TP53INP2	2.938642616	---	-3.223149197	-1.421066904	-0.613656552	1.752624218	0.001648265	0.004142147
29116	MYLIP	4.296008062	---	-2.415010477	-1.272385536	-0.912077652	1.533157888	8.70E-06	3.45E-05
90007	MIDN	4.384775294	+++	2.014750014	1.074155403	1.120753177	1.403219532	5.81E-06	2.38E-05
64855	NIBAN2	4.97364006	+++	2.521500166	1.418203337	1.72654108	1.888748194	3.29E-07	1.64E-06
3679	ITGA7	4.114231289	+++	2.183141896	1.05036448	1.572297758	1.601934711	1.94E-05	7.20E-05
55700	MAP7D1	8.755768766	---	-1.904605029	-0.524294342	-1.482569124	1.303822831	0	0
29091	STXBP6	10.02007467	---	-3.455418864	-3.930047362	-3.648328285	3.677931503	0	0
9401	RECQL4	3.945596499	+++	3.302687311	0.890080147	1.474975838	1.889247765	3.98E-05	0.000139272
5346	PLIN1	5.4333428	---	-3.288876633	-0.409632191	-2.143613113	1.947373979	2.77E-08	1.62E-07
2162	F13A1	4.440772435	+++	4.585960125	2.453337542	4.385282961	3.808193542	4.48E-06	1.87E-05
23338	JADE2	5.651628556	---	-2.490759515	-0.5633059	-1.475624796	1.509896737	7.95E-09	5.07E-08
28513	CDH19	3.04496836	---	-6.285652891	-3.146382673	-1.281452749	3.571162771	0.001163524	0.003026121
2444	FRK	6.564339568	---	-3.401030501	-2.561486463	-1.87865306	2.613723342	2.61E-11	2.28E-10
11098	PRSS23	4.66396392	+++	3.023690122	0.322879287	2.412619761	1.919729723	1.55E-06	7.02E-06
6252	RTN1	8.774353828	---	-4.101772385	-0.822009862	-3.117109524	2.680297257	0	0
885	CCK	8.072995973	-?-	-7.674024727	NA	-4.151541438	5.912783082	3.33E-16	4.69E-15
54602	NDFIP2	8.450688184	---	-2.188162433	-1.756024146	-1.627174343	1.857120308	0	0
8341	HIST1H2BN	1.958512374	+++	2.341649257	1.322495543	0.331233597	1.331792799	0.02508496	0.047024672
2256	FGF11	2.382013578	+?+	2.336962024	NA	1.065640066	1.701301045	0.008609131	0.01822636
84333	PCGF5	2.815957381	---	-1.727588835	-0.874745298	-0.520832787	1.04105564	0.002431606	0.005876087
256021	LINC01619	3.728860879	+?+	2.954196706	NA	1.541193988	2.247695347	9.62E-05	0.000311535
10615	SPAG5	3.914122769	+?+	2.896920828	NA	1.493449614	2.195185221	4.54E-05	0.000157159
967	CD63	6.50798451	+++	1.913069113	1.20726889	2.205832153	1.775390052	3.81E-11	3.25E-10
54386	TERF2IP	9.399907463	---	-1.750728944	-0.863722694	-1.464573927	1.359675188	0	0
91703	ACY3	3.403198907	-?-	-3.986236136	NA	-1.537895323	2.76206573	0.000333009	0.000969952
100507246	SNHG16	6.603820477	+?+	2.013947488	NA	1.784873577	1.899410532	2.00E-11	1.76E-10
58475	MS4A7	3.864872495	+++	2.703936532	0.045878835	2.729427127	1.826414165	5.56E-05	0.000188837
1261	CNGA3	5.346709453	+++	3.572075258	1.997060716	3.973994166	3.18104338	4.48E-08	2.54E-07
143098	MPP7	9.969790899	---	-4.766907938	-3.388054984	-4.046125507	4.067029476	0	0
6258	RXRG	3.070177591	---	-3.633900972	-1.972556575	-1.177134514	2.261197354	0.001069658	0.002803088
23620	NTSR2	4.006176757	---	-3.926661035	-2.181500225	-1.749739362	2.619300207	3.09E-05	0.000110071
7109	TRAPPC10	7.056903374	---	-1.809156946	-0.698469374	-1.509788683	1.339138334	8.51E-13	8.57E-12
441194	PMS2CL	4.413439499	+++	1.776647517	0.830444725	0.911201844	1.172764695	5.09E-06	2.10E-05
23253	ANKRD12	6.424064136	---	-1.568968325	-1.485655105	-1.058105701	1.37090971	6.63E-11	5.49E-10
2358	FPR2	3.259621025	+-+	3.865290313	-0.076574634	3.863160808	2.601675251	0.001115612	0.002913092
29927	SEC61A1	8.21249229	+++	1.799518474	0.952076898	1.686744483	1.479446618	1.11E-16	1.62E-15
79816	TLE6	3.993388495	+++	3.337580485	0.624973954	2.147911803	2.036822081	3.26E-05	0.000115687
2903	GRIN2A	9.934815268	---	-6.364134397	-4.299897741	-4.666137865	5.110056668	0	0
56172	ANKH	5.435146483	---	-1.938707379	-1.289104247	-1.195804244	1.474538623	2.74E-08	1.61E-07
4237	MFAP2	4.567385944	+?+	7.676745516	NA	5.393491706	6.535118611	2.47E-06	1.08E-05
5427	POLE2	6.069362914	+++	2.78698262	0.332720793	2.865146142	1.994949852	6.42E-10	4.75E-09
3091	HIF1A	5.07722543	+?+	1.777738299	NA	1.669393666	1.723565983	1.91E-07	9.94E-07
602	BCL3	4.60242941	+++	3.782934213	1.286514163	2.088952983	2.386133787	2.09E-06	9.23E-06
79957	PAQR6	7.159542542	---	-2.83333337	-2.079260326	-2.021809102	2.311467599	4.05E-13	4.19E-12
51085	MLXIPL	4.783293185	---	-3.193755091	-1.141861909	-1.554247338	1.963288113	8.62E-07	4.05E-06
728833	FAM72D	5.653154569	+++	3.130538324	0.465954031	2.618150021	2.071547459	7.88E-09	5.04E-08
102724890	LINC02293	3.587847616	+?+	3.442002208	NA	3.187766876	3.314884542	0.00016671	0.000517155
6876	TAGLN	4.40549364	+++	2.546890953	1.556336111	2.295964418	2.133063827	5.28E-06	2.18E-05
2706	GJB2	2.518657066	+?+	5.512042193	NA	2.079665065	3.795853629	0.005890166	0.01296148
100287225	LINC01630	5.311704713	---	-5.14532073	-3.47137552	-2.192966084	3.603220778	5.43E-08	3.05E-07
11000	SLC27A3	3.936144226	+++	2.036306033	0.994602191	1.414479991	1.481796072	4.14E-05	0.000144292
5101	PCDH9	6.946878634	---	-3.155357573	-1.315803966	-1.901593819	2.124251786	1.87E-12	1.81E-11
90673	PPP1R3E	7.284721451	---	-1.973959639	-0.76919306	-1.623264397	1.455472365	1.61E-13	1.74E-12
113791	PIK3IP1	2.233360502	---	-2.274768542	-0.84787863	-0.364010713	1.162219295	0.01276259	0.025914284
64208	POPDC3	4.873058212	---	-4.209117596	-2.159829565	-2.020299245	2.796415469	5.49E-07	2.66E-06
57584	ARHGAP21	6.310802601	---	-1.831855032	-1.340209274	-1.162996456	1.445020254	1.39E-10	1.11E-09
79955	PDZD7	9.284659717	---	-3.388949011	-1.816894013	-3.307419572	2.837754199	0	0
6520	SLC3A2	4.486710924	+++	1.924173811	0.886368545	0.770360684	1.193634347	3.62E-06	1.54E-05
1287	COL4A5	5.363076048	---	-4.362915591	-1.132137771	-1.742898217	2.412650526	4.09E-08	2.33E-07
64123	ADGRL4	4.633584877	+-+	2.95399082	-1.43550051	2.099621377	2.163037569	3.59E-06	1.53E-05
54918	CMTM6	7.58237087	+-+	1.749122495	-0.129702378	2.012094014	1.296972962	3.40E-14	3.93E-13
9481	SLC25A27	9.056795007	---	-2.768037798	-1.1235573	-3.098328377	2.329974492	0	0
283335	LOC283335	5.454922191	-?-	-2.679205518	NA	-1.378809125	2.029007322	2.45E-08	1.45E-07
8438	RAD54L	5.464566094	+++	2.858459043	1.189290788	2.258180053	2.101976628	2.32E-08	1.38E-07
962	CD48	4.531056889	+-+	3.703199423	-0.087508784	3.733152176	2.507953461	5.87E-06	2.40E-05
10076	PTPRU	2.471829673	---	-2.292288709	-0.67156103	-1.097256851	1.353702196	0.006721177	0.0145903
5251	PHEX	5.831202747	+?+	3.085423135	NA	2.44856002	2.766991578	2.75E-09	1.88E-08
93323	HAUS8	7.075532635	+++	2.273460986	0.855343945	2.19812277	1.775642567	7.44E-13	7.53E-12
6657	SOX2	5.744645455	+++	2.117178255	0.568919495	2.029113198	1.571736983	4.61E-09	3.06E-08
9990	SLC12A6	6.677888239	---	-1.544282102	-0.815791558	-1.147927502	1.169333721	1.21E-11	1.09E-10
6646	SOAT1	7.008513924	+++	1.717279335	0.352057343	1.77235229	1.280562989	1.20E-12	1.20E-11
51351	ZNF117	3.616832047	+++	2.040665287	0.471331822	0.97576016	1.162585756	0.000149115	0.000466606
399671	HEATR4	4.544379835	---	-2.656711861	-0.504680136	-1.39384938	1.518413792	2.75E-06	1.19E-05
9459	ARHGEF6	4.85242271	+-+	1.954007449	-0.060040089	1.662113625	1.225387055	1.22E-06	5.62E-06
22989	MYH15	5.709184812	---	-3.829031185	-1.614671693	-1.977684328	2.473795735	5.68E-09	3.71E-08
154822	LINC00689	3.277647411	+?+	9.029205039	NA	4.504026844	6.766615941	0.00052338	0.00146302
5721	PSME2	5.799269259	+++	1.815816521	0.968920502	1.497470222	1.427402415	3.33E-09	2.26E-08
2729	GCLC	3.454458753	---	-2.187854576	-1.139817012	-0.470404962	1.266025517	0.000275699	0.000816532
79980	DSN1	4.937375637	+++	2.127461595	0.439122992	1.406142263	1.324242283	3.96E-07	1.96E-06
9636	ISG15	2.737825825	+++	2.800275232	0.449350997	1.957081183	1.735569138	0.003092341	0.007279721
7405	UVRAG	8.654715194	---	-1.928087117	-1.310064311	-0.936246527	1.391465985	0	0
5244	ABCB4	5.140059733	+++	3.660803532	0.209879786	2.236913073	2.035865463	1.37E-07	7.29E-07
5054	SERPINE1	4.928867314	+++	4.83164027	2.030464925	3.846639654	3.569581616	4.14E-07	2.04E-06
23554	TSPAN12	5.888853313	+++	3.625695209	1.601613698	3.020924574	2.74941116	1.94E-09	1.36E-08
55328	RNLS	3.373195554	---	-2.804156284	-1.788645016	-0.66326905	1.75202345	0.000371506	0.001073037
57405	SPC25	7.091168587	+++	2.181802722	1.586120673	3.884454825	2.55079274	6.65E-13	6.75E-12
51700	CYB5R2	5.097394002	---	-4.056058061	-1.633898264	-1.713815486	2.467923937	1.72E-07	9.00E-07
11223	MST1L	3.323223718	+?+	3.086638067	NA	2.102526819	2.594582443	0.000444918	0.001261989
51530	ZC3HC1	5.282066996	+++	1.684402111	0.696597811	1.45389839	1.278299438	6.39E-08	3.55E-07
10079	ATP9A	9.410679924	---	-1.88313617	-1.107269364	-2.369380852	1.786595462	0	0
54852	PAQR5	2.656692519	---	-3.05504311	-2.244675001	-0.489532885	1.929750332	0.003945569	0.009038536
168090	C6orf118	4.600793278	+++	3.311333099	0.952366505	2.910657432	2.391452345	2.10E-06	9.29E-06
101929468	CXXC4-AS1	3.861790077	-??	-3.670585659	NA	NA	3.670585659	5.63E-05	0.000191059
3232	HOXD3	5.403913851	+?+	4.655729728	NA	5.165815488	4.910772608	3.26E-08	1.89E-07
3106	HLA-B	5.381638969	+?+	2.965467934	NA	2.620703193	2.793085564	3.69E-08	2.12E-07
285668	C5orf64	4.031136634	-?-	-3.542085559	NA	-1.521680799	2.531883179	2.78E-05	9.97E-05
159	ADSS	4.055819507	---	-1.674552976	-0.739374567	-0.800677117	1.071534886	2.50E-05	9.06E-05
6185	RPN2	7.63922613	+++	1.781449293	0.632920279	1.582168146	1.332179239	1.09E-14	1.33E-13
387486	LINC00320	6.417177213	-?-	-8.076263035	NA	-2.91999444	5.498128737	6.94E-11	5.72E-10
5570	PKIB	3.526576562	+++	3.815152404	1.23673266	1.675638321	2.242507795	0.000210485	0.000638673
22864	R3HDM2	5.468100768	---	-1.773231289	-0.930688301	-1.136602825	1.280174138	2.27E-08	1.35E-07
56895	AGPAT4	7.731420401	---	-2.099318619	-0.966356714	-1.727441568	1.597705634	5.33E-15	6.69E-14
1896	EDA	2.098397245	-?-	-2.564920046	NA	-0.683120485	1.624020266	0.017935034	0.034950975
1849	DUSP7	7.590261151	---	-2.553602334	-0.889689962	-1.693215691	1.712169329	1.60E-14	1.92E-13
8482	SEMA7A	4.160502825	---	-2.070872438	-1.185340822	-1.183757112	1.479990124	1.59E-05	6.00E-05
5260	PHKG1	4.178918891	+++	3.558267583	1.845012165	2.690357775	2.697879174	1.46E-05	5.57E-05
4900	NRGN	9.970266535	---	-5.68776029	-4.735781764	-4.383719071	4.935753709	0	0
26035	GLCE	2.914083465	---	-1.605978676	-1.20435624	-0.485605241	1.098646719	0.001783673	0.004446436
729085	GASK1A	2.796340027	+?+	2.452846357	NA	1.21372823	1.833287293	0.00258425	0.006208911
129285	PPP1R21	9.071579311	---	-1.674875445	-1.025848546	-0.97498418	1.225236057	0	0
165	AEBP1	5.849369813	+++	3.005284837	2.412550434	3.016938473	2.811591248	2.47E-09	1.70E-08
91687	CENPL	6.717019739	+++	1.799736488	0.628734105	2.000283059	1.476251217	9.27E-12	8.42E-11
91653	BOC	4.830819483	+++	2.136900087	0.721539536	1.98948771	1.615975778	6.80E-07	3.25E-06
219287	AMER2	6.883903569	---	-4.806273208	-1.427317592	-2.438578952	2.89072325	2.91E-12	2.77E-11
25943	C20orf194	8.647762806	---	-1.556805728	-1.068365514	-1.553808558	1.392993267	0	0
50488	MINK1	8.841207733	---	-1.790214574	-0.574324644	-1.732031624	1.365523614	0	0
55970	GNG12	7.170352047	+++	2.631038897	0.337268039	2.411303448	1.793203462	3.74E-13	3.89E-12
1809	DPYSL3	6.881741024	+++	2.675380428	1.442687626	1.931521843	2.016529965	2.96E-12	2.81E-11
23114	NFASC	5.875390314	---	-3.075366704	-4.176029283	-1.45693228	2.902776089	2.11E-09	1.47E-08
100509894	CPB2-AS1	4.389287927	-?-	-2.799856044	NA	-1.411855321	2.105855683	5.69E-06	2.33E-05
222865	TMEM130	8.812647503	-?-	-6.468372727	NA	-5.017505043	5.742938885	0	0
50486	G0S2	3.731194665	+++	2.56382094	1.349247254	2.054219663	1.989095952	9.53E-05	0.000308991
51268	PIPOX	4.688840936	+++	2.85301242	1.442970264	2.282207029	2.192729904	1.37E-06	6.27E-06
57458	TMCC3	4.135329277	---	-3.354796176	-1.557233844	-0.706204207	1.872744742	1.77E-05	6.63E-05
3956	LGALS1	6.048209574	+++	2.381194579	1.30940113	2.505506541	2.065367417	7.32E-10	5.37E-09
55084	SOBP	5.917723163	---	-1.774750168	-0.629667296	-1.301902909	1.235440124	1.63E-09	1.15E-08
116984	ARAP2	4.766585156	---	-2.659605075	-1.053894463	-1.109829482	1.60777634	9.37E-07	4.38E-06
400793	C1orf226	7.237637578	+?+	2.447760771	NA	3.061038177	2.754399474	2.28E-13	2.43E-12
84457	PHYHIPL	4.707401261	---	-2.873386468	-1.70703325	-1.283884151	1.954767956	1.25E-06	5.77E-06
5621	PRNP	8.810689446	-?-	-2.129866073	NA	-1.859693957	1.994780015	0	0
23658	LSM5	6.113879751	+++	1.702391802	0.301729432	1.838910665	1.281010633	4.86E-10	3.66E-09
401207	C5orf63	4.222374365	+?+	2.296585904	NA	1.594572688	1.945579296	1.21E-05	4.67E-05
79674	VEPH1	4.017214323	+?+	5.54200428	NA	4.112305034	4.827154657	2.94E-05	0.000105371
375316	RBM44	1.980332491	+?+	2.398576627	NA	0.685462676	1.542019652	0.02383309	0.045000314
10771	ZMYND11	8.333459101	---	-1.521561895	-1.411672199	-1.226391978	1.386542024	0	0
8460	TPST1	5.470308403	+++	1.951655202	0.747863206	1.795934546	1.498484318	2.25E-08	1.34E-07
23259	DDHD2	9.528339558	---	-1.543498394	-0.99785424	-1.514820235	1.352057623	0	0
83706	FERMT3	4.889664386	+++	2.373733056	1.075416519	1.920866851	1.790005475	5.05E-07	2.46E-06
9319	TRIP13	6.100445692	+++	3.544330486	1.889169498	2.089630121	2.507710035	5.29E-10	3.95E-09
4601	MXI1	5.304345709	---	-2.342982323	-1.067726546	-0.929956393	1.44688842	5.65E-08	3.17E-07
85449	KIAA1755	-4.310693044	-+-	-2.638025764	0.39605855	-1.462181515	1.498755276	1.63E-05	6.13E-05
116372	LYPD1	5.617872988	+++	3.256732862	1.408709258	2.314416528	2.326619549	9.67E-09	6.10E-08
140290	TCP10L	4.186891582	---	-2.669843164	-0.493523102	-1.054783252	1.40604984	1.41E-05	5.39E-05
8398	PLA2G6	6.023067477	---	-1.651836387	-0.242434234	-1.479494781	1.124588467	8.56E-10	6.23E-09
54462	CCSER2	9.120433147	---	-1.784436367	-1.320539083	-1.481595588	1.528857013	0	0
55819	RNF130	3.600896	---	-1.897995986	-0.518315651	-0.604080551	1.006797396	0.000158561	0.000493802
2201	FBN2	4.625436713	+++	5.787487612	3.322392672	3.439562275	4.18314752	1.87E-06	8.35E-06
10014	HDAC5	7.335108979	---	-1.57684249	-0.462722675	-1.218397638	1.085987601	1.11E-13	1.22E-12
8828	NRP2	5.29282823	+++	2.622300845	1.947934451	1.609276181	2.059837159	6.02E-08	3.36E-07
55088	CCDC186	10.08519168	---	-1.618598974	-1.695332769	-1.668747326	1.660893023	0	0
81620	CDT1	5.562450461	+++	2.496567208	1.408018446	2.476180273	2.126921976	1.33E-08	8.19E-08
8476	CDC42BPA	6.763699396	---	-1.63178355	-0.575566089	-1.32985189	1.179067177	6.73E-12	6.19E-11
7869	SEMA3B	7.511411175	---	-3.2786009	-1.688723392	-2.145329347	2.370884546	2.92E-14	3.41E-13
649	BMP1	6.33516403	+++	2.270653127	1.15078444	2.41576126	1.945732942	1.19E-10	9.57E-10
54815	GATAD2A	5.775808643	+++	1.576712569	1.145600201	1.069802179	1.264038316	3.83E-09	2.57E-08
10350	ABCA9	2.176503193	---	-3.033625123	-2.546133901	-0.607426779	2.062395268	0.014758828	0.029413267
11173	ADAMTS7	4.721405253	+++	2.427173385	1.346367156	2.804677996	2.192739512	1.17E-06	5.41E-06
6491	STIL	6.355532131	+++	2.151409161	0.885409282	2.100953717	1.71259072	1.04E-10	8.43E-10
3163	HMOX2	6.111611972	---	-1.544791086	-0.508940689	-0.965593506	1.00644176	4.93E-10	3.70E-09
5104	SERPINA5	4.704704281	+++	4.891997794	0.999849842	3.664730638	3.185526091	1.27E-06	5.84E-06
80863	PRRT1	9.580416567	---	-2.960124989	-2.284486605	-3.499880305	2.914830633	0	0
253832	ZDHHC20	4.377705292	---	-2.814663541	-2.114416149	-0.635157184	1.854745625	6.00E-06	2.45E-05
113802	HENMT1	6.642720046	---	-2.928369705	-1.713536722	-2.092499846	2.244802091	1.54E-11	1.37E-10
51440	HPCAL4	9.313519293	---	-5.615488771	-3.148589212	-4.330782768	4.364953584	0	0
84466	MEGF10	3.85548584	---	-2.742718498	-2.653201864	-0.975186386	2.123702249	5.78E-05	0.000195326
214	ALCAM	4.628789931	---	-2.549663818	-1.519858492	-1.097637966	1.722386758	1.84E-06	8.22E-06
339804	C2orf74	4.748295496	-?-	-2.492892107	NA	-1.146756186	1.819824147	1.03E-06	4.77E-06
347733	TUBB2B	3.893550573	+++	2.642316668	0.976595683	1.013854963	1.544255771	4.94E-05	0.000169759
1875	E2F5	6.602240564	+++	1.891390371	1.112150032	1.695524592	1.566354998	2.02E-11	1.78E-10
10313	RTN3	9.551460719	---	-2.164656489	-2.933794181	-1.840530323	2.312993664	0	0
10260	DENND4A	5.115121924	---	-1.511907641	-0.950187371	-0.670951787	1.044348933	1.57E-07	8.23E-07
83849	SYT15	8.636246712	---	-2.427418142	-3.60501481	-2.488652881	2.840361944	0	0
6857	SYT1	10.31804433	---	-7.151992058	-6.024440357	-5.008649692	6.061694035	0	0
118427	OLFM3	10.03160344	---	-7.509643723	-5.611864411	-4.598439598	5.906649244	0	0
79690	GAL3ST4	7.043614038	+++	2.390278064	0.709764726	2.503514274	1.867852355	9.37E-13	9.38E-12
210	ALAD	4.940735337	---	-2.00738221	-0.569636879	-0.824735413	1.133918167	3.89E-07	1.92E-06
55852	TEX2	8.056470164	---	-1.565949452	-1.126951962	-1.258860585	1.317254	4.44E-16	6.17E-15
22904	SBNO2	3.980103004	+++	1.926836008	1.47118596	1.108214835	1.502078934	3.44E-05	0.000121827
8091	HMGA2	3.528842781	+?+	5.754337098	NA	5.393301632	5.573819365	0.000208691	0.000633543
3705	ITPK1	8.238062095	---	-1.726158794	-1.177458478	-1.715773862	1.539797045	1.11E-16	1.62E-15
653489	RGPD3	3.754199689	-??	-2.379366257	NA	NA	2.379366257	8.69E-05	0.000283961
25777	SUN2	8.53591877	---	-2.525786919	-0.686822268	-2.066542151	1.759717113	0	0
55765	INAVA	4.295356328	+++	3.021777614	1.396529815	2.183844828	2.200717419	8.72E-06	3.45E-05
28959	TMEM176B	4.562384998	+++	2.777930951	0.820313646	2.555630898	2.051291832	2.53E-06	1.10E-05
100500891	MIR3935	3.751151379	-??	-3.967531003	NA	NA	3.967531003	8.80E-05	0.00028718
3077	HFE	5.31145381	+++	2.404960367	1.107231341	2.146583024	1.886258244	5.44E-08	3.05E-07
5754	PTK7	7.016256802	+++	3.114541267	1.206240926	2.567836229	2.296206141	1.14E-12	1.13E-11
9246	UBE2L6	5.751209744	+++	1.751166483	0.82620425	1.487269181	1.354879971	4.43E-09	2.95E-08
23116	TOGARAM1	8.377513155	---	-1.559466095	-1.118358599	-1.372697353	1.350174016	0	0
290	ANPEP	4.434651034	+++	4.053673812	1.698030813	3.137930933	2.963211853	4.61E-06	1.92E-05
3958	LGALS3	5.06498085	+++	4.4987855	1.5668163	3.009565885	3.025055895	2.04E-07	1.05E-06
2911	GRM1	9.989915254	---	-5.319115097	-4.617340506	-4.35352069	4.763325431	0	0
23731	TMEM245	6.212069092	---	-1.470562615	-0.869180915	-0.902272663	1.080672064	2.61E-10	2.02E-09
3423	IDS	9.974094502	---	-2.948953354	-3.154253001	-2.655719471	2.919641942	0	0
399687	MYO18A	8.335168924	---	-1.810185618	-1.175893237	-1.792427097	1.592835317	0	0
25999	CLIP3	7.892737447	---	-2.653738024	-0.392819388	-1.689778622	1.578778678	1.44E-15	1.90E-14
23555	TSPAN15	7.394441848	---	-3.53887918	-1.918544675	-1.653069574	2.370164476	7.11E-14	7.96E-13
5091	PC	6.07607411	-?-	-1.814231641	NA	-1.344674183	1.579452912	6.16E-10	4.56E-09
27295	PDLIM3	4.68682269	+++	2.368494527	0.276215081	2.406305973	1.68367186	1.39E-06	6.33E-06
283450	HECTD4	9.286707426	---	-1.831490097	-0.957830988	-2.177811884	1.655710989	0	0
146956	EME1	6.402141207	+++	3.134657969	0.813836366	3.082576581	2.343690306	7.66E-11	6.28E-10
93429	LOC93429	5.495046219	-?-	-5.364337799	NA	-2.904761881	4.13454984	1.95E-08	1.18E-07
10535	RNASEH2A	7.224838949	+++	1.911130072	1.463341685	2.45802007	1.944163942	2.51E-13	2.66E-12
9289	ADGRG1	3.287088707	+++	1.965181523	0.949470988	0.986716691	1.300456401	0.000506145	0.001419173
121601	ANO4	8.962296345	---	-3.437732032	-4.420120295	-3.13070643	3.662852919	0	0
125061	AFMID	4.305173622	---	-2.602174178	-0.791093746	-0.97801461	1.457094178	8.34E-06	3.32E-05
11281	POU6F2	4.619114153	-?-	-4.525256102	NA	-2.485882615	3.505569358	1.93E-06	8.58E-06
6890	TAP1	5.461798182	+++	2.653432996	1.252514521	2.443168143	2.116371886	2.36E-08	1.40E-07
55013	MCUB	5.488762564	+++	2.425483048	1.192914664	2.177788022	1.932061911	2.02E-08	1.22E-07
9267	CYTH1	9.135797593	---	-2.348827606	-1.130819148	-1.83587318	1.771839978	0	0
115908	CTHRC1	3.934318174	+++	4.127309042	0.904551478	3.577119487	2.869660002	4.17E-05	0.000145365
100507347	VIM-AS1	4.755663471	+++	2.639415833	2.266205697	1.301046709	2.068889413	9.89E-07	4.61E-06
84970	C1orf94	5.245310855	+++	3.125876264	1.940337399	2.490470307	2.518894656	7.80E-08	4.28E-07
774	CACNA1B	9.877117139	---	-6.388583252	-4.542827168	-5.213187604	5.381532675	0	0
4057	LTF	5.362927095	+++	10.75119728	3.861278909	8.594624682	7.735700289	4.09E-08	2.33E-07
586	BCAT1	3.742298467	+++	3.198212404	1.649126252	1.278220707	2.041853121	9.12E-05	0.000296646
80830	APOL6	3.661495581	+++	2.458554391	0.793957385	1.535315676	1.595942484	0.000125374	0.000397269
23150	FRMD4B	5.209378118	---	-3.282063246	-1.238309266	-1.22490167	1.915091394	9.47E-08	5.14E-07
83463	MXD3	5.666694441	+++	2.337423443	1.187040504	2.401293009	1.975252319	7.28E-09	4.68E-08
25959	KANK2	5.764811172	+++	2.357285044	1.185814029	1.970681099	1.837926724	4.09E-09	2.73E-08
8835	SOCS2	3.594794902	+-+	4.379975889	-0.144259678	3.183907132	2.5693809	0.000324647	0.000947254
2554	GABRA1	8.790078643	-?-	-8.06191304	NA	-5.013568705	6.537740873	0	0
57553	MICAL3	6.762354617	---	-1.711704335	-0.578136392	-2.01083269	1.433557806	6.79E-12	6.24E-11
22982	DIP2C	7.612590552	---	-1.792063408	-0.899118567	-1.690521608	1.460567861	1.34E-14	1.63E-13
429	ASCL1	3.230739769	+-+	2.450012809	-0.153487284	2.449920393	1.684473495	0.001234703	0.003189504
83742	MARVELD1	5.846745922	+++	3.065323215	1.1175487	2.105819217	2.096230377	2.51E-09	1.73E-08
79652	TMEM204	4.722760154	+++	2.988330091	0.322819036	1.838226208	1.716458445	1.16E-06	5.38E-06
7517	XRCC3	3.233992234	+++	1.822403987	0.690353583	0.853350049	1.122035873	0.000610364	0.001680519
6746	SSR2	6.977525838	+++	1.49653631	0.840476569	1.993699518	1.443570799	1.50E-12	1.47E-11
197335	WDR90	2.837210132	+++	1.905897105	0.584142819	1.079260072	1.189766665	0.002275482	0.005541213
10910	SUGT1	5.338038623	---	-1.64547754	-0.664454918	-0.719444551	1.009792337	4.70E-08	2.66E-07
23109	DDN	8.789080622	-?-	-6.349917195	NA	-5.421375706	5.88564645	0	0
9064	MAP3K6	3.782739401	+++	3.330593715	1.086472768	1.208897483	1.875321322	7.76E-05	0.000255934
118611	C10orf90	7.713570617	---	-4.928550844	-2.736189966	-2.358467283	3.341069365	6.11E-15	7.63E-14
9420	CYP7B1	5.608614425	---	-4.112427246	-2.9562897	-1.866142096	2.978286348	1.02E-08	6.40E-08
1902	LPAR1	5.011078082	---	-4.346762471	-1.911027884	-1.377376663	2.545055673	2.71E-07	1.37E-06
9892	SNAP91	10.01570822	---	-5.766039397	-4.679904095	-4.424741288	4.956894927	0	0
56271	BEX4	7.926474682	---	-2.393554686	-1.341325195	-1.709510772	1.814796884	1.11E-15	1.48E-14
3993	LLGL2	3.66590045	-?-	-2.927334405	NA	-1.107799563	2.017566984	0.000123235	0.000391169
3008	HIST1H1E	3.017923352	+++	1.713466231	1.026465313	2.182726007	1.64088585	0.001272566	0.003273922
84798	C19orf48	5.592202013	+?+	1.872637492	NA	1.859979612	1.866308552	1.12E-08	6.99E-08
5159	PDGFRB	2.274342124	+-+	2.627179827	-0.005476063	1.286993465	1.306549785	0.022945424	0.043440712
1316	KLF6	4.315903875	+++	1.777955709	1.101584017	0.980031513	1.286523747	7.95E-06	3.17E-05
677763	SCARNA21	3.69566253	+??	2.080688136	NA	NA	2.080688136	0.000109657	0.000350929
107984660	LOC107984660	5.072726109	+?+	2.627321149	NA	2.394474135	2.510897642	1.96E-07	1.02E-06
54828	BCAS3	6.31391899	---	-1.59798505	-0.765761797	-0.857847285	1.073864711	1.36E-10	1.09E-09
8936	WASF1	7.9635213	---	-2.808019274	-1.443718172	-2.337703118	2.196480188	8.88E-16	1.20E-14
6853	SYN1	9.846752402	---	-6.212944326	-3.939385358	-4.395969724	4.849433136	0	0
6303	SAT1	3.48828165	+-+	1.787889735	-0.026778744	1.861942165	1.225536881	0.000486136	0.001367887
1028	CDKN1C	5.016660757	---	-3.458799628	-1.34724801	-1.667386833	2.15781149	2.63E-07	1.34E-06
154197	PNLDC1	8.056093783	-?-	-2.196580758	NA	-3.001924181	2.59925247	4.44E-16	6.17E-15
7091	TLE4	4.836471722	---	-2.424689053	-0.478973419	-1.058334472	1.320665648	6.61E-07	3.16E-06
79953	SYNDIG1	4.703672754	---	-1.684933504	-1.196316213	-1.442337681	1.441195799	1.28E-06	5.86E-06
6737	TRIM21	6.887173956	+++	2.26592189	0.74477528	2.319458268	1.776718479	2.85E-12	2.70E-11
84628	NTNG2	8.174625127	---	-2.214292882	-1.530440935	-2.600853195	2.115195671	1.11E-16	1.62E-15
140576	S100A16	6.282920956	+++	3.26550753	1.530827384	2.464248857	2.42019459	1.66E-10	1.32E-09
79990	PLEKHH3	4.937610442	+++	2.060949712	0.723835148	1.302716109	1.362500323	3.95E-07	1.95E-06
80741	LY6G5C	3.884304651	+++	2.382501073	0.202586813	1.151003846	1.245363911	5.13E-05	0.00017556
23597	ACOT9	3.937234285	+++	2.077146358	0.168536522	0.900854556	1.048845812	4.12E-05	0.00014372
219409	GSX1	4.347179317	+?+	4.449338083	NA	5.062674572	4.756006327	6.89E-06	2.78E-05
152002	XXYLT1	4.743743571	+++	1.70787944	1.04252112	0.865110691	1.205170417	1.05E-06	4.87E-06
221749	PXDC1	6.544829677	+++	2.792098068	0.904367687	1.886064295	1.86084335	2.98E-11	2.58E-10
10652	YKT6	4.62670843	+++	1.603106291	0.937166785	0.73142946	1.090567512	1.86E-06	8.30E-06
23710	GABARAPL1	10.12594791	---	-2.484141796	-2.077892435	-2.749018628	2.43701762	0	0
100507218	RNF157-AS1	3.540795882	+?+	2.971141433	NA	1.330759308	2.150950371	0.000199461	0.000607538
8542	APOL1	3.525887261	+++	3.990475861	0.981332079	2.011957606	2.327921848	0.000211033	0.000640125
610	HCN2	5.443559918	---	-2.842211125	-1.003812534	-2.148988862	1.998337507	2.61E-08	1.54E-07
118426	BORCS5	7.346933298	---	-1.61086002	-0.581256818	-1.183099024	1.125071954	1.01E-13	1.11E-12
127262	TPRG1L	9.969375175	---	-2.446370454	-1.796532756	-2.255471298	2.166124836	0	0
27148	STK36	5.577338504	+++	1.991333894	0.766174677	1.524631479	1.427380017	1.22E-08	7.56E-08
597	BCL2A1	3.312541798	+++	3.421349188	0.299397355	2.617553988	2.112766844	0.000462262	0.001306733
8338	HIST2H2AC	4.056017872	+?+	2.234246857	NA	2.787403361	2.510825109	2.50E-05	9.05E-05
317649	EIF4E3	8.47588711	---	-2.070111513	-1.625532279	-1.679085036	1.791576276	0	0
4982	TNFRSF11B	2.568860472	+++	3.375279039	0.020316121	2.175438923	1.857011361	0.005101677	0.011396171
27086	FOXP1	6.113225869	---	-1.708125068	-1.314620526	-1.357068651	1.459938082	4.88E-10	3.67E-09
5984	RFC4	6.587361421	+++	1.745036432	0.944518313	1.688165665	1.459240136	2.24E-11	1.96E-10
28986	MAGEH1	3.389656589	---	-1.66594222	-0.892124196	-0.882174794	1.14674707	0.000349901	0.001014796
10095	ARPC1B	4.651686062	+?+	2.119446743	NA	1.995097757	2.05727225	1.65E-06	7.42E-06
51114	ZDHHC9	2.853404719	---	-2.741363367	-0.337220679	-0.645776341	1.241453462	0.002162675	0.005298915
2018	EMX2	3.686329546	---	-3.405428901	-1.128066167	-1.45497804	1.996157703	0.000113756	0.000363095
23176	SEPTIN8	7.786485975	---	-1.968088516	-0.716110053	-1.470759444	1.384986004	3.44E-15	4.39E-14
5010	CLDN11	5.503622579	---	-5.579748745	-2.441915889	-2.323454419	3.448373017	1.86E-08	1.13E-07
284217	LAMA1	2.355201287	+++	2.512039282	1.069880769	1.285359703	1.622426585	0.009256337	0.019441493
26136	TES	4.990709582	+++	2.535987524	0.069109649	2.177173172	1.594090115	3.01E-07	1.52E-06
51537	MTFP1	4.280727727	+?+	3.236647618	NA	1.658619627	2.447633623	9.31E-06	3.67E-05
29993	PACSIN1	9.414833305	---	-7.826067772	-4.519642386	-5.321825747	5.889178635	0	0
84940	CORO6	10.23337887	---	-3.963203995	-4.201714843	-3.283504158	3.816140999	0	0
60592	SCOC	5.485553916	---	-1.716383756	-1.937842844	-0.885181433	1.513136011	2.06E-08	1.24E-07
55351	STK32B	3.419630007	+++	2.717688176	1.336435808	1.482069256	1.845397746	0.000313532	0.000917892
10444	ZER1	8.867809546	---	-1.82509601	-0.594837978	-1.81534933	1.411761106	0	0
54805	CNNM2	9.71182074	---	-1.9740829	-1.116150989	-1.971854939	1.687362943	0	0
60370	AVPI1	6.713153492	---	-2.203860035	-1.428071586	-1.563101654	1.731677758	9.52E-12	8.63E-11
9615	GDA	9.257923471	---	-7.73018832	-3.682399501	-5.014334942	5.475640921	0	0
10635	RAD51AP1	7.677033759	+++	2.144600886	1.205071971	3.426202302	2.258625053	8.10E-15	1.00E-13
101927768	HDAC2-AS2	5.196135096	-?-	-3.607521674	NA	-1.431288277	2.519404975	1.02E-07	5.50E-07
11096	ADAMTS5	4.031545026	+++	2.820380112	1.079068797	1.868174953	1.922541287	2.77E-05	9.96E-05
4501	MT1X	3.90311287	+++	3.083586297	1.680432282	1.712998555	2.159005711	4.75E-05	0.000163802
11335	CBX3	6.857750116	+++	1.577368795	0.623084229	1.663114121	1.287855715	3.50E-12	3.30E-11
196047	EMX2OS	7.760333462	---	-3.859974336	-1.954318515	-2.713506045	2.842599632	4.22E-15	5.35E-14
84458	LCOR	6.193058323	-?-	-1.926352148	NA	-1.294204133	1.610278141	2.95E-10	2.27E-09
26777	SNORA71A	2.660876605	++?	2.099695763	0.604161243	NA	1.351928503	0.003896876	0.008939288
55466	DNAJA4	9.439700236	---	-2.310227324	-1.265458764	-2.951741303	2.17580913	0	0
100289092	ATP2A1-AS1	4.8715992	+?+	2.52024157	NA	2.164533467	2.342387518	5.53E-07	2.68E-06
55346	TCP11L1	9.202425166	---	-1.497242618	-0.822385108	-1.544824461	1.288150729	0	0
26577	PCOLCE2	4.000339129	+++	4.102140236	2.225121232	2.125673023	2.81764483	3.16E-05	0.000112668
4086	SMAD1	4.505223759	+++	1.62470853	0.472346424	1.161828162	1.086294372	3.32E-06	1.42E-05
51227	PIGP	2.522415318	---	-1.755119909	-1.126509293	-0.337417318	1.073015506	0.0058276	0.012838491
729230	CCR2	3.536506365	+?+	3.318617963	NA	3.059653476	3.189135719	0.000202728	0.000616875
408	ARRB1	9.576644645	---	-2.656923776	-2.209716549	-2.726074238	2.530904854	0	0
9514	GAL3ST1	4.379232434	---	-3.49691249	-0.766010724	-2.059733326	2.10755218	5.95E-06	2.43E-05
284207	METRNL	3.237433539	+++	2.519586101	1.482599528	0.759619204	1.587268278	0.00060305	0.001663138
647946	MIR924HG	4.361406237	+?+	5.265216913	NA	3.417090781	4.341153847	6.46E-06	2.62E-05
1947	EFNB1	5.36982279	+++	2.056184224	0.997109395	1.645469836	1.566254485	3.94E-08	2.25E-07
8737	RIPK1	6.131061295	+++	1.562839617	0.696139673	1.224848651	1.16127598	4.36E-10	3.30E-09
4734	NEDD4	7.331264456	+++	1.786363106	0.769535583	2.09000511	1.5486346	1.14E-13	1.25E-12
23641	LDOC1	5.231087058	---	-3.166312856	-0.528021557	-1.62227118	1.772201864	8.43E-08	4.60E-07
130589	GALM	5.74128622	+++	2.171400856	0.908504811	1.804928229	1.628277965	4.70E-09	3.12E-08
80332	ADAM33	2.927107334	+++	4.267171448	1.251348456	1.663957964	2.394159289	0.001710654	0.00428014
23235	SIK2	7.171191905	---	-1.510934241	-0.490655686	-1.07803432	1.026541416	3.72E-13	3.87E-12
535	ATP6V0A1	9.215998022	---	-1.913501238	-1.02150236	-2.166703946	1.700569181	0	0
84166	NLRC5	5.083032334	+++	2.743498188	1.301799717	1.773543407	1.939613771	1.86E-07	9.67E-07
84552	PARD6G	3.765115245	+++	2.227962981	0.476055789	1.037246257	1.247088342	8.32E-05	0.00027286
285671	RNF180	3.322804998	+++	2.070407622	0.63799705	1.455599195	1.388001289	0.000445586	0.001263689
388419	BTBD17	3.024736649	+++	4.007923592	1.023164198	1.99425829	2.341782027	0.001244249	0.00321054
81931	ZNF93	6.081722732	+++	1.763564926	0.658982415	2.103763449	1.508770263	5.94E-10	4.41E-09
9697	TRAM2	4.331355159	+++	2.2661381	0.532841493	1.712653714	1.503877769	7.41E-06	2.98E-05
10087	COL4A3BP	7.96049943	---	-1.481673422	-1.052130815	-1.099623245	1.211142494	8.88E-16	1.20E-14
10434	LYPLA1	5.607243082	+++	1.735304341	0.07441751	2.367084592	1.392268814	1.03E-08	6.45E-08
3131	HLF	9.872980919	---	-4.095999852	-3.291779026	-3.577073779	3.654950886	0	0
11322	TMC6	5.109003701	---	-2.810771825	-0.891908614	-1.287524072	1.663401503	1.62E-07	8.49E-07
101928243	DARS-AS1	5.724789381	+?+	2.309415608	NA	2.217203261	2.263309435	5.18E-09	3.41E-08
56132	PCDHB3	3.037509983	+++	2.432743912	1.605869441	1.359635916	1.799416423	0.001192708	0.003092799
11169	WDHD1	4.703171433	+++	1.589223055	1.228101329	1.378212235	1.398512207	1.28E-06	5.87E-06
2346	FOLH1	6.314203866	---	-4.574174686	-2.525906765	-2.103388426	3.067823292	1.36E-10	1.09E-09
6416	MAP2K4	9.645450273	---	-1.993912708	-1.76148043	-1.990633872	1.915342337	0	0
6662	SOX9	4.250521419	+++	1.921337131	1.454729288	1.171962424	1.516009614	1.07E-05	4.16E-05
64834	ELOVL1	4.362042505	---	-3.033213271	-1.223679008	-0.841589499	1.699493926	6.44E-06	2.62E-05
85462	FHDC1	4.917919503	+++	3.016884421	1.594980017	1.922666775	2.178177071	4.37E-07	2.15E-06
90355	C5orf30	9.328172413	---	-2.491995611	-1.780457445	-1.964047376	2.078833477	0	0
90271	OLMALINC	6.51619864	---	-2.798906736	-1.755377019	-1.107091244	1.887125	3.61E-11	3.09E-10
54677	CROT	5.14250325	+++	1.720190018	0.465120782	1.821841778	1.335717526	1.36E-07	7.20E-07
5801	PTPRR	8.76307381	-?-	-5.968030195	NA	-4.300852513	5.134441354	0	0
79971	WLS	5.436188961	+++	2.113391407	0.730001917	1.515472676	1.452955333	2.72E-08	1.60E-07
25861	WHRN	4.904319871	---	-2.728358522	-0.349111917	-1.442454186	1.506641542	4.69E-07	2.30E-06
2004	ELK3	6.617830665	+++	2.091834833	1.105339867	2.080985085	1.759386595	1.82E-11	1.61E-10
400761	LRRC8C-DT	5.116603301	---	-2.870529547	-1.246486227	-1.134611145	1.750542306	1.56E-07	8.18E-07
81671	VMP1	3.932075484	+++	2.195081487	0.392932739	1.135062304	1.24102551	4.21E-05	0.000146589
1371	CPOX	8.034402205	---	-2.220561485	-1.268561847	-1.147164993	1.545429442	4.44E-16	6.17E-15
440689	HIST2H2BF	2.142609491	+?+	2.251306951	NA	0.961015403	1.606161177	0.016072234	0.031737711
320	APBA1	9.758282441	---	-2.421208579	-1.929840609	-2.964212985	2.438420725	0	0
6382	SDC1	3.990034922	+++	4.423771796	1.462975918	2.732605166	2.873117627	3.30E-05	0.000117244
83692	CD99L2	9.599901646	---	-1.584274376	-1.160982552	-1.359530036	1.368262321	0	0
342184	FMN1	7.137699371	---	-3.000902193	-2.582277995	-2.057874197	2.547018128	4.75E-13	4.89E-12
10384	BTN3A3	5.723725614	+++	2.373671552	0.468400847	2.122011075	1.654694491	5.21E-09	3.43E-08
387357	THEMIS	8.7602706	-?-	-3.613718076	NA	-3.374927278	3.494322677	0	0
84188	FAR1	5.955141598	---	-2.446869175	-1.08526465	-0.756130796	1.42942154	1.30E-09	9.22E-09
22856	CHSY1	4.165935182	+++	1.552701304	1.11240265	1.109615328	1.258239761	1.55E-05	5.87E-05
6768	ST14	6.077408088	+++	4.423975612	1.295536643	3.737537272	3.152349842	6.11E-10	4.53E-09
64386	MMP25	4.686715187	+++	4.433175236	0.412656185	2.852475031	2.566102151	1.39E-06	6.33E-06
7581	ZNF33A	6.316860032	---	-1.737222205	-0.781663532	-1.105230142	1.208038626	1.33E-10	1.07E-09
9108	MTMR7	9.762021437	---	-5.048659748	-5.300565448	-3.340137583	4.563120927	0	0
118663	BTBD16	8.371083329	-?-	-3.610933921	NA	-2.751005175	3.180969548	0	0
51316	PLAC8	3.142062898	+-+	2.816229352	-1.84661721	3.516165414	2.726337326	0.00167762	0.004210141
4756	NEO1	3.959130937	---	-2.203902303	-0.944981962	-0.74325626	1.297380175	3.76E-05	0.000132218
122769	LRR1	7.437389822	+++	2.430035048	0.682562876	2.712017596	1.941538507	5.13E-14	5.85E-13
10051	SMC4	6.876223211	+++	2.206698672	1.212196291	2.47515197	1.964682311	3.07E-12	2.91E-11
84162	KIAA1109	9.186900369	---	-1.503108907	-0.758230851	-1.96097546	1.407438406	0	0
348938	NIPAL4	6.58555649	---	-5.147237306	-1.526127678	-2.501242656	3.058202547	2.27E-11	1.98E-10
205428	DIPK2A	4.320955288	---	-2.200042555	-0.267607411	-0.946290011	1.137979992	7.77E-06	3.11E-05
80063	ATF7IP2	5.396506929	---	-2.53923745	-1.942705049	-1.508689353	1.996877284	3.40E-08	1.97E-07
11118	BTN3A2	7.029097508	+++	2.774974227	0.972176622	2.956124191	2.234425013	1.04E-12	1.04E-11
386617	KCTD8	6.261977639	-?-	-4.819232411	NA	-2.549492382	3.684362397	1.90E-10	1.50E-09
84938	ATG4C	3.730940057	---	-2.553399657	-1.864797873	-0.4398012	1.61933291	9.54E-05	0.000309249
55635	DEPDC1	6.779030286	+++	2.505876308	1.114041586	3.92185632	2.513924738	6.05E-12	5.59E-11
2209	FCGR1A	3.739395156	+++	2.5367772	0.079420394	2.381949051	1.666048881	9.22E-05	0.00029988
549	AUH	7.718886185	---	-1.505254977	-0.853952248	-1.142686927	1.167298051	5.88E-15	7.37E-14
728	C5AR1	4.262575089	+?+	2.693202984	NA	2.647161069	2.670182027	1.01E-05	3.96E-05
5163	PDK1	3.379180354	+++	1.80048278	1.220922072	0.944267868	1.321890907	0.000363511	0.001051273
57469	PNMA8B	9.530097386	---	-3.744701712	-2.282487566	-3.95953248	3.328907253	0	0
4521	NUDT1	5.970201153	+?+	1.948009697	NA	1.695455713	1.821732705	1.18E-09	8.46E-09
55616	ASAP3	4.627956647	+++	2.083273123	1.208094646	1.111686433	1.467684734	1.85E-06	8.25E-06
26049	FAM169A	7.325998277	---	-1.601470293	-1.234489421	-1.757388774	1.531116163	1.19E-13	1.29E-12
5034	P4HB	6.048960333	+++	1.523227119	1.262611014	1.49043588	1.425424671	7.29E-10	5.35E-09
401134	LINC02232	2.63060888	-?-	-3.228834623	NA	-1.179619867	2.204227245	0.004261603	0.00968979
1946	EFNA5	4.371418115	---	-4.446016294	-1.225219434	-1.777009854	2.482748527	6.17E-06	2.51E-05
287	ANK2	10.07909547	---	-2.0616692	-4.307552043	-2.109732706	2.826317983	0	0
56956	LHX9	4.510184072	+++	6.874389928	0.454355819	5.45802436	4.262256702	3.24E-06	1.39E-05
57468	SLC12A5	8.753675532	-?-	-6.898099507	NA	-5.076622158	5.987360833	0	0
677807	SNORA22	3.531520818	+??	2.296614583	NA	NA	2.296614583	0.000206589	0.000627787
151636	DTX3L	5.41341492	+++	2.209424131	0.450427149	2.118025859	1.592625713	3.09E-08	1.80E-07
6614	SIGLEC1	2.887751235	+-+	3.057217679	-0.204058677	2.671585207	1.977620521	0.003880066	0.008907422
4684	NCAM1	-4.1679179	-+-	-1.516978365	0.67765895	-1.423338036	1.205991784	3.07E-05	0.000109681
534	ATP6V1G2	8.751922224	-?-	-3.263793517	NA	-3.038564192	3.151178855	0	0
6556	SLC11A1	4.78343298	+++	2.945402096	0.746780741	2.985161476	2.225781438	8.62E-07	4.05E-06
7205	TRIP6	6.405347203	+++	2.220620228	1.092916541	2.160645966	1.824727578	7.50E-11	6.16E-10
3417	IDH1	7.265697137	+++	1.903632719	0.43150926	2.560615265	1.631919081	1.86E-13	1.99E-12
3315	HSPB1	5.974311175	+++	2.252447215	1.356931946	1.979654765	1.863011309	1.16E-09	8.27E-09
65975	STK33	4.17422916	+-+	1.866361939	-0.002830385	2.237658976	1.368950433	2.99E-05	0.000106872
4053	LTBP2	3.215393649	+++	3.530261243	1.060626004	1.876779671	2.155888973	0.000651329	0.001781743
6616	SNAP25	10.37160628	---	-5.574096844	-5.860460171	-4.445287749	5.293281588	0	0
132884	EVC2	5.13600997	+++	2.986150986	1.595462192	2.592264434	2.391292537	1.40E-07	7.44E-07
79602	ADIPOR2	6.161632696	---	-2.529150301	-1.545527081	-0.919513622	1.664730335	3.60E-10	2.74E-09
105369201	LOC105369201	6.305863003	-?-	-4.017548725	NA	-2.606254005	3.311901365	1.43E-10	1.14E-09
54587	MXRA8	3.573795574	+++	3.1944952	1.240295128	1.550172183	1.994987503	0.000175922	0.000542334
7008	TEF	9.643920826	---	-1.924249052	-2.043608679	-2.924166259	2.29734133	0	0
4248	MGAT3	8.786115957	---	-1.928632236	-1.189323775	-2.890223646	2.002726552	0	0
4776	NFATC4	2.423748855	+?+	2.28073805	NA	0.974281219	1.627509634	0.007680612	0.016443956
780851	SNORD3A	3.513577233	-??	-3.894840182	NA	NA	3.894840182	0.000221058	0.000667328
10293	TRAIP	5.451623093	+++	2.745420261	1.216092233	1.792547783	1.918020092	2.50E-08	1.47E-07
122060	SLAIN1	3.761437944	---	-2.980665532	-1.197380792	-0.937850414	1.705298913	8.45E-05	0.000276459
4124	MAN2A1	3.542829527	---	-3.031358503	-2.563978618	-0.526672031	2.040669717	0.000197929	0.000603174
153364	MBLAC2	8.575859199	---	-1.465114094	-0.586533698	-1.755266513	1.268971435	0	0
6695	SPOCK1	7.400863763	---	-4.102894103	-2.523115031	-2.692659756	3.106222963	6.76E-14	7.60E-13
28511	NKIRAS2	6.975582676	+?+	1.532742138	NA	1.515980814	1.524361476	1.52E-12	1.49E-11
80262	C16orf70	9.084400868	---	-1.56239328	-0.648159068	-1.315892208	1.175481518	0	0
55282	LRRC36	4.288250817	+?+	3.439986595	NA	2.520137647	2.980062121	9.00E-06	3.56E-05
54764	ZRANB1	8.492556272	---	-1.456425778	-1.022483808	-1.565677936	1.34819584	0	0
57209	ZNF248	8.294582387	---	-1.750403629	-1.289851482	-1.630414037	1.556889716	0	0
1075	CTSC	4.611089365	+++	1.875977696	0.392549877	2.781269588	1.68326572	2.00E-06	8.89E-06
2207	FCER1G	5.434525086	+++	2.357702181	0.614058487	3.064002019	2.011920896	2.75E-08	1.61E-07
55102	ATG2B	8.639746677	---	-1.386047462	-0.981359087	-1.470826436	1.279410995	0	0
25924	MYRIP	9.728873005	---	-3.347275024	-2.351824225	-2.874120408	2.857739885	0	0
10606	PAICS	5.550643049	+++	2.00064947	1.059454141	1.495681672	1.518595095	1.42E-08	8.73E-08
64410	KLHL25	3.217067543	+++	1.813050186	1.429735483	0.69006836	1.310951343	0.000647541	0.001772751
2175	FANCA	3.068805047	+-+	2.760697001	-0.101018933	1.263945301	1.375220412	0.002149168	0.005267935
122481	AK7	1.959627576	-?-	-3.27062814	NA	-1.109120032	2.189874086	0.025019668	0.046925993
103344931	LOC103344931	8.744811608	-?-	-1.863256871	NA	-2.292484085	2.077870478	0	0
8662	EIF3B	4.556717068	+++	1.472552279	1.14664177	0.72987087	1.116354973	2.60E-06	1.13E-05
23048	FNBP1	5.854090192	---	-2.403680601	-0.536192187	-1.175267725	1.371713505	2.40E-09	1.66E-08
9179	AP4M1	5.652774802	+++	1.507519443	0.587341997	1.159078385	1.084646608	7.89E-09	5.04E-08
4615	MYD88	8.254375417	+++	2.23337188	0.793705525	2.33591767	1.787665025	1.11E-16	1.62E-15
92092	ZC3HAV1L	3.227033902	+++	3.04866787	1.486134793	1.064718313	1.866506992	0.000625403	0.001718826
338761	C1QL4	2.590646909	+?+	4.881380172	NA	2.084306028	3.4828431	0.004789786	0.010772118
355	FAS	4.41662925	+++	2.33552347	0.772398181	2.152826015	1.753582555	5.01E-06	2.08E-05
554279	LINC00862	3.475288852	-??	-3.622448047	NA	NA	3.622448047	0.000255152	0.000760349
25791	NGEF	9.123415422	---	-5.176153524	-2.422726951	-3.778664629	3.792515035	0	0
729956	SHISA7	5.28390396	---	-4.570831686	-2.112585087	-2.552696453	3.078704408	6.32E-08	3.51E-07
3356	HTR2A	10.28712558	---	-5.423128695	-5.567473184	-4.587361661	5.192654513	0	0
4173	MCM4	4.490683212	+++	1.734865496	0.806125238	1.187214478	1.242735071	3.55E-06	1.51E-05
2902	GRIN1	8.740241507	-?-	-8.094982396	NA	-5.651801405	6.873391901	0	0
114614	MIR155HG	4.631112116	+?+	3.296165504	NA	2.815446162	3.055805833	1.82E-06	8.14E-06
197021	LCTL	4.559129416	+++	3.56347824	0.792690038	2.266807183	2.207658487	2.57E-06	1.12E-05
91404	SESTD1	5.748092942	---	-1.721077696	-1.358987295	-0.846619353	1.308894781	4.51E-09	3.00E-08
2587	GALR1	2.588435883	+++	3.881816116	1.002925403	1.696609451	2.193783656	0.004820645	0.010831198
6311	ATXN2	5.58149076	---	-1.516792142	-1.012282759	-0.649985777	1.059686893	1.19E-08	7.40E-08
26586	CKAP2	5.237838998	+++	2.302521848	0.722138677	1.645199325	1.55661995	8.12E-08	4.45E-07
121506	ERP27	4.586938495	+?+	2.855190156	NA	3.53336263	3.194276393	2.25E-06	9.87E-06
100996291	LINC01993	5.014662533	+?+	6.554783063	NA	5.253319483	5.904051273	2.66E-07	1.35E-06
113189	CHST14	9.137231013	+++	2.324328146	1.810550552	2.432896637	2.189258445	0	0
2115	ETV1	5.461456077	+++	3.071407878	0.689426088	2.371990348	2.044274771	2.36E-08	1.40E-07
10130	PDIA6	6.870016658	+++	1.445401365	1.357320179	1.492638168	1.431786571	3.21E-12	3.04E-11
400955	LINC01122	5.728416694	-?-	-3.278320553	NA	-2.270941327	2.77463094	5.07E-09	3.34E-08
81551	STMN4	7.185432677	---	-3.197441375	-2.123400242	-2.706073021	2.675638213	3.35E-13	3.50E-12
90952	ESAM	4.111773417	+++	2.438903634	0.155788872	1.587438606	1.394043704	1.96E-05	7.27E-05
386597	RNF144A-AS1	8.737659326	-?-	-4.305957218	NA	-3.793731991	4.049844605	0	0
9620	CELSR1	5.264618992	+++	3.988739615	2.317417396	3.636021738	3.314059583	7.02E-08	3.88E-07
541565	C8orf58	5.710814905	+++	1.985212806	1.259021793	1.074061724	1.439432108	5.62E-09	3.68E-08
1040	CDS1	8.521194188	---	-4.538927308	-3.599461772	-2.657558646	3.598649242	0	0
57515	SERINC1	9.138617167	---	-1.634487366	-1.33179631	-1.527087279	1.497790318	0	0
220972	Mar-08	3.061870249	---	-1.929096016	-0.593151882	-0.608707505	1.043651801	0.001099794	0.002874657
83699	SH3BGRL2	9.951101772	---	-2.503697174	-2.45003312	-2.514631837	2.489454043	0	0
599	BCL2L2	9.274699576	---	-1.657576862	-1.470905466	-2.540896497	1.889792941	0	0
339488	TFAP2E	3.619180973	---	-2.157229947	-0.313688875	-1.278805111	1.249907978	0.000147768	0.000462708
4674	NAP1L2	8.736454712	---	-4.475034225	-1.081083877	-3.67638977	3.077502624	0	0
639	PRDM1	3.842203331	+++	2.378801302	0.441074821	1.413831701	1.411235941	6.10E-05	0.000204884
2357	FPR1	3.720915309	+++	3.0659032	0.639283935	2.441122605	2.048769913	9.93E-05	0.000320543
653820	FAM72B	5.847789071	+++	2.365272159	0.884468078	2.276653553	1.842131263	2.49E-09	1.72E-08
10451	VAV3	2.992940673	+++	2.724657293	0.803892153	1.244835	1.591128148	0.001381517	0.003531894
547	KIF1A	9.434237445	---	-2.205328986	-2.474427643	-3.1554164	2.611724343	0	0
63939	FAM217B	8.44559825	---	-1.694135222	-1.535911065	-1.321511898	1.517186062	0	0
5420	PODXL	2.841404546	+++	2.206544167	0.750488514	0.776583993	1.244538891	0.002245765	0.00547394
9649	RALGPS1	6.446169907	---	-1.597023016	-1.170917598	-1.561163326	1.443034647	5.74E-11	4.79E-10
443	ASPA	9.22885289	---	-4.962351213	-2.963970683	-3.281983905	3.736101934	0	0
6769	STAC	4.180979286	+++	4.78959223	1.796331745	3.378688998	3.321537658	1.45E-05	5.53E-05
56034	PDGFC	5.618516706	+++	2.452731001	1.259479744	1.888486713	1.866899153	9.63E-09	6.08E-08
317772	HIST2H2AB	4.701194308	++?	2.104518318	1.493695329	NA	1.799106824	1.29E-06	5.93E-06
9463	PICK1	7.023713604	---	-2.013408763	-1.062769759	-1.374955033	1.483711185	1.08E-12	1.08E-11
57692	MAGEE1	9.32532051	---	-3.797537126	-2.444335124	-3.581416258	3.274429503	0	0
63027	SLC22A23	3.543586654	---	-1.943953095	-0.196441098	-0.989136589	1.043176927	0.000197362	0.000601645
55619	DOCK10	4.262322365	---	-2.772633116	-0.708654874	-1.109085702	1.530124564	1.01E-05	3.96E-05
54756	IL17RD	4.379750001	+++	1.836989107	0.808666621	1.522769945	1.389475225	5.94E-06	2.43E-05
120425	JAML	3.116252658	+?+	3.840031707	NA	2.053674661	2.946853184	0.000915826	0.002428458
7039	TGFA	3.024855088	---	-3.554285652	-1.028229732	-1.35693896	1.979818114	0.001243761	0.003209735
5128	CDK17	9.148833505	---	-1.594878139	-0.839296676	-1.491941857	1.308705557	0	0
5864	RAB3A	9.832877199	---	-4.757448479	-3.21553276	-4.197490679	4.056823973	0	0
122402	TDRD9	6.308793805	---	-2.557205346	-1.55264416	-2.337155249	2.149001585	1.41E-10	1.12E-09
6855	SYP	9.788801776	---	-4.184407034	-3.081279876	-4.070167709	3.778618206	0	0
3792	KEL	6.823350836	---	-3.789738052	-2.685794978	-1.985495806	2.820342946	4.45E-12	4.16E-11
3911	LAMA5	3.555609077	+++	2.793052715	0.891153664	1.271626527	1.651944302	0.000188552	0.000576902
3654	IRAK1	6.266571441	+++	2.113789395	1.572454632	1.130207882	1.60548397	1.85E-10	1.46E-09
9507	ADAMTS4	5.327833853	---	-2.984857749	-1.560966695	-1.720545837	2.088790094	4.97E-08	2.80E-07
113130	CDCA5	5.61708742	+++	3.178492198	1.476015124	2.158167436	2.270891586	9.71E-09	6.12E-08
23643	LY96	4.123700827	+-+	2.890046352	-0.283265583	2.96946585	2.047592595	3.73E-05	0.000131229
101928865	LOC101928865	3.41893192	+??	2.189347708	NA	NA	2.189347708	0.000314337	0.000919516
2176	FANCC	6.449879652	+++	1.919844473	1.027400178	2.013087463	1.653444038	5.60E-11	4.69E-10
10981	RAB32	5.118499186	+++	2.186949649	0.442452244	2.720107979	1.783169958	1.54E-07	8.10E-07
2120	ETV6	6.092553441	+++	1.560592837	0.681955849	1.437758261	1.226768982	5.56E-10	4.13E-09
3759	KCNJ2	5.331794271	---	-2.961871653	-1.850710868	-1.05392954	1.95550402	4.86E-08	2.75E-07
9741	LAPTM4A	5.223330387	+++	1.561873001	0.122896559	1.647859414	1.110876325	8.79E-08	4.79E-07
55799	CACNA2D3	9.625716794	---	-4.779180559	-3.068871242	-3.724307041	3.857452948	0	0
146779	EFCAB3	3.41376112	+??	2.950617951	NA	NA	2.950617951	0.000320364	0.00093565
581	BAX	6.269229946	+++	1.733601434	1.159612639	1.504912321	1.466042131	1.81E-10	1.43E-09
644596	SMIM10L2B	9.476051792	---	-4.057311864	-2.510787901	-4.109928904	3.55934289	0	0
79191	IRX3	4.647718526	+?+	4.016560614	NA	4.760293207	4.388426911	1.68E-06	7.56E-06
59345	GNB4	4.468716603	+++	1.61066388	0.120765649	1.41859397	1.050007833	3.93E-06	1.66E-05
10826	FAXDC2	6.10358184	---	-3.259701929	-1.343621813	-1.241911438	1.948411727	5.19E-10	3.88E-09
9077	DIRAS3	3.290071545	+++	2.455100432	0.972847617	1.851411918	1.759786656	0.00050081	0.001406152
4004	LMO1	3.17380679	+++	4.42268226	1.580076564	2.000021089	2.667593304	0.000752269	0.002032425
132720	FAM241A	3.221300028	-?-	-2.764357175	NA	-0.899828395	1.832092785	0.000638052	0.001750439
83690	CRISPLD1	6.815230182	+++	2.818098628	1.184352121	3.471192403	2.491214384	4.71E-12	4.40E-11
1657	DMXL1	7.96177334	---	-1.444018481	-1.007393599	-1.157246012	1.202886031	8.88E-16	1.20E-14
162073	ITPRIPL2	2.881449047	+++	1.830670394	1.413288131	0.566876144	1.270278223	0.001979256	0.004892048
51136	RNFT1	6.246777458	+?+	1.601983396	NA	1.656709346	1.629346371	2.10E-10	1.64E-09
55515	ASIC4	3.732531981	+++	3.419452148	3.17648133	1.574968628	2.723634035	9.48E-05	0.000307463
147015	DHRS13	4.2069788	+++	1.956517436	0.953386252	1.467429225	1.459110971	1.29E-05	4.97E-05
342892	ZNF850	4.618991556	+++	1.938819585	1.182332376	1.288758651	1.469970204	1.93E-06	8.58E-06
56128	PCDHB8	3.308854957	+++	2.930944108	1.044544695	1.839894389	1.938461064	0.000468392	0.001322225
78986	DUSP26	6.937323833	---	-2.554554537	-1.736259944	-2.582241528	2.29101867	2.00E-12	1.93E-11
79805	VASH2	2.339927519	+?+	3.497760718	NA	1.439008145	2.468384431	0.009643741	0.020183422
55614	KIF16B	2.980868598	---	-1.703010374	-0.94086523	-0.519214872	1.054363492	0.00143716	0.003659477
201562	HACD2	3.215936561	---	-1.682719225	-0.828165634	-0.505451205	1.005445354	0.000650098	0.001778954
8794	TNFRSF10C	4.224056458	+-+	2.691541654	-0.046655626	3.103501361	1.94723288	2.40E-05	8.73E-05
51054	PLEKHA8P1	5.438634682	+?+	2.139162712	NA	1.556461779	1.847812245	2.68E-08	1.58E-07
10561	IFI44	3.974256488	+-+	2.436383965	-0.254358681	1.945310584	1.545351076	7.06E-05	0.000234542
63922	CHTF18	2.687945944	+++	1.796370104	1.273473461	0.795790318	1.288544628	0.003594652	0.008328406
54521	WDR44	4.842121269	---	-1.435258148	-1.129022133	-0.613272645	1.059184309	6.42E-07	3.08E-06
118987	PDZD8	6.80112229	---	-1.534086865	-0.742250851	-1.281481935	1.185939884	5.19E-12	4.83E-11
1540	CYLD	7.377590586	---	-1.52617254	-0.887135702	-1.331433888	1.248247377	8.06E-14	8.98E-13
3182	HNRNPAB	6.124752971	+++	1.503871002	1.235615326	1.147351454	1.295612594	4.54E-10	3.42E-09
338811	TAFA2	10.09780267	---	-4.017691915	-5.208903916	-4.201015042	4.475870291	0	0
140545	RNF32	2.792873358	---	-3.703511305	-1.146157829	-0.792311037	1.880660057	0.002612107	0.006273373
91179	SCARF2	3.797563858	+?+	2.682893901	NA	1.703816825	2.193355363	7.31E-05	0.000241847
6812	STXBP1	10.02851763	---	-3.932281725	-2.720254765	-3.821417572	3.49131802	0	0
730101	LOC730101	4.602050935	+++	2.23280725	1.238431383	1.331218767	1.600819133	2.09E-06	9.24E-06
23285	KIAA1107	8.139256472	---	-3.066428805	-2.434318981	-1.917224675	2.472657487	2.22E-16	3.17E-15
83483	PLVAP	5.623269066	+++	2.853905557	1.609639794	2.845509729	2.436351693	9.37E-09	5.93E-08
157807	CLVS1	4.090078159	---	-3.512459982	-1.619429371	-1.978041235	2.369976863	2.16E-05	7.92E-05
857	CAV1	4.280210738	+?+	3.362290924	NA	2.980529464	3.171410194	9.34E-06	3.68E-05
727758	ROCK1P1	3.74904037	---	-2.5963658	-1.784245157	-0.919358112	1.766656356	8.88E-05	0.000289247
268	AMH	2.830033631	+-+	3.877430864	-0.707556119	2.222677306	2.26922143	0.004654311	0.010499287
10351	ABCA8	5.070511392	---	-4.252768362	-1.717407016	-1.609718617	2.526631331	1.98E-07	1.03E-06
56892	TCIM	4.322210025	+++	2.193125261	1.503210542	2.363677907	2.02000457	7.72E-06	3.09E-05
54058	C21orf58	3.519579535	+++	2.188174536	0.721633631	1.472712685	1.460840284	0.000216116	0.000654133
7078	TIMP3	3.370468455	+++	2.204687618	0.994815432	1.179984806	1.459829285	0.000375202	0.001081667
51322	WAC	7.0425298	---	-1.378834806	-1.1895929	-0.940630544	1.169686083	9.44E-13	9.45E-12
2139	EYA2	3.576837484	+++	2.50302047	0.949234033	1.640248278	1.697500927	0.000173888	0.000536878
55331	ACER3	2.519925186	---	-2.249025253	-1.070835505	-0.32402708	1.214629279	0.005868989	0.012922642
9515	STXBP5L	9.642412305	---	-4.397695227	-2.885842195	-3.635800605	3.639779342	0	0
8364	HIST1H4C	2.733594196	+++	1.803717566	0.23905942	3.2922079	1.778328295	0.00313236	0.007364464
9034	CCRL2	3.987006208	+++	2.472026795	0.162083804	2.088440484	1.574183694	3.35E-05	0.000118658
6623	SNCG	10.00876545	---	-4.831715529	-4.215918374	-4.297952188	4.448528697	0	0
837	CASP4	6.285870893	+++	2.760875144	0.659428062	3.065578121	2.161960442	1.63E-10	1.29E-09
54507	ADAMTSL4	3.599913388	+++	2.73052215	0.827248478	1.665759849	1.741176825	0.000159162	0.000495503
150763	GPAT2	4.621467735	---	-2.970879574	-1.422220414	-1.391192422	1.92809747	1.91E-06	8.49E-06
1842	ECM2	4.800734208	+-+	2.370553534	-0.464883732	2.749084127	1.861507131	1.58E-06	7.15E-06
388011	LINC01550	5.248066657	+?+	2.187283655	NA	2.239512459	2.213398057	7.69E-08	4.23E-07
7188	TRAF5	2.784138565	+++	2.201482707	0.259028487	0.822963689	1.094491627	0.002683505	0.006421269
388662	SLC6A17	8.720037534	-?-	-6.491698258	NA	-5.117037609	5.804367934	0	0
84669	USP32	6.735717442	---	-1.424696284	-0.400439231	-1.288425461	1.037853658	8.16E-12	7.45E-11
57213	SPRYD7	9.157151595	---	-1.562781559	-0.927798675	-1.452131829	1.314237354	0	0
729234	FAHD2CP	3.410832686	---	-2.325515478	-1.350332123	-0.787993342	1.487946981	0.000323824	0.000945154
10166	SLC25A15	2.334047252	+++	2.107149915	0.368159082	0.613557085	1.029622028	0.009796624	0.020468306
23165	NUP205	7.630485903	+++	1.559254659	0.630842487	1.676000239	1.288699128	1.17E-14	1.42E-13
51310	SLC22A17	6.845854231	---	-1.753603361	-0.738126754	-1.633307205	1.37501244	3.80E-12	3.58E-11
9478	CABP1	9.696230775	---	-4.991574734	-4.92883678	-4.182121267	4.700844261	0	0
284434	NWD1	2.706231911	---	-2.982153566	-1.291495503	-1.009828885	1.761159318	0.003402575	0.007924487
55701	ARHGEF40	4.684796528	+++	1.801797054	1.056798752	1.008315402	1.288970403	1.40E-06	6.38E-06
79660	PPP1R3B	6.082667903	+++	2.541249779	1.690734113	2.579559237	2.270514376	5.91E-10	4.39E-09
389084	SNORC	2.871163293	-?-	-2.570910273	NA	-1.423264519	1.997087396	0.002044821	0.005039141
55536	CDCA7L	6.545595879	+++	2.604334589	1.213512466	3.032011546	2.283286201	2.96E-11	2.57E-10
115362	GBP5	4.583964262	+++	3.612514316	0.903271696	3.446774076	2.654186696	2.28E-06	1.00E-05
9509	ADAMTS2	2.26263508	+-+	3.024018007	-0.136168973	1.816454941	1.65888064	0.023658194	0.044711569
8073	PTP4A2	2.495028751	---	-2.032748902	-1.210903436	-0.26057075	1.168074362	0.006297346	0.013768162
6733	SRPK2	7.505977003	---	-1.361770274	-0.584434249	-1.124050227	1.02341825	3.05E-14	3.55E-13
6324	SCN1B	7.945439759	---	-2.271345755	-3.171989211	-1.912011236	2.451782067	9.99E-16	1.34E-14
93653	ST7-AS1	4.49370903	+?+	2.314328389	NA	1.624213425	1.969270907	3.50E-06	1.49E-05
207	AKT1	3.735801122	+++	1.576501318	0.935376274	0.687441739	1.066439777	9.36E-05	0.000303711
114793	FMNL2	4.614694845	---	-2.416128375	-0.634198679	-0.893486704	1.314604586	1.97E-06	8.75E-06
23097	CDK19	5.549182488	---	-2.209190571	-0.810091031	-1.144522371	1.387934657	1.44E-08	8.80E-08
1594	CYP27B1	3.719014882	+?+	4.900598415	NA	4.823661785	4.8621301	0.000100001	0.00032279
9856	KIAA0319	9.695971307	---	-3.739502773	-2.724815377	-3.732139192	3.398819114	0	0
8829	NRP1	4.569693102	+++	3.027582885	1.201830202	1.816364731	2.015259272	2.44E-06	1.07E-05
253260	RICTOR	5.489404436	---	-1.9060694	-0.998175841	-1.068389234	1.324211492	2.02E-08	1.21E-07
23683	PRKD3	7.06429128	+++	2.06269827	0.298189166	1.680435389	1.347107608	8.07E-13	8.14E-12
134957	STXBP5	10.19390808	---	-2.397563304	-2.51544853	-3.253988034	2.72233329	0	0
9920	KBTBD11	7.689103715	-?-	-2.148079848	NA	-2.173447209	2.160763529	7.44E-15	9.22E-14
10900	RUNDC3A	9.483662066	---	-3.680072822	-2.784945827	-3.375556103	3.280191584	0	0
9479	MAPK8IP1	5.384879904	---	-1.482506827	-0.457374227	-1.462358484	1.134079846	3.62E-08	2.09E-07
2557	GABRA4	8.712811494	-?-	-6.434170163	NA	-4.67680741	5.555488786	0	0
54039	PCBP3	5.848449004	-?-	-2.313431613	NA	-2.096516414	2.204974013	2.48E-09	1.71E-08
10319	LAMC3	3.113457397	+++	2.983361103	0.230520949	1.453769592	1.555883881	0.000924546	0.002449806
27440	HDHD5	3.865799024	+++	1.557185714	0.652655231	1.049947368	1.086596104	5.54E-05	0.000188226
27173	SLC39A1	7.938219783	+++	1.821474664	1.113035774	1.823571996	1.586027478	9.99E-16	1.34E-14
79709	COLGALT1	5.758535188	+++	1.701066496	1.178569873	1.622018555	1.500551641	4.24E-09	2.83E-08
66004	LYNX1	8.712194105	-?-	-3.015835957	NA	-2.892016323	2.95392614	0	0
27133	KCNH5	9.851527914	---	-5.547526672	-4.32027729	-4.684342492	4.850715485	0	0
6447	SCG5	6.022508914	---	-2.260209827	-1.274739811	-1.573700294	1.702883311	8.59E-10	6.25E-09
51046	ST8SIA3	8.711118251	-?-	-5.448741729	NA	-4.293141603	4.870941666	0	0
3838	KPNA2	6.024893393	+++	1.800720753	0.943652458	1.314268787	1.352880666	8.46E-10	6.16E-09
146223	CMTM4	7.276111911	-?-	-1.862040177	NA	-1.929941369	1.895990773	1.72E-13	1.85E-12
90523	MLIP	3.267334614	---	-3.779982327	-3.444029379	-1.191134785	2.80504883	0.000542826	0.001512301
29107	NXT1	6.747991924	+?+	2.100111995	NA	2.504908837	2.302510416	7.50E-12	6.87E-11
84446	BRSK1	9.138836706	---	-1.939830152	-1.449199419	-2.50881909	1.965949554	0	0
22874	PLEKHA6	3.453342	---	-2.685187109	-0.757585824	-1.616866843	1.686546592	0.000276843	0.000818993
58504	ARHGAP22	4.040649288	---	-3.101201722	-0.961053731	-1.19162233	1.751292594	2.67E-05	9.60E-05
8630	HSD17B6	2.834348587	---	-2.34192078	-1.533945891	-0.877674664	1.584513778	0.002295961	0.00558514
23241	PACS2	5.468268071	---	-1.512286273	-0.79471958	-1.209469244	1.172158366	2.27E-08	1.35E-07
56704	JPH1	5.668528599	---	-3.744207174	-0.988944319	-2.473209007	2.402120167	7.20E-09	4.63E-08
64400	AKTIP	3.700778457	---	-1.489070461	-1.314918703	-0.531574054	1.111854406	0.00010747	0.000344651
22995	CEP152	4.831516999	+++	1.864689065	0.831971758	1.650782601	1.449147808	6.77E-07	3.24E-06
5551	PRF1	3.594103804	+?+	4.295699267	NA	2.761823561	3.528761414	0.000162755	0.000505659
10912	GADD45G	2.434748415	+++	4.013381959	0.692546063	1.47561128	2.060513101	0.007451073	0.016019064
81790	RNF170	5.646331881	---	-1.355924447	-1.114315284	-0.684978305	1.051739345	8.20E-09	5.22E-08
26191	PTPN22	3.836340982	+-+	2.334576149	-0.010314114	2.85778963	1.734226631	0.000124881	0.000395777
7799	PRDM2	8.975301618	---	-1.633089475	-1.073088137	-1.664739472	1.456972361	0	0
3487	IGFBP4	5.021824101	+++	3.685219514	0.983153305	2.625207496	2.431193438	2.56E-07	1.30E-06
55920	RCC2	5.601661637	+++	1.443128533	0.755340414	1.276008677	1.158159208	1.06E-08	6.63E-08
6948	TCN2	4.483607149	+-+	2.206173048	-0.188631544	1.650726732	1.348510441	7.34E-06	2.95E-05
2635	GBP3	4.04907328	+++	3.39360096	0.571274006	3.156044098	2.373639688	2.57E-05	9.30E-05
11141	IL1RAPL1	7.582376843	---	-4.598918331	-3.334414465	-2.861048841	3.598127212	1.70E-14	2.03E-13
100289473	LOC100289473	7.599580443	---	-2.229323256	-1.270770398	-1.935415934	1.81183653	1.49E-14	1.79E-13
100506071	LOC100506071	3.294443077	+??	2.943469565	NA	NA	2.943469565	0.000493085	0.001385736
3925	STMN1	5.147200841	---	-1.995643315	-1.24548321	-1.321021122	1.520715882	1.32E-07	7.04E-07
1719	DHFR	5.789672384	+?+	1.613655817	NA	1.865783356	1.739719587	3.53E-09	2.38E-08
6641	SNTB1	4.663654383	+++	2.101555176	0.404059275	1.457620565	1.321078339	1.55E-06	7.03E-06
64866	CDCP1	5.06116094	+++	2.399707415	2.340493763	2.927178015	2.555793064	2.08E-07	1.07E-06
219790	RTKN2	3.472767979	+++	3.121872929	0.693815398	1.777001798	1.864230042	0.00025756	0.000767022
51222	ZNF219	2.91471091	+?+	2.051291818	NA	0.766488784	1.408890301	0.001780091	0.004438715
23001	WDFY3	7.117017813	---	-1.439985491	-0.576453652	-1.159172376	1.058537173	5.51E-13	5.64E-12
9839	ZEB2	4.865185624	---	-2.158738202	-0.966225909	-0.975920969	1.366961693	5.72E-07	2.76E-06
2051	EPHB6	9.662447665	---	-5.2523766	-3.685747485	-3.873974084	4.27069939	0	0
9050	PSTPIP2	3.529239488	+++	2.112457459	0.312353847	1.800850923	1.408554076	0.000208378	0.000632699
541471	MIR4435-2HG	4.973878878	+++	3.685482246	1.340235671	2.127504603	2.384407507	3.28E-07	1.64E-06
10767	HBS1L	7.007981684	---	-1.705862015	-1.40023973	-1.007877502	1.371326416	1.21E-12	1.20E-11
23162	MAPK8IP3	8.758696632	---	-1.501723753	-0.691587595	-2.698679614	1.630663654	0	0
9294	S1PR2	4.199681864	+?+	2.13442742	NA	1.793101814	1.963764617	1.34E-05	5.11E-05
220416	LRRC63	3.59469115	-?-	-3.685593707	NA	-1.50519167	2.595392689	0.000162388	0.000504605
375775	PNPLA7	5.38155302	---	-1.976205043	-0.195062133	-1.859123807	1.343463661	3.69E-08	2.12E-07
84976	DISP1	6.367323344	+-+	1.527875644	-0.347592148	1.621799404	1.165755732	1.92E-10	1.51E-09
286178	LOC286178	2.612871214	+?+	4.170983648	NA	3.29322149	3.732102569	0.004489256	0.010165768
90293	KLHL13	3.872371895	+?+	1.746575603	NA	1.378795709	1.562685656	5.39E-05	0.000183663
[truncated: 4,139 more rows]
